# Supplementary material
Source: publisher figshare collection journal article supplement (https://acs.figshare.com/ndownloader/files/8403194)
Supplement: Supplementary file 1 [file 8403194]

# SUPPORTING INFORMATION

## Nickel-Catalyzed Reductive Dicarbonylation of Alkenes

Andrés García-Domínguez, Zhaodong Li and Cristina Nevado

### CONTENT

|                                                     |     |
|-----------------------------------------------------|-----|
| 1. General Information                              | S2  |
| 2. Optimization of Reaction Conditions              | S3  |
| 3. Synthesis and Characterization of New Substrates | S4  |
| 4. Synthesis and Characterization of New Products   | S7  |
| 5. Control Experiments                              | S23 |
| 6. Additional Results                               | S33 |
| 7. Alternative Mechanistic Proposal                 | S33 |
| 8. NMR Spectra of New Substrates                    | S34 |
| 9. NMR Spectra of New Products                      | S39 |
| 10. X Ray Diffraction Data                          | S80 |
| 11. References                                      | S84 |

## 1. General Information

NMR spectra were recorded on AV2 400 Bruker spectrometers. Chemical shifts are given in ppm and the spectra are calibrated using the residual chloroform signals: 7.26 ppm for  $^1\text{H}$  NMR and 77.16 ppm for  $^{13}\text{C}$  NMR. Multiplicities are abbreviated as follows: singlet (s), doublet (d), triplet (t), quartet (q), doublet-doublet (dd), multiplet (m) and broad (br). Infrared spectra were recorded on a JASCO FT/IR-4100 spectrometer. High-resolution mass spectrometry was performed on a Finnigan MAT 900 (ThermoFinnigan, San Jose, CA; USA) double focusing magnetic sector mass spectrometer. A mass accuracy  $\leq 2$  ppm was obtained in the peak matching acquisition mode by using a solution containing 2<1 PEG200, 2<1 PPG450, and 1.5 mg NaOAc (all obtained from Sigma-Aldrich, CH-Buchs) dissolved in 100 mL MeOH (HPLC Supra grade, Scharlau, E-Barcelona) as internal standard.

**Materials and Methods:** Unless otherwise stated, all the reactions were performed using Schlenk techniques under  $\text{N}_2$  atmosphere outside the glovebox. The following compounds were prepared according to the procedures described previously in the literature:  $\text{NiCl}_2(\text{Py})_4$ ,<sup>1</sup> 2-iodo-2-methylbutane,<sup>2</sup> 6-iodo-6-methyl-1-heptene,<sup>3</sup> 1-chloro-4-iodo-4-methylpenten,<sup>4</sup> 1-iodo-1-methylcyclohexene,<sup>5</sup> 2-iodo-2-methyl-1-phenylbutane,<sup>6</sup> 4,4,5,5,6,6,7,7,7-nonafluoro-2-iodoheptyl acetate<sup>7</sup> and  $(\text{dtbbpy})\text{NiI}_2$ .<sup>8</sup>

The remaining chemicals presented in this work were purchased from Aldrich, Fluka, TCI Europe, Fluorochem and/or ABCR and used as received except TDAE, which was transferred into a Schlenck under  $\text{N}_2$  and stored at 4 °C. THF was dried using a solvent purification system (Pure Solv PS-MD-4EN, Innovative Technology Inc.) equipped with alumina drying columns under Ar. Thin Layer Chromatography was performed using Merck TLC silica gel 60 F<sub>254</sub> plates and visualized using UV light at 254 nm and/or stained with an ethanolic solution of phosphomolybdic acid. Flash column chromatography was performed over silica gel (230-400 mesh).

## 2. Optimization of Reaction Conditions<sup>a</sup>

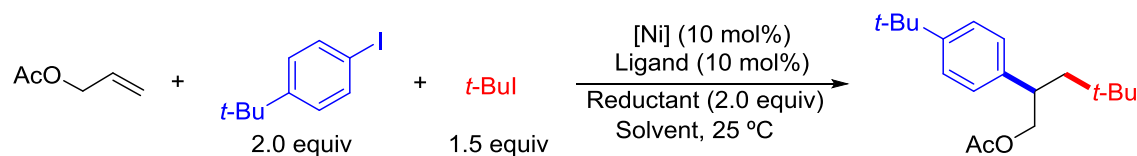

| Entry | [Ni]                                | Ligand    | Reductant                                           | Solvent                   | Yield of <b>1</b> (%) <sup>b</sup> |
|-------|-------------------------------------|-----------|-----------------------------------------------------|---------------------------|------------------------------------|
| 1     | NiCl <sub>2</sub> ·DME              | <b>L1</b> | Zn                                                  | THF (0.4M)                | 0                                  |
| 2     | NiCl <sub>2</sub> ·DME              | <b>L1</b> | Mn                                                  | THF (0.4M)                | 0                                  |
| 3     | NiCl <sub>2</sub> ·DME              | <b>L1</b> | B <sub>2</sub> pin <sub>2</sub> /KO <sup>t</sup> Bu | THF (0.4M)                | 0                                  |
| 4     | NiCl <sub>2</sub> ·DME              | <b>L1</b> | TDAE <sup>c</sup>                                   | THF (0.4M)                | 17                                 |
| 5     | NiCl <sub>2</sub> ·DME              | <b>L1</b> | TDAE <sup>c</sup>                                   | DCM (0.4M)                | 8                                  |
| 6     | NiCl <sub>2</sub> ·DME              | <b>L1</b> | TDAE <sup>c</sup>                                   | CH <sub>3</sub> CN (0.4M) | 0                                  |
| 7     | NiCl <sub>2</sub> ·DME              | <b>L1</b> | TDAE <sup>c</sup>                                   | DMF (0.4M)                | 12                                 |
| 8     | NiCl <sub>2</sub> ·DME              | <b>L1</b> | TDAE <sup>c</sup>                                   | THF (0.05M)               | 17                                 |
| 9     | NiCl <sub>2</sub> ·DME              | <b>L1</b> | TDAE <sup>c</sup>                                   | THF (0.1M)                | 2                                  |
| 10    | NiCl <sub>2</sub> ·DME              | <b>L1</b> | TDAE <sup>c</sup>                                   | THF (0.7M)                | 4                                  |
| 11    | NiCl <sub>2</sub> ·DME              | <b>L2</b> | TDAE <sup>c</sup>                                   | THF (0.4M)                | 1                                  |
| 12    | NiCl <sub>2</sub> ·DME              | <b>L3</b> | TDAE <sup>c</sup>                                   | THF (0.4M)                | 2                                  |
| 13    | NiCl <sub>2</sub> ·DME              | <b>L4</b> | TDAE <sup>c</sup>                                   | THF (0.4M)                | 0                                  |
| 14    | NiBr <sub>2</sub> ·DME              | <b>L1</b> | TDAE <sup>c</sup>                                   | THF (0.4M)                | 54                                 |
| 15    | Ni(acac) <sub>2</sub>               | <b>L1</b> | TDAE <sup>c</sup>                                   | THF (0.4M)                | 27                                 |
| 16    | NiCl <sub>2</sub> (Py) <sub>4</sub> | <b>L1</b> | TDAE <sup>c</sup>                                   | THF (0.4M)                | 82 (83)                            |
| 17    | NiCl <sub>2</sub> (Py) <sub>4</sub> | <b>L1</b> | TDAE <sup>d</sup>                                   | THF (0.4M)                | 33                                 |
| 18    | -                                   | <b>L1</b> | TDAE <sup>c</sup>                                   | THF (0.4M)                | 0                                  |
| 19    | NiCl <sub>2</sub> (Py) <sub>4</sub> | -         | TDAE <sup>c</sup>                                   | THF (0.4M)                | 0                                  |

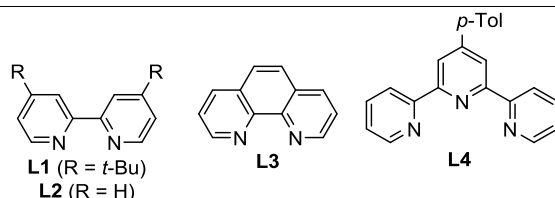

<sup>a</sup> Conditions: Allyl acetate (20.0 mg, 0.2 mmol, 1.0 equiv), 4-*tert*-butyliodobenzene (104.4 mg, 0.4 mmol, 2.0 equiv), *tert*-butyl iodide (55.2 mg, 0.3 mmol, 1.5 equiv), nickel catalyst (0.02 mmol, 10 mol%), ligand (0.02 mmol, 10 mol%), reductant (0.4 mmol, 2.0 equiv), solvent, 25 °C, 15 h. <sup>b</sup> Yield determined by <sup>1</sup>H NMR with *p*-nitroacetophenone as internal standard. In brackets: Isolated yield after column chromatography. <sup>c</sup> TDAE (0.1 mL, 0.43 mmol, 2.15 equiv) was used.

<sup>d</sup> TDAE (47 μL, 0.2 mmol, 1.0 equiv) was used.

### 3. Synthesis and Characterization of New Substrates

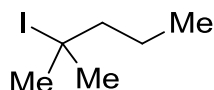

**2-iodo-2-methylpentane (S1).** The title compound was prepared following a reported procedure.<sup>3,5</sup> Diphosphorous tetraiodide (769 mg, 1.35 mmol) was placed in a two necked 50 mL round bottomed flask. The flask was evacuated and back filled with N<sub>2</sub> three times and CS<sub>2</sub> (15 mL) added. The orange suspension was cooled at 0 °C (ice bath), 2-methylpentan-2-ol (0.61 mL, 511 mg, 5.00 mmol) was added and the brown red mixture stirred until complete consumption of the starting alcohol (TLC monitoring). The ice bath was removed and solid potassium carbonate, followed by a saturated aqueous solution of potassium carbonate (25 mL) were added. The orange water layer was extracted with Et<sub>2</sub>O (6 x 25 mL) and the combined organic layers dried over MgSO<sub>4</sub>. After filtration, the solvent was removed carefully under reduced pressure to obtain 2-iodo-2-methylpentane (738 mg, 3.48 mmol, 70% yield) as a yellow oil which was used without further purification. <sup>1</sup>H NMR (300 MHz, CDCl<sub>3</sub>) δ 1.92 (s, 6H), 1.65 – 1.46 (m, 4H), 0.97 (t, *J* = 7.0 Hz, 3H); <sup>13</sup>C NMR (75 MHz, CDCl<sub>3</sub>) δ 52.96, 38.22 (2 x C), 21.98, 13.98; IR (film): ν (cm<sup>-1</sup>) 2958, 2932, 2872, 2826, 1463, 1455, 1384, 1367, 1306, 1291, 1249, 1221, 1179, 1133, 1111, 1090, 1075, 1059, 1039, 1007, 998, 961, 900, 860, 811; HR-MS (EI) *m/z* calcd for C<sub>6</sub>H<sub>13</sub> [M – I]: 85.10118, found 85.10190.

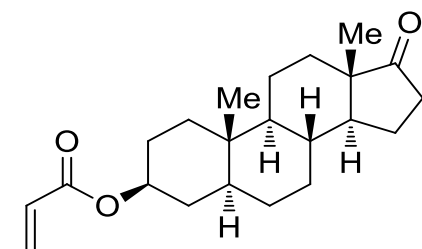

**(3S,5S,8R,9S,10S,13S,14S)-10,13-Dimethyl-17-oxohexadecahydro-1H-**

**cyclopenta[a]phenanthren-3-yl acrylate (S2).** To a solution of epiandrosterone (1.45 g, 5.0 mmol) and Et<sub>3</sub>N (1.5 mL, 10.0 mmol) in CH<sub>2</sub>Cl<sub>2</sub> (50.0 mL) at 0 °C was added acryloyl chloride (0.54 g, 6.0 mmol). The reaction mixture was warmed to 25 °C and stirred for 12 h. The mixture was quenched with H<sub>2</sub>O (10.0 mL), extracted with CH<sub>2</sub>Cl<sub>2</sub> (3 x 20.0 mL) and the combined organic layer was dried over MgSO<sub>4</sub>, filtered and concentrated under reduced pressure. The resulting residue was purified by chromatography on silica gel using Hexane/EtOAc 20/1 (v/v) as eluent to afford the product as a colourless solid (1.63 g, 4.75 mmol, 95% yield). <sup>1</sup>H NMR (400 MHz,

CDCl<sub>3</sub>)  $\delta$  6.36 (dd,  $J$  = 17.3, 1.5 Hz, 1H), 6.07 (dd,  $J$  = 17.3, 10.4 Hz, 1H), 5.77 (dd,  $J$  = 10.4, 1.6 Hz, 1H), 4.87 – 4.67 (m, 1H), 2.42 (dd,  $J$  = 19.1, 8.8 Hz, 1H), 2.05 (dt,  $J$  = 19.1, 9.0 Hz, 1H), 1.96 – 1.70 (m, 5H), 1.70 – 1.60 (m, 2H), 1.60 – 1.16 (m, 10H), 1.11 – 0.90 (m, 2H), 0.85 (s, 3H), 0.84 (s, 3H), 0.77 – 0.66 (m, 1H); <sup>13</sup>C NMR (101 MHz, CDCl<sub>3</sub>)  $\delta$  221.21, 165.86, 130.29, 129.19, 73.76, 54.45, 51.50, 47.88, 44.79, 36.83, 35.94, 35.78, 35.17, 34.05, 31.66, 30.93, 28.39, 27.52, 21.89, 20.59, 13.93, 12.34; IR (film):  $\nu$  (cm<sup>-1</sup>) 2951, 2917, 1735, 1713, 1616, 1471, 1453, 1440, 1407, 1269, 1197, 1150, 1130, 1110, 1079, 1049, 1014, 997, 982, 971, 937, 920, 902, 893, 884, 863, 844, 831, 812; HR-MS (ESI)  $m/z$  calcd for C<sub>22</sub>H<sub>32</sub>O<sub>3</sub>Na [M + Na<sup>+</sup>]: 367.22437, found 367.22429.

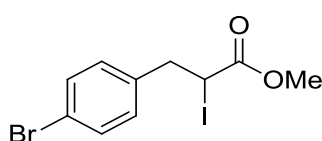

### Methyl 3-(4-bromophenyl)-2-iodopropanoate (S3).

**Step 1:** Red phosphorus (150 mg, 4.84 mmol) was added at 25 °C to 3-phenylpropanoyl chloride (3.36 g, 20 mmol) while stirring. Then, Br<sub>2</sub> (2.05 mL, 40 mmol) was added dropwise maintaining the temperature below 100 °C. When the addition was finished, the reaction mixture was heated at 100 °C for 12 h and cooled to 25 °C. Then, the mixture was cooled to 0 °C (ice bath) and dry methanol (40.0 mL) was added dropwise. The reaction mixture was warmed to 25 °C and then heated at reflux for 6 h. After cooling the reaction mixture to 25 °C, cold water was added and the aqueous layer was extracted with CH<sub>2</sub>Cl<sub>2</sub> (3 x 30 mL). The combined organic layer was dried over MgSO<sub>4</sub>, filtered and the solvent removed under reduced pressure. The crude product was purified by chromatography on silica gel using Hexane/EtOAc 20/1 (v/v) as eluent to afford methyl 2-bromo-3-(4-bromophenyl)propanoate as a brown oil (3.83 g, 60% yield).

**Step 2:** To a solution of methyl 2-bromo-3-(4-bromophenyl)propanoate (3.19 g, 10.0 mmol) in acetone (30.0 mL) was added NaI (2.98 g, 20.0 mmol) at 25 °C. The reaction mixture was heated at reflux for 12 h and after cooling to 25 °C, quenched with H<sub>2</sub>O (10.0 mL) and extracted with CH<sub>2</sub>Cl<sub>2</sub> (3 x 20 mL). The combined organic layer was dried over MgSO<sub>4</sub>, filtered and concentrated under reduced pressure. The resulting residue was purified by chromatography on silica gel using Hexane/EtOAc 20/1 (v/v) as eluent to afford methyl 3-(4-bromophenyl)-2-iodopropanoate as a brown oil (3.50 g, 95% yield). <sup>1</sup>H NMR (300 MHz, CDCl<sub>3</sub>)  $\delta$  7.42 (d,  $J$  = 8.4 Hz, 2H), 7.07 (d,  $J$  = 8.4 Hz, 2H), 4.46 (dd,  $J$  = 9.0, 6.8 Hz, 1H), 3.70 (s, 3H), 3.41 (dd,  $J$  = 14.3, 9.1 Hz, 1H), 3.20 (dd,  $J$  = 14.3, 6.8 Hz, 1H); <sup>13</sup>C NMR (75 MHz, CDCl<sub>3</sub>)  $\delta$  171.40, 137.52, 131.97,

130.74, 121.40, 53.08, 41.86, 19.20; IR (film):  $\nu$  (cm<sup>-1</sup>) 3027, 2950, 1732, 1487, 1434, 1404, 1355, 1308, 1291, 1275, 1223, 1158, 1116, 1071, 1057, 1045, 1011, 979, 910, 839;

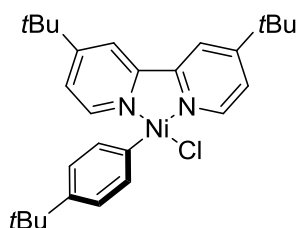

**[(dtbbpy)Ni(4-*t*-Bu-C<sub>6</sub>H<sub>4</sub>)Cl] (43):** In a nitrogen filled glove box, a 50 mL round bottom flask containing a PTFE-coated stir bar was charged with [Ni(cod)<sub>2</sub>] (550 mg, 2.0 mmol, 1.0 equiv), 4,4'-di-*tert*-butyl-2,2'-pyridine (537 mg, 2.0 mmol, 1.0 equiv) and dry THF (8.0 mL) giving a deep purple mixture which was stirred for 2 hours at 25 °C. 4-*tert*-butylchlorobenzene (5.0 g, 29.6 mmol, 14.8 equiv) was added and stirred for additional 30 minutes. Dry pentane (30 mL) was added to the deep red coloured mixture and filtered. The resulting precipitate was washed with pentane (3 x 10 mL) and dried under vacuum to give the desired complex **43** as an orange powder (803 mg, 1.62 mmol, 81% yield). The product was used as such without further purification. The complex was stored in a nitrogen filled glove box at -35 °C and showed to be stable in solid form. In solution (CH<sub>2</sub>Cl<sub>2</sub>) significant decomposition was observed after 8h. <sup>1</sup>H NMR (300 MHz, CD<sub>2</sub>Cl<sub>2</sub>)  $\delta$  9.02 (s, 1H), 7.84 (d, *J* = 13.4 Hz, 2H), 7.53 (s, 1H), 7.45 – 7.26 (m, 3H), 7.15 (s, 1H), 7.03 (d, *J* = 7.1 Hz, 2H), 1.42 (s, 9H), 1.35 (s, 9H), 1.31 (s, 9H); <sup>13</sup>C NMR (101 MHz, CD<sub>2</sub>Cl<sub>2</sub>) 163.34, 162.35, 155.62, 152.45, 151.71, 148.86, 144.72, 144.60, 135.41, 123.15, 123.01, 122.83, 117.27, 116.58, 35.09, 33.43, 31.20, 30.78, 29.90, 29.67; IR (film):  $\nu$  (cm<sup>-1</sup>) 3056, 3035, 2962, 2905, 2867, 1614, 1550, 1480, 1464, 1408, 1365, 1267, 1251, 1200, 1178, 1110, 1078, 1053, 1020, 1008, 936, 921, 897, 849, 822, 809, 792, 763, 749, 735, 721, 699, 687, 677, 654, 645, 632, 606.

## 4. Synthesis and Characterization of New Products

### 4.1 General Procedure for the Reductive Alkene Dicarbonylation

$\text{NiCl}_2(\text{Py})_4$  (8.9 mg, 0.02 mmol, 10 mol%), **L1** (5.4 mg, 0.02 mmol, 10 mol%) and aryl iodide if solid (0.4 mmol, 2.0 equiv) were placed in an oven dried Schlenk flask. The reaction vessel was evacuated and filled back with nitrogen three times. THF (0.5 mL), unsaturated substrate (0.2 mmol, 1.0 equiv), aryl iodide if liquid (0.4 mmol, 2.0 equiv) and alkyl iodide (0.3 mmol, 1.5 equiv) were sequentially added and stirred (1400 rpm) one minute at 25 °C. TDAE (0.1 mL, 0.43 mmol, 2.15 equiv) was added dropwise and the reaction stirred for additional 15 h at 25 °C under  $\text{N}_2$ . The mixture was diluted with  $\text{Et}_2\text{O}$  (5 mL) and transferred into a separatory funnel containing aqueous HCl 1M (5 mL). The phases were separated and the aqueous phase extracted with  $\text{Et}_2\text{O}$  twice. The combined organic layers were dried over anhydrous  $\text{MgSO}_4$  and after filtration and removal of the solvent under reduced pressure, the resulting residue was purified by column chromatography on silica gel to obtain the corresponding products in pure form.

### 4.2 Characterization of New Products

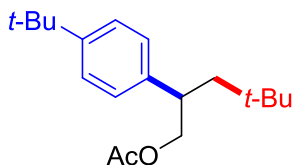

**2-(4-(*tert*-Butyl)phenyl)-4,4-dimethylpentyl acetate (1).** Colorless oil.  $^1\text{H}$  NMR (400 MHz,  $\text{CDCl}_3$ )  $\delta$  7.29 (d,  $J$  = 8.4 Hz, 2H), 7.12 (d,  $J$  = 8.3 Hz, 2H), 4.09 (dd,  $J$  = 9.3, 5.8 Hz, 1H), 4.05 (dd,  $J$  = 9.3, 5.8 Hz, 1H), 3.01 – 2.94 (m, 1H), 1.98 (s, 3H), 1.69 (dd,  $J$  = 14.0, 8.0 Hz, 1H), 1.58 (dd,  $J$  = 14.0, 3.7 Hz, 1H), 1.30 (s, 9H), 0.82 (s, 9H);  $^{13}\text{C}$  NMR (101 MHz,  $\text{CDCl}_3$ )  $\delta$  171.22, 149.34, 140.85, 127.76, 125.35, 69.91, 46.06, 41.20, 34.51, 31.55, 31.27, 30.11, 21.12. IR (film):  $\nu$  ( $\text{cm}^{-1}$ ) 3092, 3051, 3026, 2954, 2904, 2867, 1741, 1511, 1466, 1413, 1393, 1382, 1364, 1229, 1121, 1079, 1032, 976, 919, 887, 829; HR-MS (ESI)  $m/z$  calcd for  $\text{C}_{19}\text{H}_{30}\text{O}_2\text{Na}$  [ $\text{M} + \text{Na}^+$ ]: 313.21380, found 313.21364.

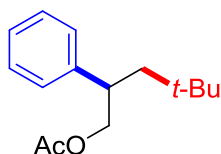

**4,4-Dimethyl-2-phenylpentyl acetate (2).** Colorless oil.  $^1\text{H}$  NMR (400 MHz,  $\text{CDCl}_3$ )  $\delta$  7.32 – 7.25 (m, 2H), 7.25 – 7.17 (m, 3H), 4.12 (dd,  $J$  = 9.4, 5.7 Hz, 1H), 4.08 (dd,  $J$  = 9.4, 6.1 Hz, 1H), 3.08 – 2.98 (m, 1H), 1.97 (s, 3H), 1.71 (dd,  $J$  = 14.0, 8.4 Hz, 1H), 1.59 (dd,  $J$  = 14.1, 3.5 Hz, 1H), 0.82 (s, 9H);  $^{13}\text{C}$  NMR (101 MHz,  $\text{CDCl}_3$ )  $\delta$  171.12, 144.00, 128.53, 128.23, 126.59, 69.83, 46.00, 41.81, 31.28, 30.11, 21.04; IR (film):  $\nu$  ( $\text{cm}^{-1}$ ) 3086, 3063, 3028, 2953, 2867, 1739, 1610, 1495, 1467, 1454, 1383, 1365, 1228, 1031, 912; HR-MS (ESI)  $m/z$  calcd for  $\text{C}_{15}\text{H}_{22}\text{O}_2\text{Na}$  [ $\text{M} + \text{Na}^+$ ]: 257.15120, found 257.15107.

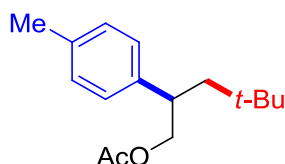

**4,4-Dimethyl-2-(4-tolyl)pentyl acetate (3).** Colorless oil.  $^1\text{H}$  NMR (400 MHz,  $\text{CDCl}_3$ )  $\delta$  7.10 (br s, 4H), 4.09 (dd,  $J$  = 10.7, 7.0 Hz, 1H), 4.04 (dd,  $J$  = 10.7, 7.4 Hz, 1H), 3.04 – 2.92 (m, 1H), 2.32 (s, 3H), 1.97 (s, 3H), 1.68 (dd,  $J$  = 14.0, 8.3 Hz, 1H), 1.57 (dd,  $J$  = 14.0, 3.5 Hz, 1H), 0.82 (s, 9H);  $^{13}\text{C}$  NMR (101 MHz,  $\text{CDCl}_3$ )  $\delta$  171.17, 140.94, 136.04, 129.23, 128.06, 69.96, 46.02, 41.35, 31.28, 30.12, 21.17, 21.08; IR (film):  $\nu$  ( $\text{cm}^{-1}$ ) 3020, 2953, 2865, 1741, 1653, 1514, 1467, 1382, 1364, 1230, 1165, 1114, 1095, 1076, 1032, 1006, 983, 920, 886, 860, 844, 834; HR-MS (ESI)  $m/z$  calcd for  $\text{C}_{16}\text{H}_{24}\text{O}_2\text{Na}$  [ $\text{M} + \text{Na}^+$ ]: 271.16685, found 271.16680.

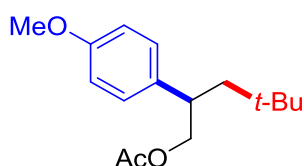

**4,4-Dimethyl-2-(4-methoxyphenyl)pentyl acetate (4).** Colorless oil.  $^1\text{H}$  NMR (400 MHz,  $\text{CDCl}_3$ )  $\delta$  7.12 (d,  $J$  = 8.7 Hz, 2H), 6.83 (d,  $J$  = 8.7 Hz, 2H), 4.07 (dd,  $J$  = 8.9, 5.4 Hz, 1H), 4.03 (dd,  $J$  = 8.9, 5.6 Hz, 1H), 3.78 (s, 3H), 3.06 – 2.88 (m, 1H), 1.97 (s, 3H), 1.66 (dd,  $J$  = 14.0, 8.5 Hz, 1H), 1.56 (dd,  $J$  = 14.0, 3.5 Hz, 1H), 0.81 (s, 9H);  $^{13}\text{C}$  NMR (101 MHz,  $\text{CDCl}_3$ )  $\delta$  171.11, 158.30, 135.93, 129.06, 113.91, 69.96, 55.29, 46.03, 40.92, 31.21, 30.12, 21.04; IR (film):  $\nu$  ( $\text{cm}^{-1}$ ) 3032, 2999, 2951, 2865, 2836, 1737, 1612, 1584, 1511, 1465, 1444, 1382, 1364, 1301, 1239, 1228, 1178, 1111, 1031, 975, 887 828; HR-MS (ESI)  $m/z$  calcd  $\text{C}_{16}\text{H}_{24}\text{O}_3\text{Na}$  [ $\text{M} + \text{Na}^+$ ]: 287.16177, found 287.16159.



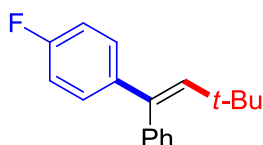

**(E)-1-(3,3-Dimethyl-1-phenylbut-1-en-1-yl)-4-fluorobenzene (5).** Colorless oil. NMR (400 MHz,  $\text{CDCl}_3$ )  $\delta$  7.38 – 7.28 (m, 3H), 7.21 – 7.12 (m, 4H), 6.92 (t,  $J$  = 8.8 Hz, 2H), 6.03 (s, 1H), 0.97 (s, 9H);  $^{13}\text{C}$  NMR (101 MHz,  $\text{CDCl}_3$ )  $\delta$  161.98 (d,  $J$  = 245.7 Hz), 140.76, 140.38 (d,  $J$  = 3.2 Hz), 140.08 (d,  $J$  = 1.4 Hz), 138.28, 130.38, 128.52 (d,  $J$  = 7.9 Hz), 127.99, 127.02, 114.85 (d,  $J$  = 21.3 Hz), 34.11, 31.44;  $^{19}\text{F}$  NMR (376 MHz,  $\text{CDCl}_3$ )  $\delta$  -116.71 (tt,  $J$  = 8.5, 5.5 Hz, 1F); IR (film):  $\nu$  ( $\text{cm}^{-1}$ ) 3077, 3055, 3020, 2957, 2901, 2865, 1600, 1576, 1505, 1474, 1460, 1441, 1409, 1393, 1361, 1299, 1281, 1265, 1230, 1189, 1158, 1099, 1072, 1028, 1013, 958, 922, 889, 831, 811; HR-MS (EI)  $m/z$  calcd for  $\text{C}_{18}\text{H}_{19}\text{F}$  [ $\text{M}^+$ ]: 254.14653, found 254.14683.

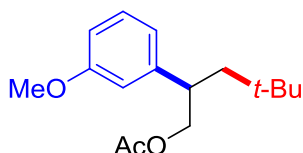

**2-(3-Methoxyphenyl)-4,4-dimethylpentyl acetate (6).** Colorless oil.  $^1\text{H}$  NMR (400 MHz,  $\text{CDCl}_3$ )  $\delta$  7.20 (td,  $J$  = 7.7, 0.7 Hz, 1H), 6.81 (dd,  $J$  = 7.6, 1.1 Hz, 1H), 6.78 – 6.73 (m, 2H), 4.12 (m, 2 H), 3.80 (s, 3H), 3.03 – 2.94 (m, 1H), 1.98 (s, 3H), 1.69 (dd,  $J$  = 14.1, 8.3 Hz, 1H), 1.57 (dd,  $J$  = 14.1, 3.5 Hz, 1H), 0.82 (s, 9H);  $^{13}\text{C}$  NMR (101 MHz,  $\text{CDCl}_3$ )  $\delta$  171.15, 159.77, 145.74, 129.48, 120.70, 114.27, 111.58, 69.78, 55.31, 45.99, 41.84, 31.29, 30.09, 21.08; IR (film):  $\nu$  ( $\text{cm}^{-1}$ ) 3047, 2952, 2865, 2835, 1738, 1600, 1585, 1487, 1466, 1455, 1437, 1382, 1364, 1315, 1262, 1229, 1152, 1093, 1035, 995, 976, 946, 923, 865, 855, 835; HR-MS (ESI)  $m/z$  calcd for  $\text{C}_{16}\text{H}_{24}\text{O}_3\text{Na}$  [ $\text{M} + \text{Na}^+$ ]: 287.16177, found 287.16181.

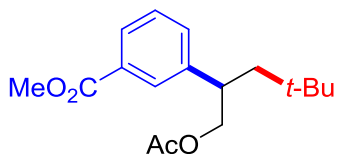

**3-(1-acetoxy-4,4-dimethylpentan-2-yl)phenyl acetate (7).** White solid.  $^1\text{H}$  NMR (400 MHz,  $\text{CDCl}_3$ )  $\delta$  7.81 (t,  $J$  = 1.6 Hz, 1H), 7.78 (dt,  $J$  = 7.5, 1.5 Hz, 1H), 7.31 (dt,  $J$  = 7.7, 1.5 Hz, 1H), 7.25 (t,  $J$  = 7.6 Hz, 1H), 4.03 (dd,  $J$  = 10.8, 6.7 Hz, 1H), 3.96 (dd,  $J$  = 10.8, 7.8 Hz, 1H), 3.81 (s, 3H), 3.03 – 2.93 (m, 1H), 1.84 (s, 3H), 1.62 (dd,  $J$  = 14.1, 8.4 Hz, 1H), 1.50 (dd,  $J$  = 14.1, 3.5 Hz, 1H), 0.70 (s, 9H);  $^{13}\text{C}$  NMR (101 MHz,  $\text{CDCl}_3$ )  $\delta$  170.98, 167.21, 144.48, 132.88, 130.45, 129.32, 128.59, 127.94, 69.53, 52.19, 45.92, 41.65, 31.29, 30.08, 20.94; IR (film):  $\nu$  ( $\text{cm}^{-1}$ ) 3056, 2952, 2907, 2867, 1721, 1606, 1588,

1467, 1445, 1433, 1382, 1365, 1281, 1226, 1204, 1109, 1089, 1034, 980, 908, 847, 818; HR-MS (ESI)  $m/z$  calcd for  $C_{17}H_{24}O_4Na$   $[M + Na^+]$ : 315.15668, found 315.15665.

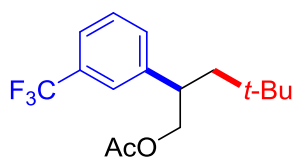

**4,4-Dimethyl-2-(3-(trifluoromethyl)phenyl)pentyl acetate (8).** Colorless oil.  $^1H$  NMR (400 MHz,  $CDCl_3$ )  $\delta$  7.51 – 7.45 (m, 2H), 7.44 – 7.39 (m, 2H), 4.13 (dd,  $J$  = 10.8, 6.5 Hz, 1H), 4.07 (dd,  $J$  = 10.8, 7.8 Hz, 1H), 3.16 – 3.04 (m, 1H), 1.95 (s, 3H), 1.72 (dd,  $J$  = 14.2, 8.2 Hz, 1H), 1.62 (dd,  $J$  = 14.2, 3.7 Hz, 1H), 0.82 (s, 9H);  $^{13}C$  NMR (101 MHz,  $CDCl_3$ )  $\delta$  170.97, 145.09, 131.58, 130.89 (q,  $J$  = 32.0 Hz), 129.01, 125.04 (q,  $J$  = 3.7 Hz), 124.34 (q,  $J$  = 272.2 Hz), 123.56 (q,  $J$  = 3.8 Hz), 69.42, 45.87, 41.72, 31.32, 30.07, 20.90;  $^{19}F$  NMR (376 MHz,  $CDCl_3$ )  $\delta$  -62.59 (s, 3F); IR (film):  $\nu$  ( $cm^{-1}$ ) 3067, 3026, 2956, 2869, 1740, 1469, 1450, 1366, 1324, 1226, 1161, 1122, 1073, 1034, 897, 829, 802; HR-MS (ESI)  $m/z$  calcd for  $C_{16}H_{21}O_2F_3Na$   $[M + Na^+]$ : 325.13859, found 325.13871.

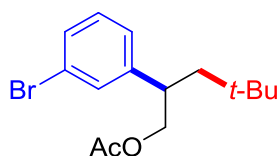

**2-(3-Bromophenyl)-4,4-dimethylpentyl acetate (9).** Colorless oil.  $^1H$  NMR (400 MHz,  $CDCl_3$ )  $\delta$  7.40 – 7.32 (m, 2H), 7.19 – 7.12 (m, 2H), 4.10 (dd,  $J$  = 10.8, 6.7 Hz, 1H), 4.04 (dd,  $J$  = 10.8, 7.7 Hz, 1H), 3.04 – 2.94 (m, 1H), 1.97 (s, 3H), 1.67 (dd,  $J$  = 14.1, 8.2 Hz, 1H), 1.57 (dd,  $J$  = 14.1, 3.6 Hz, 1H), 0.82 (s, 9H);  $^{13}C$  NMR (101 MHz,  $CDCl_3$ )  $\delta$  171.04, 146.54, 131.29, 130.14, 129.79, 126.91, 122.62, 69.49, 45.93, 41.60, 31.32, 30.09, 21.00; IR (film):  $\nu$  ( $cm^{-1}$ ) 3060, 2953, 2866, 1738, 1592, 1566, 1474, 1429, 1382, 1364, 1226, 1168, 1072, 1034, 997, 979, 913, 880, 838; HR-MS (ESI)  $m/z$  calcd for  $C_{15}H_{21}BrO_2Na$   $[M + Na^+]$ : 335.06171, found 335.06185.

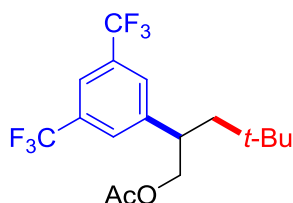

**2-(3,5-bis(trifluoromethyl)phenyl)-4,4-dimethylpentyl acetate (10).** Colorless oil.  $^1H$  NMR (400 MHz,  $CDCl_3$ )  $\delta$  7.75 (br s, 1H), 7.67 (br s, 2H), 4.18 (dd,  $J$  = 10.9, 5.9 Hz, 1H), 4.06 (dd,  $J$  = 10.9, 8.0 Hz, 1H), 3.26 – 3.13 (m, 1H), 1.95 (s, 3H), 1.73 (dd,  $J$  = 14.3, 7.8 Hz, 1H), 1.66 (dd,  $J$  = 14.3, 4.0 Hz, 1H), 0.84 (s, 9H);  $^{13}C$  NMR (101 MHz,

CDCl<sub>3</sub>)  $\delta$  170.80, 146.83, 131.85 (q,  $J$  = 33.2 Hz), 128.44 (q,  $J$  = 2.7 Hz), 123.51 (q,  $J$  = 272.6 Hz), 121.01 – 119.93 (m), 69.02, 45.80, 41.68, 31.38, 30.04, 20.79; <sup>19</sup>F NMR (376 MHz, CDCl<sub>3</sub>)  $\delta$  -62.87 (s, 6F); IR (film):  $\nu$  (cm<sup>-1</sup>) 3056, 2959, 2910, 2870, 1741, 1622, 1469, 1377, 1368, 1353, 1276, 1266, 1228, 1170, 1131, 1081, 1062, 1037, 982, 950, 935, 924, 895, 843; HR-MS (ESI)  $m/z$  calcd for C<sub>17</sub>H<sub>20</sub>F<sub>6</sub>O<sub>2</sub>Na [M + Na<sup>+</sup>]: 393.12597, found 393.12595.

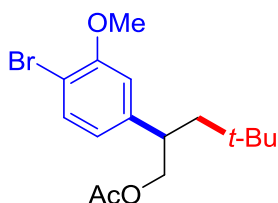

**2-(4-Bromo-3-methoxyphenyl)-4,4-dimethylpentan-2-yl acetate (11).** White solid. <sup>1</sup>H NMR (400 MHz, CDCl<sub>3</sub>)  $\delta$  7.43 (d,  $J$  = 8.0 Hz, 1H), 6.74 (d,  $J$  = 1.9 Hz, 1H), 6.71 (dd,  $J$  = 8.1, 2.0 Hz, 1H), 4.09 (dd,  $J$  = 9.7, 5.9 Hz, 1H), 4.05 (dd,  $J$  = 9.7, 6.6 Hz, 1H), 3.89 (s, 3H), 3.08 – 2.92 (m, 1H), 1.97 (s, 3H), 1.66 (dd,  $J$  = 14.1, 8.2 Hz, 1H), 1.57 (dd,  $J$  = 14.1, 3.6 Hz, 1H), 0.82 (s, 9H); <sup>13</sup>C NMR (101 MHz, CDCl<sub>3</sub>)  $\delta$  171.03, 155.95, 145.11, 133.25, 121.65, 112.03, 109.63, 69.48, 56.36, 46.03, 41.77, 31.31, 30.08, 21.03; IR (film):  $\nu$  (cm<sup>-1</sup>) 3062, 3010, 2952, 2866, 1736, 1589, 1578, 1483, 1464, 1412, 1394, 1381, 1364, 1280, 1226, 1165, 1137, 1037, 1025, 978, 945, 913, 852, 811; HR-MS (ESI)  $m/z$  calcd for C<sub>16</sub>H<sub>23</sub>BrO<sub>3</sub>Na [M + Na<sup>+</sup>]: 365.07228, found 365.07231.

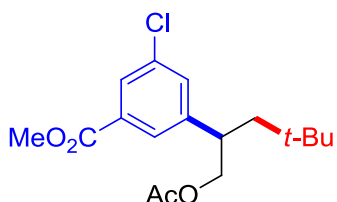

**Methyl 3-(1-acetoxy-4,4-dimethylpentan-2-yl)-5-chlorobenzoate (12).** White solid. <sup>1</sup>H NMR (400 MHz, CDCl<sub>3</sub>)  $\delta$  7.88 (t,  $J$  = 1.6 Hz, 1H), 7.80 (t,  $J$  = 1.6 Hz, 1H), 7.40 (t,  $J$  = 2.0 Hz, 1H), 4.14 (dd,  $J$  = 10.8, 6.4 Hz, 1H), 4.04 (dd,  $J$  = 9.7, 8.0 Hz, 1H), 3.93 (s, 3H), 3.10 – 3.04 (m, 1H), 1.97 (s, 3H), 1.70 (dd,  $J$  = 14.4, 8.0 Hz, 1H), 1.57 (dd,  $J$  = 14.4, 4.0 Hz, 1H), 0.83 (s, 9H); <sup>13</sup>C NMR (101 MHz, CDCl<sub>3</sub>)  $\delta$  170.80, 165.90, 146.52, 134.46, 132.62, 131.89, 127.88, 127.46, 69.08, 52.39, 45.73, 41.39, 31.20, 29.93, 20.79; IR (film):  $\nu$  (cm<sup>-1</sup>) 3059, 3020, 2953, 1728, 1448, 1365, 1287, 1227, 1036, 770; HR-MS (ESI)  $m/z$  calcd for C<sub>17</sub>H<sub>23</sub>ClO<sub>4</sub>Na [M + Na<sup>+</sup>]: 349.11771, found 349.11778.

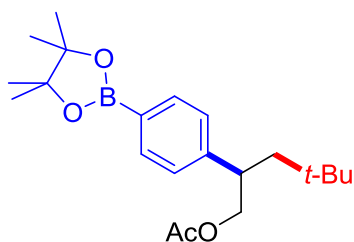

**4,4-Dimethyl-2-(4-(4,4,5,5-tetramethyl-1,3,2-dioxaborolan-2-yl)phenyl)pentyl**

**acetate (13).** Colorless oil.  $^1\text{H}$  NMR (400 MHz,  $\text{CDCl}_3$ )  $\delta$  7.74 (d,  $J$  = 8.1 Hz, 1H), 7.23 (d,  $J$  = 8.0 Hz, 2H), 4.12 (dd,  $J$  = 10.7, 6.8 Hz, 2H), 4.05 (dd,  $J$  = 10.7, 7.7 Hz, 1H), 3.03 (ddd,  $J$  = 15.2, 7.8, 3.4 Hz, 1H), 1.95 (s, 3H), 1.72 (dd,  $J$  = 14.1, 8.4 Hz, 1H), 1.57 (dd,  $J$  = 14.1, 3.4 Hz, 1H), 1.34 (s, 12H), 0.80 (s, 9H);  $^{13}\text{C}$  NMR (101 MHz,  $\text{CDCl}_3$ )  $\delta$  171.11, 147.39, 135.06, 127.70, 83.84, 69.71, 45.90, 42.00, 31.30, 30.11, 25.06, 25.00, 21.03; IR (film):  $\nu$  ( $\text{cm}^{-1}$ ) 3047, 2976, 2954, 2867, 1739, 1611, 1560, 1516, 1467, 1448, 1398, 1358, 1321, 1266, 1228, 1187, 1165, 1143, 1106, 1092, 1034, 1020, 962, 920, 888, 859, 828; HR-MS (ESI)  $m/z$  calcd for  $\text{C}_{21}\text{H}_{33}\text{O}_4\text{BNa}$  [ $\text{M} + \text{Na}^+$ ]: 383.23641, found 383.23679.

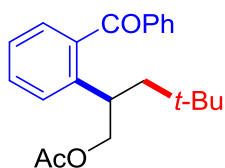

**2-(2-Benzoylphenyl)-4,4-dimethylpentyl acetate (14).** Colorless oil.  $^1\text{H}$  NMR (400 MHz,  $\text{CDCl}_3$ )  $\delta$  7.86 – 7.81 (m, 2H), 7.61 – 7.56 (m, 1H), 7.50 – 7.42 (m, 4H), 7.29 – 7.25 (m, 2H), 4.20 (dd,  $J$  = 10.7, 6.2 Hz, 1H), 4.01 (dd,  $J$  = 10.7, 7.4 Hz, 1H), 3.49 – 3.39 (m, 1H), 1.86 (s, 3H), 1.78 (dd,  $J$  = 14.2, 7.8 Hz, 1H), 1.61 (dd,  $J$  = 14.2, 4.2 Hz, 1H), 0.79 (s, 9H);  $^{13}\text{C}$  NMR (101 MHz,  $\text{CDCl}_3$ )  $\delta$  198.35, 171.10, 143.41, 138.99, 138.12, 133.34, 130.61, 130.41, 128.86, 128.49, 128.23, 125.51, 70.10, 46.35, 36.50, 31.37, 30.06, 21.00; IR (film):  $\nu$  ( $\text{cm}^{-1}$ ) 3060, 3022, 2953, 2907, 2866, 1737, 1664, 1596, 1579, 1468, 1448, 1382, 1365, 1315, 1285, 1264, 1241, 1179, 1152, 1073, 1034, 1001, 975, 927, 891, 847; HR-MS (ESI)  $m/z$  calcd for  $\text{C}_{22}\text{H}_{26}\text{O}_3\text{Na}$  [ $\text{M} + \text{Na}^+$ ]: 361.17742, found 361.17732.

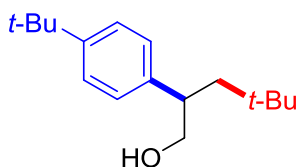

**2-(4-(*tert*-Butyl)phenyl)-4,4-dimethylpentan-1-ol (15).** Yellow oil.  $^1\text{H}$  NMR (400 MHz,  $\text{CDCl}_3$ )  $\delta$  7.32 (d,  $J$  = 8.4 Hz, 1H), 7.15 (d,  $J$  = 8.3 Hz, 1H), 3.67 (dd,  $J$  = 10.6, 5.7 Hz, 1H), 3.58 (dd,  $J$  = 10.6, 8.7 Hz, 1H), 2.90 – 2.80 (m, 1H), 1.64 (dd,  $J$  = 14.0, 7.9 Hz, 1H), 1.50 (dd,  $J$  = 14.0, 3.8 Hz, 1H), 1.31 (s, 9H), 0.83 (s, 9H);  $^{13}\text{C}$  NMR (101 MHz,  $\text{CDCl}_3$ )  $\delta$  149.49, 141.07, 127.99, 125.63, 69.15, 45.98, 44.91, 34.53, 31.55, 31.30, 30.16; IR (film):  $\nu$  ( $\text{cm}^{-1}$ ) 3352, 3088, 3052, 3026, 2953, 2906, 2866, 1511, 1474, 1466, 1412, 1393, 1364, 1269, 1245, 1202, 1120, 1062, 1031, 1002, 945, 908, 871, 829; HR-MS (EI)  $m/z$  calcd for  $\text{C}_{17}\text{H}_{28}\text{O}$  [ $\text{M}^+$ ]: 248.21347, found 248.21363.

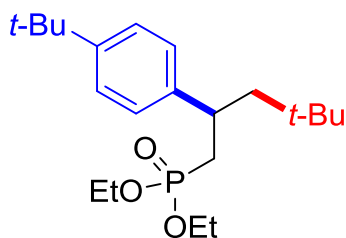

**Diethyl (2-(4-(*tert*-butyl)phenyl)-4,4-dimethylpentyl)phosphonate (16).** Yellow oil.  $^1\text{H}$  NMR (400 MHz,  $\text{CDCl}_3$ )  $\delta$  7.26 (d,  $J$  = 8.3 Hz, 2H), 7.14 (d,  $J$  = 8.3 Hz, 2H), 3.97 – 3.76 (m, 3H), 3.75 – 3.63 (m, 1H), 3.21 – 3.01 (m, 1H), 2.10 – 1.96 (m, 2H), 1.78 – 1.65 (m, 2H), 1.28 (s, 9H), 1.16 (t,  $J$  = 7.1 Hz, 3H), 1.10 (t,  $J$  = 7.1 Hz, 3H), 0.77 (s, 9H);  $^{13}\text{C}$  NMR (101 MHz,  $\text{CDCl}_3$ )  $\delta$  149.17, 143.40 (d,  $J$  = 7.3 Hz), 127.46, 125.23, 61.27 (d,  $J$  = 6.5 Hz), 61.08 (d,  $J$  = 6.3 Hz), 51.46 (d,  $J$  = 12.9 Hz), 36.71 (d,  $J$  = 3.4 Hz), 35.94 (d,  $J$  = 137.2 Hz), 34.47, 31.54, 31.50, 30.15, 16.38 (d,  $J$  = 6.4 Hz); IR (film):  $\nu$  ( $\text{cm}^{-1}$ ) 3051, 3022, 2953, 2904, 2866, 1511, 1475, 1444, 1408, 1393, 1364, 1294, 1244, 1162, 1097, 1054, 1027, 958, 892, 850, 827; HR-MS (ESI)  $m/z$  calcd for  $\text{C}_{11}\text{H}_{38}\text{O}_3\text{P}$  [ $\text{M} + \text{H}^+$ ]: 369.25531, found 369.25480.

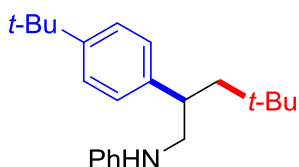

***N*-(2-(4-(*tert*-Butyl)phenyl)-4,4-dimethylpentyl)aniline (17).** Yellow oil.  $^1\text{H}$  NMR (400 MHz,  $\text{CDCl}_3$ )  $\delta$  7.32 (d,  $J$  = 8.3 Hz, 2H), 7.19 – 7.11 (m, 4H), 6.69 (t,  $J$  = 7.3 Hz, 1H), 6.60 – 6.49 (m, 2H), 3.51 (brs, 1H), 3.36 (dd,  $J$  = 12.0, 5.5 Hz, 1H), 3.10 (dd,  $J$  = 12.0, 9.4 Hz, 1H), 3.01 – 2.88 (m, 1H), 1.77 (dd,  $J$  = 14.0, 7.9 Hz, 1H), 1.60 (dd,  $J$  = 14.0, 3.6

Hz, 1H), 1.33 (s, 9H), 0.84 (s, 9H);  $^{13}\text{C}$  NMR (101 MHz,  $\text{CDCl}_3$ )  $\delta$  149.35, 148.30, 141.95, 129.31, 127.71, 125.58, 117.40, 113.25, 51.78, 48.21, 41.50, 34.54, 31.56, 31.47, 30.19; IR (film):  $\nu$  ( $\text{cm}^{-1}$ ) 3417, 3086, 3051, 3022, 2954, 2904, 2865, 1601, 1505, 1473, 1430, 1412, 1394, 1363, 1319, 1265, 1201, 1179, 1154, 1109, 1072, 1017, 991, 968, 912, 865, 831; HR-MS (ESI)  $m/z$  calcd for  $\text{C}_{23}\text{H}_{34}\text{N}$  [ $\text{M} + \text{H}^+$ ]: 324.26858, found 324.26850.

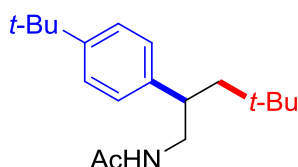

***N*-(2-(4-(*tert*-Butyl)phenyl)-4,4-dimethylpentyl)acetamide (18).** White solid.  $^1\text{H}$  NMR (400 MHz,  $\text{CDCl}_3$ )  $\delta$  7.31 (d,  $J$  = 8.3 Hz, 2H), 7.09 (d,  $J$  = 8.3 Hz, 2H), 5.19 (br s, 1H), 3.79 – 3.62 (m, 1H), 3.08 – 2.93 (m, 1H), 2.86 – 2.74 (m, 1H), 1.85 (s, 3H), 1.66 (dd,  $J$  = 14.0, 7.8 Hz, 1H), 1.50 (dd,  $J$  = 14.0, 3.9 Hz, 1H), 1.31 (s, 9H), 0.81 (s, 9H);  $^{13}\text{C}$  NMR (101 MHz,  $\text{CDCl}_3$ )  $\delta$  169.97, 149.50, 141.61, 127.64, 125.65, 47.72, 47.02, 41.89, 34.54, 31.53, 31.34, 30.13, 23.46; IR (film):  $\nu$  ( $\text{cm}^{-1}$ ) 3286, 3087, 2958, 2901, 2869, 1650, 1556, 1510, 1466, 1435, 1407, 1394, 1364, 1288, 1268, 1249, 1241, 1164, 1101, 1075, 1066, 1054, 1018, 908, 880, 870, 829; HR-MS (ESI)  $m/z$  calcd for  $\text{C}_{19}\text{H}_{32}\text{NO}$  [ $\text{M} + \text{H}^+$ ]: 290.24784, found 290.24783.

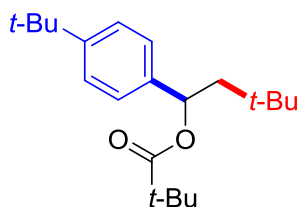

**1-(4-(*tert*-Butyl)phenyl)-3,3-dimethylbutyl pivalate (19).** Colorless oil.  $^1\text{H}$  NMR (400 MHz,  $\text{CDCl}_3$ )  $\delta$  7.31 (d,  $J$  = 8.4 Hz, 2H), 7.20 (d,  $J$  = 8.3 Hz, 2H), 5.81 (dd,  $J$  = 9.3, 2.6 Hz, 1H), 1.96 (dd,  $J$  = 14.9, 9.3 Hz, 1H), 1.57 (dd,  $J$  = 14.9, 2.7 Hz, 1H), 1.30 (s, 9H), 1.18 (s, 9H), 0.95 (s, 9H);  $^{13}\text{C}$  NMR (101 MHz,  $\text{CDCl}_3$ )  $\delta$  177.60, 150.16, 140.02, 125.45, 125.28, 73.70, 50.49, 38.56, 34.46, 31.34, 30.45, 29.93, 27.09; IR (film):  $\nu$  ( $\text{cm}^{-1}$ ) 3058, 3029, 2956, 2905, 2869, 1727, 1511, 1478, 1464, 1412, 1395, 1365, 1317, 1280, 1245, 1216, 1202, 1150, 1119, 1109, 1079, 1045, 1029, 1021, 963, 940, 924, 896, 860, 830; HR-MS (ESI)  $m/z$  calcd for  $\text{C}_{21}\text{H}_{34}\text{O}_2\text{Na}$  [ $\text{M} + \text{Na}^+$ ]: 341.24510, found 341.24526.

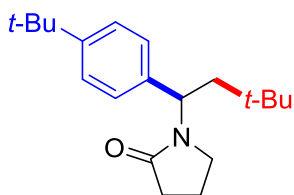

**1-(1-(4-(*tert*-Butyl)phenyl)-3,3-dimethylbutyl)pyrrolidin-2-one (20).** White solid.  $^1\text{H}$  NMR (400 MHz,  $\text{CDCl}_3$ )  $\delta$  7.31 (d,  $J$  = 8.4 Hz, 2H), 7.24 (d,  $J$  = 8.4 Hz, 2H), 5.47 (dd,  $J$  = 9.6, 4.0 Hz, 1H), 3.44 – 3.35 (m, 1H), 3.09 – 2.96 (m, 1H), 2.42 – 2.22 (m, 2H), 1.98 – 1.82 (m, 3H), 1.78 (dd,  $J$  = 14.4, 4.1 Hz, 1H), 1.30 (s, 9H), 0.96 (s, 9H);  $^{13}\text{C}$  NMR (101 MHz,  $\text{CDCl}_3$ )  $\delta$  174.31, 150.29, 138.17, 127.42, 125.41, 50.98, 43.05, 42.51, 34.57, 31.79, 31.46, 30.81, 29.89, 17.98; IR (film):  $\nu$  ( $\text{cm}^{-1}$ ) 3051, 3027, 2952, 2905, 2867, 1681, 1512, 1476, 1461, 1419, 1363, 1281, 1268, 1243, 1223, 1201, 1165, 1150, 1122, 1109, 1076, 1040, 1018, 998, 934, 915, 895, 860, 840, 824; HR-MS (ESI)  $m/z$  calcd for  $\text{C}_{20}\text{H}_{31}\text{NONa}$  [ $\text{M} + \text{Na}^+$ ]: 324.22979, found 324.22933.

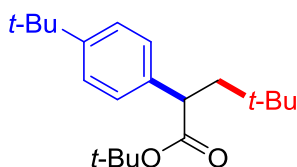

***tert*-Butyl 2-(4-(*tert*-butyl)phenyl)-4,4-dimethylpentanoate (21).** White solid.  $^1\text{H}$  NMR (400 MHz,  $\text{CDCl}_3$ )  $\delta$  7.30 (d,  $J$  = 8.5 Hz, 2H), 7.21 (d,  $J$  = 8.4 Hz, 2H), 3.50 (dd,  $J$  = 9.8, 3.0 Hz, 1H), 2.27 (dd,  $J$  = 14.0, 9.8 Hz, 1H), 1.47 (dd,  $J$  = 14.0, 3.0 Hz, 1H), 1.38 (s, 9H), 1.30 (s, 9H), 0.91 (s, 9H);  $^{13}\text{C}$  NMR (101 MHz,  $\text{CDCl}_3$ )  $\delta$  174.27, 149.55, 138.75, 127.31, 125.48, 80.38, 48.87, 47.58, 34.53, 31.52, 31.19, 29.64, 28.05. IR (film):  $\nu$  ( $\text{cm}^{-1}$ ) 3093, 3057, 3022, 2956, 2906, 2868, 1730, 1508, 1477, 1392, 1366, 1251, 1216, 1163, 1142, 1020, 962, 941, 843, 831; HR-MS (EI)  $m/z$  calcd for  $\text{C}_{21}\text{H}_{34}\text{O}_2$  [ $\text{M}^+$ ]: 318.25533, found 318.25578.

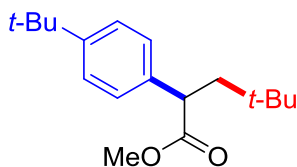

**Methyl 2-(4-(*tert*-butyl)phenyl)-4,4-dimethylpentanoate (22).** Yellow oil.  $^1\text{H}$  NMR (400 MHz,  $\text{CDCl}_3$ )  $\delta$  7.31 (d,  $J$  = 8.4 Hz, 2H), 7.24 (d,  $J$  = 8.4 Hz, 2H), 3.69 – 3.60 (m, 4H), 2.32 (dd,  $J$  = 14.0, 9.7 Hz, 1H), 1.56 (dd,  $J$  = 14.0, 3.4 Hz, 1H), 1.30 (s, 9H), 0.90 (s, 9H);  $^{13}\text{C}$  NMR (101 MHz,  $\text{CDCl}_3$ )  $\delta$  175.57, 149.98, 138.01, 127.46, 125.65, 52.08, 47.69, 47.66, 34.56, 31.49, 31.12, 29.50; IR (film):  $\nu$  ( $\text{cm}^{-1}$ ) 3091, 3058, 3020, 2953,

1737, 1476, 1465, 1435, 1365, 1281, 1270, 1241, 1211, 1196, 1165, 1150, 910, 833; HR-MS (ESI)  $m/z$  calcd for  $C_{18}H_{28}O_2Na$  [ $M + Na^+$ ]: 299.19815, found 299.19765.

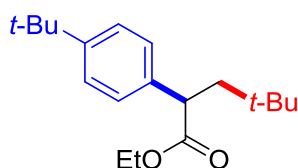

**Ethyl 2-(4-(*tert*-butyl)phenyl)-4,4-dimethylpentanoate (23).** Yellow oil.  $^1H$  NMR (400 MHz,  $CDCl_3$ )  $\delta$  7.32 (d,  $J = 8.5$  Hz, 2H), 7.25 (d,  $J = 8.4$  Hz, 2H), 4.15 (dq,  $J = 10.9$ , 7.1 Hz, 1H), 4.04 (dq,  $J = 10.8$ , 7.1 Hz, 1H), 3.62 (dd,  $J = 9.8$ , 3.2 Hz, 1H), 2.33 (dd,  $J = 14.0$ , 9.8 Hz, 1H), 1.55 (dd,  $J = 14.0$ , 3.2 Hz, 1H), 1.31 (s, 9H), 1.22 (t,  $J = 7.1$  Hz, 3H), 0.91 (s, 9H);  $^{13}C$  NMR (101 MHz,  $CDCl_3$ )  $\delta$  175.10, 149.86, 138.20, 127.44, 125.59, 60.76, 47.88, 47.70, 34.54, 31.49, 31.16, 29.54, 14.19; IR (film):  $\nu$  ( $cm^{-1}$ ) 3092, 3059, 3023, 2954, 2905, 2867, 1733, 1476, 1465, 1366, 1280, 1270, 1241, 1210, 1194, 1170, 1148, 1027, 829; HR-MS (ESI)  $m/z$  calcd for  $C_{19}H_{30}O_2Na$  [ $M + Na^+$ ]: 313.21380, found 313.21373.

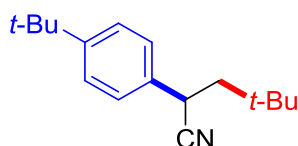

**2-(4-(*tert*-Butyl)phenyl)-4,4-dimethylpentanenitrile (24).** Colorless oil.  $^1H$  NMR (400 MHz,  $CDCl_3$ )  $\delta$  7.38 (d,  $J = 8.4$  Hz, 2H), 7.25 (d,  $J = 8.4$  Hz, 2H), 3.72 (dd,  $J = 10.4$ , 3.4 Hz, 1H), 2.04 (dd,  $J = 14.2$ , 10.4 Hz, 1H), 1.65 (dd,  $J = 14.2$ , 3.4 Hz, 1H), 1.31 (s, 9H), 1.05 (s, 9H);  $^{13}C$  NMR (101 MHz,  $CDCl_3$ )  $\delta$  151.01, 134.92, 126.92, 126.16, 122.42, 50.40, 34.66, 32.89, 31.41, 31.27, 29.51; IR (film):  $\nu$  ( $cm^{-1}$ ) 3057, 3033, 2959, 2905, 2868, 2238, 1513, 1476, 1411, 1397, 1367, 1268, 1108, 1019, 831; HR-MS (EI)  $m/z$  calcd for  $C_{17}H_{25}N$  [ $M^+$ ]: 243.19815, found 243.19824.



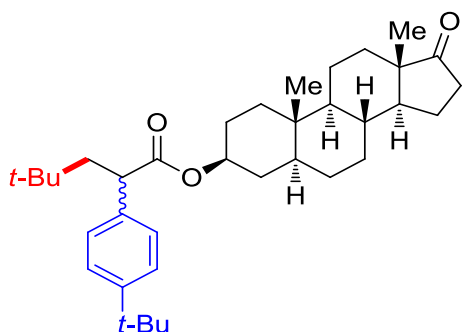

**(3S,5S,8R,9S,10S,13S,14S)-10,13-Dimethyl-17-oxohexadecahydro-1H-cyclopenta[a]phenanthren-3-yl 2-(4-(tert-butyl)phenyl)-4,4-dimethylpentanoate (dr = 1:1) (25).**<sup>9</sup> Colorless oil. <sup>1</sup>H NMR (400 MHz, CDCl<sub>3</sub>) δ 7.30 (d, *J* = 8.4 Hz, 2H), 7.23 (d, *J* = 8.4 Hz, 2H), 4.71 – 4.59 (m, 1H), 3.57 (dd, *J* = 10.0, 2.8 Hz, 1H), 2.42 (dd, *J* = 19.2, 8.9 Hz, 1H), 2.31 (dd, *J* = 13.9, 10.0 Hz, 1H), 2.12 – 1.99 (m, 1H), 1.85 – 1.12 (m, 17H), 1.29 (s, 9H), 1.08 – 0.87 (m, 3H), 0.91 (s, 9H), 0.85 (s, 3H), 0.84 (s, 3H), 0.76 – 0.65 (m, 1H); <sup>13</sup>C NMR (101 MHz, CDCl<sub>3</sub>) δ 221.12, 174.47, 149.58, 138.21, 127.18, 125.37, 73.58, 54.27, 51.34, 47.94, 47.91, 47.73, 47.52, 47.48, 44.66, 44.65, 36.66, 36.63, 35.80, 35.62, 35.00, 34.35, 33.68, 33.63, 31.49, 31.31, 31.01, 30.78, 29.42, 28.25, 28.20, 27.23, 27.17, 21.73, 20.42, 13.77, 12.21 ; IR (film): ν (cm<sup>-1</sup>) 2950, 1732, 1365, 1148, 1013, 910, 731; HR-MS (EI) *m/z* calcd for C<sub>36</sub>H<sub>54</sub>O<sub>3</sub> [M<sup>+</sup>]: 557.39652, found 557.39624.

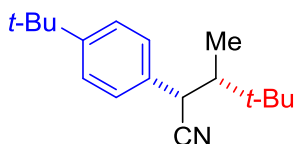

**2-(4-(tert-Butyl)phenyl)-3,4,4-trimethylpentanenitrile (26) (dr > 20:1).** Colorless oil. <sup>1</sup>H NMR (400 MHz, CDCl<sub>3</sub>) δ 7.39 (d, *J* = 8.4 Hz, 2H), 7.26 (d, *J* = 8.4 Hz, 2H), 4.13 (d, *J* = 1.5 Hz, 1H), 1.59 (qd, *J* = 7.0, 1.9 Hz, 1H), 1.32 (s, 9H), 1.08 (s, 9H), 1.01 (d, *J* = 7.0 Hz, 3H); <sup>13</sup>C NMR (101 MHz, CDCl<sub>3</sub>) δ 150.70, 134.12, 127.27, 125.85, 120.17, 49.74, 38.13, 34.64, 33.91, 31.44, 27.87, 10.51; IR (film): ν (cm<sup>-1</sup>) 3055, 3027, 2962, 2904, 2870, 2238, 1508, 1470, 1414, 1400, 1380, 1366, 1268, 1221, 1202, 1108, 1053, 1019, 995, 932, 902, 844; HR-MS (EI) *m/z* calcd for C<sub>19</sub>H<sub>30</sub>O<sub>2</sub>Na [M<sup>+</sup>]: 257.21380, found 257.21337.

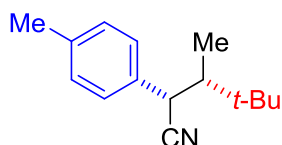

**3,4,4-Trimethyl-2-(p-tolyl)pentanenitrile (27) (dr > 20:1).** Colorless oil.  $^1\text{H}$  NMR (400 MHz,  $\text{CDCl}_3$ )  $\delta$  7.22 (d,  $J$  = 8.2 Hz, 2H), 7.18 (d,  $J$  = 8.1 Hz, 2H), 4.13 (d,  $J$  = 1.5 Hz, 1H), 1.57 (qd,  $J$  = 7.0, 2.0 Hz, 1H), 0.99 (d,  $J$  = 7.0 Hz, 3H);  $^{13}\text{C}$  NMR (101 MHz,  $\text{CDCl}_3$ )  $\delta$  137.44, 134.19, 129.60, 127.46, 120.16, 49.89, 38.23, 33.91, 27.88, 21.12, 10.41; IR (film):  $\nu$  ( $\text{cm}^{-1}$ ) 3056, 3024, 2965, 2238, 1541, 1469, 1415, 1400, 1380, 1369, 1320, 1261, 1222, 1188, 1122, 1101, 1077, 1053, 1022, 994, 964, 913, 892, 880, 834; HR-MS (EI)  $m/z$  calcd for  $\text{C}_{15}\text{H}_{21}\text{N}$  [ $\text{M}^+$ ]: 215.16685, found 215.16665.

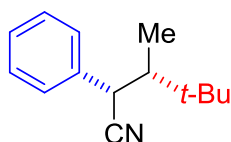

**3,4,4-Trimethyl-2-phenylpentanenitrile (28) (dr > 20:1).** Colorless oil.  $^1\text{H}$  NMR (400 MHz,  $\text{CDCl}_3$ )  $\delta$  7.43 – 7.26 (m, 5H), 4.16 (d,  $J$  = 1.7 Hz, 1H), 1.60 (qd,  $J$  = 7.0, 2.0 Hz, 1H), 1.09 (s, 9H), 1.00 (d,  $J$  = 7.0 Hz, 3H);  $^{13}\text{C}$  NMR (101 MHz,  $\text{CDCl}_3$ )  $\delta$  137.18, 128.94, 127.68, 127.59, 119.97, 49.85, 38.61, 33.93, 27.87, 10.39; IR (film):  $\nu$  ( $\text{cm}^{-1}$ ) 3082, 3062, 2964, 2891, 2239, 1598, 1495, 1470, 1453, 1380, 1369, 1219, 1102, 757, 717; HR-MS (EI)  $m/z$  calcd for  $\text{C}_{14}\text{H}_{19}\text{N}$  [ $\text{M}^+$ ]: 201.15120, found 201.15100.

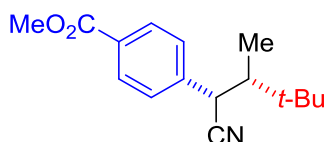

**Methyl 4-(1-cyano-2,3,3-trimethylbutyl)benzoate (29) (dr > 20:1).** White solid.  $^1\text{H}$  NMR (400 MHz,  $\text{CDCl}_3$ )  $\delta$  8.04 (d,  $J$  = 8.4 Hz, 2H), 7.41 (d,  $J$  = 8.2 Hz, 2H), 4.20 (d,  $J$  = 1.8 Hz, 1H), 3.92 (s, 3H), 1.60 (qd,  $J$  = 7.0, 2.0 Hz, 1H), 1.09 (s, 9H), 0.98 (d,  $J$  = 7.0 Hz, 3H);  $^{13}\text{C}$  NMR (101 MHz,  $\text{CDCl}_3$ )  $\delta$  166.62, 142.15, 130.25, 129.78, 127.70, 119.39, 52.36, 49.84, 38.75, 34.04, 27.86, 10.44; IR (film):  $\nu$  ( $\text{cm}^{-1}$ ) 3080, 3063, 2964, 2241, 1724, 1611, 1471, 1434, 1415, 1381, 1369, 1280, 1218, 1185, 1110, 1020, 969, 943, 914, 861, 823; HR-MS (ESI)  $m/z$  calcd for  $\text{C}_{16}\text{H}_{21}\text{NO}_2\text{Na}$  [ $\text{M} + \text{Na}^+$ ]: 282.14645, found 282.14643.

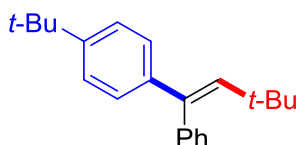

**(E)-1-(tert-Butyl)-4-(3,3-dimethyl-1-phenylbut-1-en-1-yl)benzene (30).** Colorless oil.  $^1\text{H}$  NMR (400 MHz,  $\text{CDCl}_3$ )  $\delta$  7.36 – 7.28 (m, 3H), 7.25 (d,  $J$  = 8.7 Hz, 2H), 7.21 – 7.18 (m, 2H), 7.12 (d,  $J$  = 8.7 Hz, 2H), 6.09 (s, 1H), 1.28 (s, 9H), 0.95 (s, 9H);  $^{13}\text{C}$  NMR (101 MHz,  $\text{CDCl}_3$ )  $\delta$  149.65, 141.22, 141.03, 139.53, 138.80, 130.51, 127.85, 126.79, 126.49, 125.06, 34.51, 34.06, 31.49, 31.47. The experimental data match with those reported in the literature.<sup>10</sup>

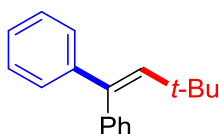

**(3,3-Dimethylbut-1-ene-1,1-diyl)dibenzene (31).** Colorless oil.  $^1\text{H}$  NMR (400 MHz,  $\text{CDCl}_3$ )  $\delta$  7.29 – 7.18 (m, 3H), 7.18 – 6.98 (m, 7H), 6.01 (s, 1H), 0.88 (s, 9H);  $^{13}\text{C}$  NMR (101 MHz,  $\text{CDCl}_3$ )  $\delta$  144.23, 140.91, 140.23, 139.19, 130.49, 128.12, 127.88, 126.99, 126.87, 126.69, 34.12, 31.47. The experimental data match with those reported in the literature.<sup>11</sup>

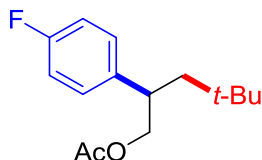

**4,4-Dimethyl-2-(4-fluorophenyl)pentyl acetate (32).** Colorless oil.  $^1\text{H}$  NMR (400 MHz,  $\text{CDCl}_3$ )  $\delta$  7.17 (dd,  $J$  = 8.7, 5.4 Hz, 2H), 6.97 (t,  $J$  = 8.7 Hz, 2H), 4.08 (dd,  $J$  = 9.1, 5.3 Hz, 1H), 4.04 (dd,  $J$  = 9.1, 5.9 Hz, 1H), 3.06 – 2.96 (m, 1H), 1.96 (s, 3H), 1.64 (d,  $J$  = 8.4 Hz, 1H), 1.57 (dd,  $J$  = 14.1, 3.6 Hz, 1H), 0.81 (s, 9H);  $^{13}\text{C}$  NMR (101 MHz,  $\text{CDCl}_3$ )  $\delta$  171.04, 161.70 (d,  $J$  = 244.3 Hz), , 139.62 (d,  $J$  = 3.1 Hz), 129.53 (d,  $J$  = 7.8 Hz), 115.34 (d,  $J$  = 21.1 Hz), 69.72, 46.09, 41.09, 31.26, 30.10, 20.98;  $^{19}\text{F}$  NMR (376 MHz,  $\text{CDCl}_3$ )  $\delta$  -116.74 (tt,  $J$  = 8.8, 5.4 Hz, 1F); IR (film):  $\nu$  ( $\text{cm}^{-1}$ ) 3041, 2954, 2866, 2716, 1737, 1604, 1509, 1468, 1383, 1365, 1223, 1158, 1110, 1034, 910, 832; HR-MS (ESI)  $m/z$  calcd for  $\text{C}_{15}\text{H}_{21}\text{FO}_2\text{Na}[\text{M} + \text{Na}^+]$ : 275.14178, found 275.14215.

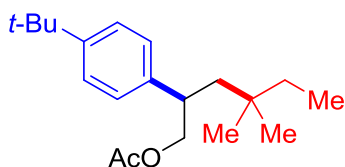

**2-(4-(*tert*-Butyl)phenyl)-4,4-dimethylhexyl acetate (33).** Yellow oil.  $^1\text{H}$  NMR (400 MHz,  $\text{CDCl}_3$ )  $\delta$  7.29 (d,  $J$  = 8.4 Hz, 2H), 7.12 (d,  $J$  = 8.3 Hz, 2H), 4.09 (dd,  $J$  = 9.2, 5.7 Hz, 1H), 4.05 (dd,  $J$  = 9.2, 5.6 Hz, 1H), 3.05 – 2.89 (m, 1H), 1.98 (s, 3H), 1.67 (dd,  $J$  = 14.1, 8.0 Hz, 1H), 1.58 (dd,  $J$  = 14.1, 3.6 Hz, 1H), 1.27 – 1.12 (m, 2H), 0.77 – 0.71 (m, 9H);  $^{13}\text{C}$  NMR (101 MHz,  $\text{CDCl}_3$ )  $\delta$  171.18, 149.31, 140.92, 127.76, 125.32, 69.96, 43.56, 40.73, 34.73, 34.50, 33.73, 31.54, 27.29, 27.24, 21.10, 8.44; IR (film):  $\nu$  ( $\text{cm}^{-1}$ ) 3086, 3054, 3025, 2960, 2904, 2869, 1741, 1511, 1463, 1412, 1381, 1363, 1228, 1121, 1111, 1079, 1032, 976, 946, 934, 912, 891, 879, 829; HR-MS (ESI)  $m/z$  calcd for  $\text{C}_{20}\text{H}_{32}\text{O}_2\text{Na}$  [ $\text{M} + \text{Na}^+$ ]: 327.22945, found 327.22969.

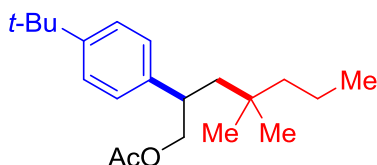

**2-(4-(*tert*-Butyl)phenyl)-4,4-dimethylheptyl acetate (34).** Yellow oil.  $^1\text{H}$  NMR (400 MHz,  $\text{CDCl}_3$ )  $\delta$  7.29 (d,  $J$  = 8.4 Hz, 2H), 7.13 (d,  $J$  = 8.3 Hz, 2H), 4.09 (dd,  $J$  = 8.2, 4.8 Hz, 1H), 4.05 (dd,  $J$  = 8.2, 4.6 Hz, 1H), 3.08 – 2.89 (m, 1H), 1.98 (s, 3H), 1.69 (dd,  $J$  = 14.1, 8.3 Hz, 1H), 1.56 (dd,  $J$  = 14.1, 3.3 Hz, 1H), 1.30 (s, 9H), 1.24 – 1.02 (m, 4H), 0.82 – 0.72 (m, 9H);  $^{13}\text{C}$  NMR (101 MHz,  $\text{CDCl}_3$ )  $\delta$  171.17, 149.32, 140.81, 127.78, 125.31, 69.93, 44.86, 43.75, 40.80, 34.50, 33.75, 31.54, 28.04, 27.94, 21.09, 17.25, 14.92; IR (film):  $\nu$  ( $\text{cm}^{-1}$ ) 3093, 3051, 3020, 2957, 2932, 2870, 1735, 1511, 1466, 1411, 1384, 1364, 1231, 1155, 1121, 1111, 1080, 1032, 979, 908, 856, 830; HR-MS (ESI)  $m/z$  calcd for  $\text{C}_{21}\text{H}_{34}\text{O}_2\text{Na}$  [ $\text{M} + \text{Na}^+$ ]: 341.24510, found 341.24500.

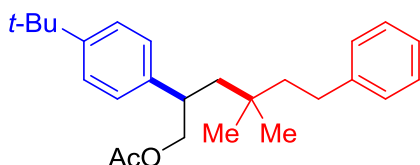

**2-(4-(*tert*-Butyl)phenyl)-4,4-dimethyl-6-phenylhexyl acetate (35).** Colorless oil.  $^1\text{H}$  NMR (400 MHz,  $\text{CDCl}_3$ )  $\delta$  7.36 – 7.31 (m, 2H), 7.25 – 7.11 (m, 5H), 7.00 – 6.93 (m, 2H), 4.10 (d,  $J$  = 7.3 Hz, 2H), 3.04 (qd,  $J$  = 7.4, 2.9 Hz, 1H), 2.55 – 2.43 (m, 1H), 2.41 – 2.29 (m, 1H), 2.00 (s, 3H), 1.85 (dd,  $J$  = 14.2, 8.6 Hz, 1H), 1.66 (dd,  $J$  = 14.2, 2.9 Hz, 1H), 1.48 – 1.36 (m, 2H), 1.33 (s, 9H), 0.90 (s, 3H), 0.90 (s, 3H);  $^{13}\text{C}$  NMR (101 MHz,  $\text{CDCl}_3$ )  $\delta$  171.14, 149.52, 143.37, 140.53, 128.38, 128.33, 127.87, 125.59, 125.49,

69.96, 44.36, 43.33, 40.87, 34.53, 33.91, 31.55, 30.75, 28.23, 28.07, 21.09; IR (film):  $\nu$  ( $\text{cm}^{-1}$ ) 3085, 3061, 3025, 2956, 2905, 2866, 1739, 1603, 1584, 1557, 1510, 1496, 1465, 1455, 1411, 1382, 1363, 1227, 1156, 1111, 1067, 1031, 976, 938, 921, 886, 830; HR-MS (ESI)  $m/z$  calcd for  $\text{C}_{26}\text{H}_{36}\text{O}_2\text{Na}$  [ $\text{M} + \text{Na}^+$ ]: 403.26075, found 403.26101.

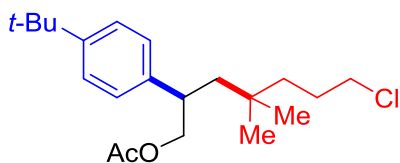

**(2-(4-(*tert*-Butyl)phenyl)-7-chloro-4,4-dimethylheptyl acetate (36).** Yellow oil.  $^1\text{H}$  NMR (400 MHz,  $\text{CDCl}_3$ )  $\delta$  7.30 (d,  $J = 8.4$  Hz, 2H), 7.13 (d,  $J = 8.3$  Hz, 2H), 4.06 (d,  $J = 7.2$  Hz, 2H), 3.30 – 3.17 (m, 2H), 3.04 – 2.92 (m, 1H), 1.99 (s, 3H), 1.73 (dd,  $J = 14.2$ , 8.8 Hz, 1H), 1.68 – 1.44 (m, 3H), 1.31 (s, 9H), 1.28 – 1.08 (m, 2H), 0.82 (s, 3H), 0.79 (s, 3H);  $^{13}\text{C}$  NMR (101 MHz,  $\text{CDCl}_3$ )  $\delta$  171.11, 149.59, 140.33, 127.78, 125.42, 69.78, 45.67, 43.38, 40.82, 39.17, 34.51, 33.52, 31.51, 28.03, 28.00, 27.80, 21.07; IR (film):  $\nu$  ( $\text{cm}^{-1}$ ) 3088, 3056, 3023, 2957, 2906, 2868, 1740, 1511, 1466, 1412, 1383, 1364, 1312, 1288, 1229, 1111, 1304, 975, 945, 921, 893, 831; HR-MS (ESI)  $m/z$  calcd for  $\text{C}_{21}\text{H}_{33}\text{O}_2\text{Na}$  [ $\text{M} + \text{Na}^+$ ]: 375.20613, found 375.20625.

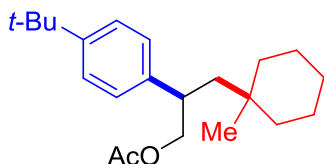

**2-(4-(*tert*-Butyl)phenyl)-3-(1-methylcyclohexyl)propyl acetate (37).** Colorless oil.  $^1\text{H}$  NMR (400 MHz,  $\text{CDCl}_3$ )  $\delta$  7.28 (d,  $J = 8.4$  Hz, 2H), 7.12 (d,  $J = 8.4$  Hz, 2H), 4.09 (dd,  $J = 9.0$ , 5.6 Hz, 1H), 4.05 (dd,  $J = 9.0$ , 5.5 Hz, 1H), 3.06 – 2.95 (m, 1H), 1.98 (s, 3H), 1.70 (dd,  $J = 14.1$ , 7.8 Hz, 1H), 1.60 (dd,  $J = 14.2$ , 3.6 Hz, 1H), 1.47 – 1.35 (m, 3H), 1.30 (s, 9H), 1.31 – 1.22 (m, 5H), 1.15 – 1.07 (m, 2H), 0.77 (s, 3H);  $^{13}\text{C}$  NMR (101 MHz,  $\text{CDCl}_3$ )  $\delta$  171.23, 149.27, 141.13, 127.75, 125.32, 70.01, 40.17, 38.45, 38.37, 34.52, 33.67, 31.55, 26.54, 22.19, 22.08, 21.13; IR (film):  $\nu$  ( $\text{cm}^{-1}$ ) 3088, 3056, 3030, 2952, 2925, 2861, 2849, 1741, 1510, 1461, 1416, 1379, 1362, 1229, 1149, 1111, 1031, 977, 946, 932, 888, 874, 830; HR-MS (ESI)  $m/z$  calcd for  $\text{C}_{22}\text{H}_{34}\text{O}_2\text{Na}$  [ $\text{M} + \text{Na}^+$ ]: 353.24510, found 353.24499.

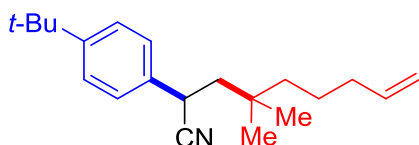

**2-(4-(*tert*-Butyl)phenyl)-4,4-dimethylnon-8-enenitrile (40).** Colorless oil.  $^1\text{H}$  NMR (400 MHz,  $\text{CDCl}_3$ )  $\delta$  7.39 (d,  $J$  = 8.5 Hz, 2H), 7.25 (d,  $J$  = 8.2 Hz, 2H), 5.80 (ddt,  $J$  = 16.9, 10.2, 6.7 Hz, 1H), 5.01 (ddd,  $J$  = 17.1, 3.6, 1.6 Hz, 1H), 4.96 (ddt,  $J$  = 10.2, 2.1, 1.1 Hz, 1H), 3.71 (dd,  $J$  = 10.2, 3.5 Hz, 1H), 2.10 – 1.98 (m, 3H), 1.65 (dd,  $J$  = 14.3, 3.6 Hz, 1H), 1.44 – 1.24 (m, 4H), 1.32 (s, 9H), 1.03 (s, 3H), 1.02 (s, 3H);  $^{13}\text{C}$  NMR (101 MHz,  $\text{CDCl}_3$ )  $\delta$  151.06, 138.86, 135.00, 126.97, 126.20, 122.41, 114.76, 48.29, 41.60, 34.68, 34.46, 33.68, 32.49, 31.42, 27.30, 27.22, 23.50; IR (film):  $\nu$  ( $\text{cm}^{-1}$ ) 3075, 3030, 2959, 2936, 2905, 2868, 2238, 1641, 1512, 1472, 1440, 1412, 1391, 1366, 1318, 1268, 1234, 1202, 1138, 1120, 878, 829; HR-MS (EI)  $m/z$  calcd for  $\text{C}_{21}\text{H}_{31}\text{N}$  [ $\text{M}^+$ ]: 297.24510, found 297.24515.

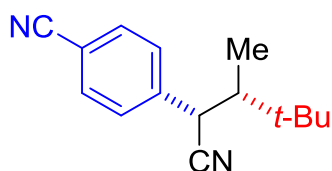

**4-(1-cyano-2,3,3-trimethylbutyl)benzonitrile (44) (dr > 20:1).** Yellow oil.  $^1\text{H}$  NMR (400 MHz,  $\text{CDCl}_3$ )  $\delta$  7.68 (d,  $J$  = 8.3 Hz, 2H), 7.47 (d,  $J$  = 8.3 Hz, 2H), 4.20 (d,  $J$  = 1.5 Hz, 1H), 1.58 (qd,  $J$  = 7.0, 1.9 Hz, 1H), 1.09 (s, 9H), 0.97 (d,  $J$  = 7.0 Hz, 3H);  $^{13}\text{C}$  NMR (101 MHz,  $\text{CDCl}_3$ )  $\delta$  142.43, 132.78, 128.49, 118.81, 118.33, 112.02, 49.89, 38.90, 34.08, 27.81, 10.43; IR (film):  $\nu$  ( $\text{cm}^{-1}$ ) 3065, 3037, 2966, 2884, 2360, 2230, 1609, 1609, 1505, 1472, 1414, 1402, 1382, 1370, 1262, 1218, 1187, 1175, 1120, 1100, 1079, 1053, 1021, 995, 957, 945, 931, 920, 898, 876, 850.

## 5. Control Experiments

### 5.1 Radical Inhibition Experiments

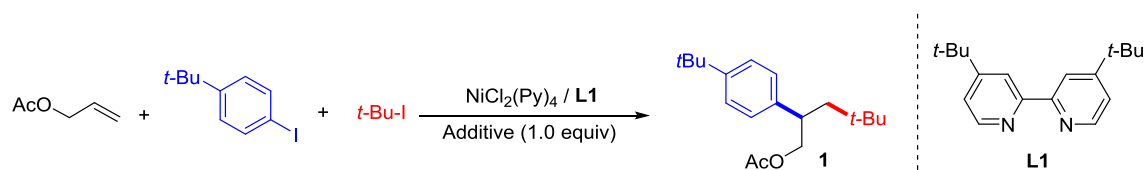

| Additive             | $^1\text{H}$ NMR yield of <b>1</b> |
|----------------------|------------------------------------|
| none                 | 82%                                |
| BHT                  | 23%                                |
| 1,1-Diphenylethylene | 0%                                 |
| 1,4-cyclohexadiene   | 23%                                |

**Experimental procedure:**  $\text{NiCl}_2(\text{Py})_4$  (8.9 mg, 0.02 mmol, 10 mol%), **L1** (5.4 mg, 0.02 mmol, 10 mol%) and additive if solid (BTH, 0.2 mmol, 1.0 equiv) were placed in an oven dried Schlenk-tube. The reaction vessel was evacuated and filled with nitrogen three times. THF (0.5 mL), allyl acetate (20.0 mg, 0.2 mmol, 1.0 equiv), 4-*tert*-butyliodobenzene (104.0 mg, 0.4 mmol, 2.0 equiv), 2-iodo-2-methylpropane (55.2 mg, 0.3 mmol, 1.5 equiv) and additive if liquid (1,1-diphenylethylene or 1,4-cyclohexadiene, 0.2 mmol, 1.0 equiv) were sequentially added and stirred (1400 rpm) one minute at 25 °C. TDAE (0.1 mL, 0.43 mmol, 2.15 equiv) was added dropwise and the reaction stirred for additional 15 h at 25 °C under  $\text{N}_2$ . The resulting mixture was diluted with  $\text{Et}_2\text{O}$  (5 mL) and transferred into a separatory funnel containing aqueous HCl 1M (5 mL). The phases were separated and the aqueous phase extracted with  $\text{Et}_2\text{O}$  (2 x 5 mL). The combined organic layers were dried over anhydrous  $\text{MgSO}_4$  and filtered. After removal of the solvent under reduced pressure *p*-nitroacetophenone (33.0 mg, 0.2 mmol) was added as internal standard, redissolved in  $\text{CDCl}_3$  (1.0 mL) and the crude mixture analyzed by  $^1\text{H}$  NMR.

**Conclusions:** The partial or complete suppression of the reaction suggests the participation of radical species in this transformation.

## 5.2 Radical Clock Experiments (Scheme 3, equations 1 and 2)

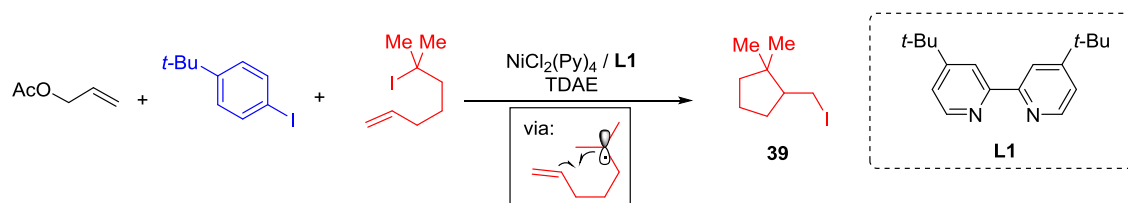

**Experimental procedure:**  $\text{NiCl}_2(\text{Py})_4$  (8.9 mg, 0.02 mmol, 10 mol%) and **L1** (5.4 mg, 0.02 mmol, 10 mol%) were placed in an oven dried Schlenk-tube. The reaction vessel was evacuated and filled with nitrogen three times. THF (0.5 mL), allyl acetate (20.0 mg, 0.2 mmol, 1.0 equiv), 4-*tert*-butyl iodobenzene (104.0 mg, 0.4 mmol, 2.0 equiv) and 6-iodo-6-methylhept-1-ene (71.4 mg, 0.3 mmol, 1.5 equiv) were sequentially added and stirred (1400 rpm) one minute at 25 °C. TDAE (0.1 mL, 0.43 mmol, 2.15 equiv) was added dropwise and the reaction stirred for additional 15 h at 25 °C under  $\text{N}_2$ . The resulting mixture was diluted with  $\text{Et}_2\text{O}$  (5 mL) and transferred into a separatory funnel containing aqueous HCl 1M (5 mL). The phases were separated and the aqueous phase extracted with  $\text{Et}_2\text{O}$  (2 x 5 mL). The combined organic layers were dried over anhydrous  $\text{MgSO}_4$  and filtered. After removal of the solvent under reduced pressure *p*-nitroacetophenone (33.0 mg, 0.2 mmol) was added as internal standard, redissolved in  $\text{CDCl}_3$  (1.0 mL) and the crude mixture analyzed by  $^1\text{H}$  NMR confirming the formation of compound **39** in 17% yield.

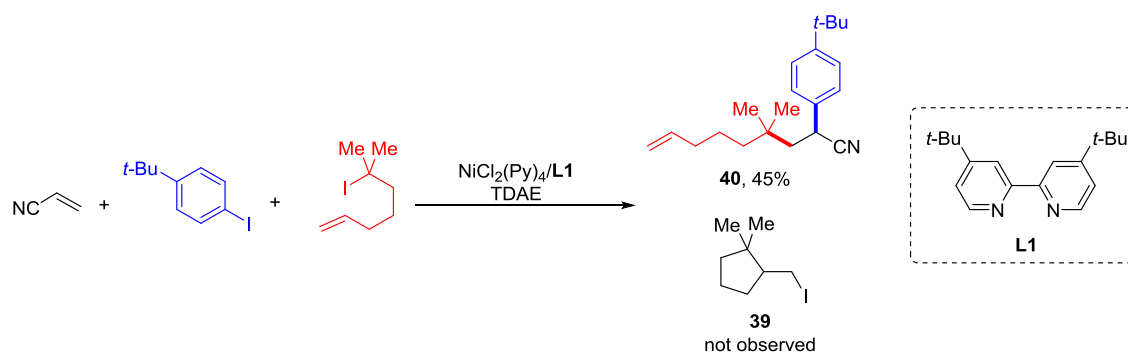

**Experimental procedure:**  $\text{NiCl}_2(\text{Py})_4$  (8.9 mg, 0.02 mmol, 10 mol%) and **L1** (5.4 mg, 0.02 mmol, 10 mol%) were placed in an oven dried Schlenk-tube. The reaction vessel was evacuated and filled with nitrogen three times. THF (0.5 mL), acrylonitrile (15.9 mg, 0.2 mmol, 1.0 equiv), 4-*tert*-butyl iodobenzene (104.0 mg, 0.4 mmol, 2.0 equiv) and 6-iodo-6-methylhept-1-ene (71.4 mg, 0.3 mmol, 1.5 equiv) were sequentially added and stirred (1400 rpm) one minute at 25 °C. TDAE (0.1 mL, 0.43 mmol, 2.15 equiv) was added dropwise and the reaction stirred for additional 15 h at 25 °C under  $\text{N}_2$ . The resulting mixture was diluted with  $\text{Et}_2\text{O}$  (5 mL) and transferred into a separatory funnel



containing aqueous HCl 1M (5 mL). The phases were separated and the aqueous phase extracted with Et<sub>2</sub>O (2 x 5 mL). The combined organic layers were dried over anhydrous MgSO<sub>4</sub> and filtered and after removal of the solvent under reduced the crude product was purified by column chromatography on silica gel to obtain 2-(4-(*tert*-butyl)phenyl)-4,4-dimethylnon-8-enenitrile **40** (26.9 mg, 0.09 mmol, 45% yield) as a yellow oil. Cyclized product **39** was not observed in the reaction mixture.

**Conclusions:** According to previously reported kinetic data,<sup>12</sup> the cyclization of the 1-hexen-5-yl radical takes place approximately 10 times slower than the addition of a tertiary radical to acrylonitrile. In these experiments, the starting iodide produced the cyclized product when an unactivated olefin was used (no addition product detected), whereas the use of acrylonitrile gave exclusively the addition product (no cyclization observed). The different outcome observed in these reactions depending on the degree of activation of the olefin is in agreement with the kinetics of the radical clocks suggesting that the C-Halide bond is homolytically cleaved generating a C-centered radical.

### 5.3 Evaluation of potential intermediates

#### 5.3.1 Evaluation of secondary alkyl iodides

##### a) Reaction in absence of aryl iodide (Scheme 3, equation 5)

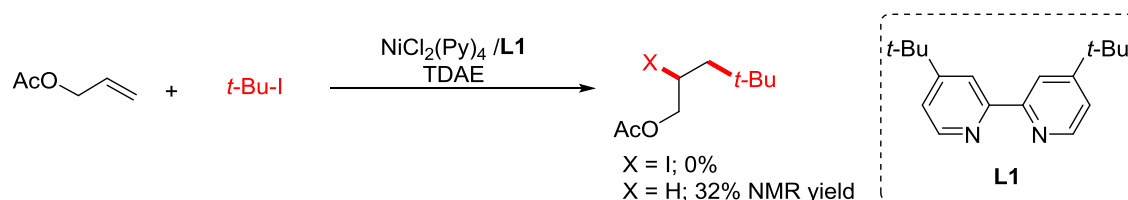

**Experimental procedure:**  $\text{NiCl}_2(\text{Py})_4$  (8.9 mg, 0.02 mmol, 10 mol%) and **L1** (5.4 mg, 0.02 mmol, 10 mol%) were placed in an oven dried Schlenk-tube. The reaction vessel was evacuated and filled with nitrogen three times. THF (0.5 mL), allyl acetate (20.0 mg, 0.2 mmol, 1.0equiv) and 2-iodo-2-methylpropane (55.2 mg, 0.3 mmol, 1.5 equiv) were sequentially added and stirred (1400 rpm) one minute at 25 °C. TDAE (0.1 mL, 0.43 mmol, 2.15 equiv) was added dropwise and the reaction stirred for additional 15 h at 25 °C under N<sub>2</sub>. The resulting mixture was diluted with Et<sub>2</sub>O (5 mL) and transferred into a separatory funnel containing aqueous HCl 1M (5 mL). The phases were separated and the aqueous phase extracted with Et<sub>2</sub>O (2 x 5 mL). The combined organic layers were dried over anhydrous MgSO<sub>4</sub> and filtered. After removal of the solvent under reduced pressure *p*-nitroacetophenone (33.0 mg, 0.2 mmol) was added

as internal standard, redissolved in  $\text{CDCl}_3$  (1.0 mL) and the crude mixture analyzed by  $^1\text{H}$  NMR revealing the formation of hydroalkylation product in 32% yield. Additionally, the same reaction in the absence of Ni showed no conversion for any of the starting materials.

### b) Monitoring the reaction mixture at low conversion

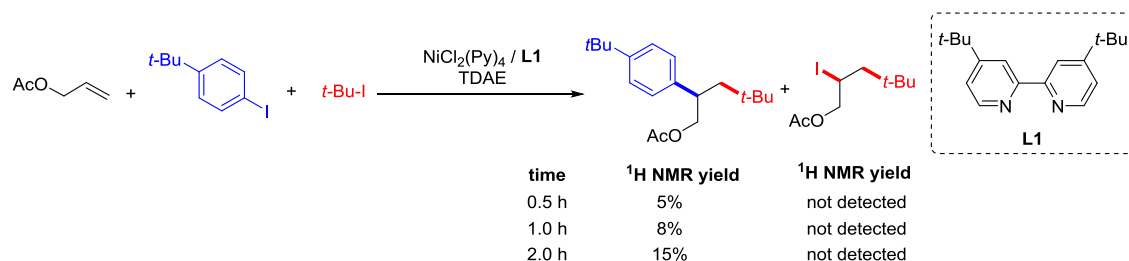

Following the general experimental procedure, three reactions were set up in parallel. After the indicated periods of time the standard work-up was carried out for each of them and the reaction mixtures were analyzed by  $^1\text{H}$  NMR with *p*-nitroacetophenone as internal standard. No alkyl iodide was detected in any of the cases.

### c) Reductive coupling of aryl iodides with secondary alkyl iodides (Scheme 3, equation 3)

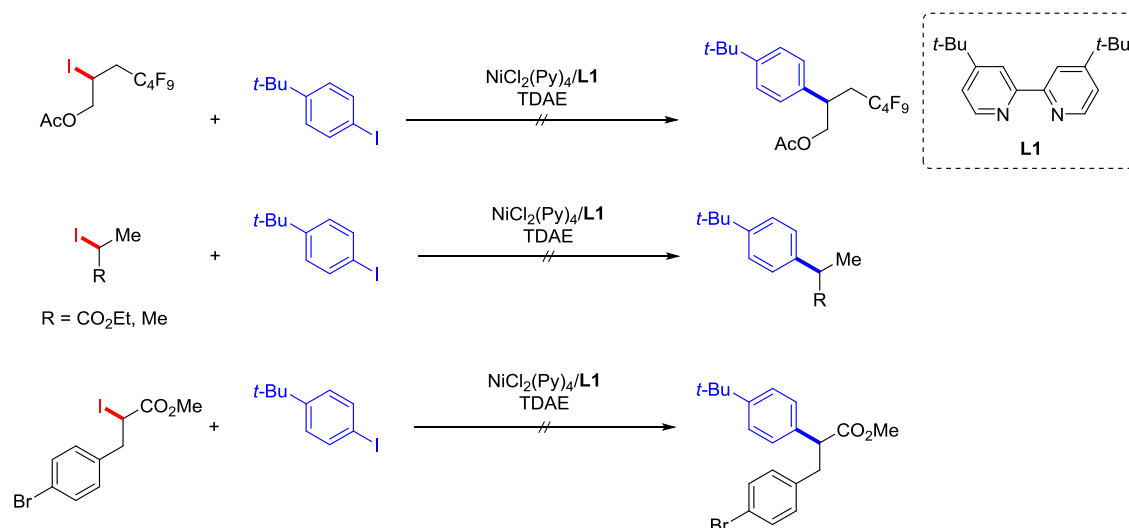

**Experimental procedure:**  $\text{NiCl}_2(\text{Py})_4$  (8.9 mg, 0.02 mmol, 10 mol%) and **L1** (5.4 mg, 0.02 mmol, 10 mol%) were placed in an oven dried Schlenk-tube. The reaction vessel was evacuated and filled with nitrogen three times. THF (0.5 mL), 4-*tert*-butyliodobenzene (104.0 mg, 0.4 mmol, 2.0 equiv) and secondary iodide (0.2 mmol, 1.0 equiv) were sequentially added and stirred (1400 rpm) one minute at 25 °C. TDAE (0.1 mL, 0.43 mmol, 2.15 equiv) was added dropwise and the reaction stirred for

additional 15 h at 25 °C under N<sub>2</sub>. The resulting mixture was diluted with Et<sub>2</sub>O (5 mL) and transferred into a separatory funnel containing aqueous HCl 1M (5 mL). The phases were separated and the aqueous phase extracted with Et<sub>2</sub>O (2 x 5 mL). The combined organic layers were dried over anhydrous MgSO<sub>4</sub> and filtered. After removal of the solvent under reduced pressure *p*-nitroacetophenone (33.0 mg, 0.2 mmol) was added as internal standard, redissolved in CDCl<sub>3</sub> (1.0 mL) and the crude mixture analyzed by <sup>1</sup>H NMR. The corresponding cross-coupling products were not detected in the reaction mixture.

**Conclusions:** The experiments in absence of aryl iodide showed that the nickel catalyst is, to a small extent, able to reduce the alkyl iodide. Although the activation of the alkyl electrophile was possible in absence of the aromatic partner, only hydroalkylation products and no secondary alkyl iodides were detected. In the experiments performed at low conversion, secondary alkyl iodides were not observed either, whereas the reactions using secondary iodides failed to give the coupled product under the reaction conditions. Therefore, these experiments seem to rule out the participation of secondary alkyl iodides in the reaction.

### 5.3.2 Evaluation of Heck type products (Scheme 3, equation 4)

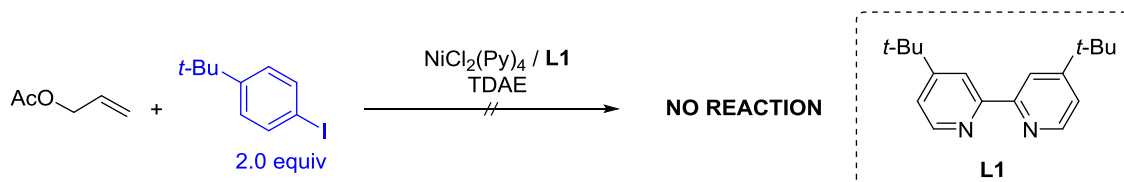

**Experimental procedure:** NiCl<sub>2</sub>(Py)<sub>4</sub> (8.9 mg, 0.02 mmol, 10 mol%) and L1 (5.4 mg, 0.02 mmol, 10 mol%) were placed in an oven dried Schlenk-tube. The reaction vessel was evacuated and filled with nitrogen three times. THF (0.5 mL), allyl acetate (20.0 and 4-*tert*-butyliodobenzene (104.0 mg, 0.4 mmol, 2.0 equiv) were sequentially added and stirred (1400 rpm) one minute at 25 °C. TDAE (0.1 mL, 0.43 mmol, 2.15 equiv) was added dropwise and the reaction stirred for additional 15 h at 25 °C under N<sub>2</sub>. The resulting mixture was diluted with Et<sub>2</sub>O (5 mL) and transferred into a separatory funnel containing aqueous HCl 1M (5 mL). The phases were separated and the aqueous phase extracted with Et<sub>2</sub>O (2 x 5 mL). The combined organic layers were dried over anhydrous MgSO<sub>4</sub> and filtered. After removal of the solvent under reduced pressure *p*-nitroacetophenone (33.0 mg, 0.2 mmol) was added as internal standard, redissolved in CDCl<sub>3</sub> (1.0 mL) and the crude mixture analyzed by <sup>1</sup>H NMR. No reaction was observed.

**Conclusions:** In absence of alkyl iodide no reaction is observed suggesting that Heck type adducts are not intermediates in the reaction.

### 5.3.3 Evaluation of potential nickel intermediates (Scheme 3, equations 7 and 8)

#### a) Reduction of $\text{LNiI}_2$ with TDAE or Zn in the presence of 2-iodotoluene ( $\text{L} = 4,4'$ -di-*tert*-butyl-2,2'-bipyridine)

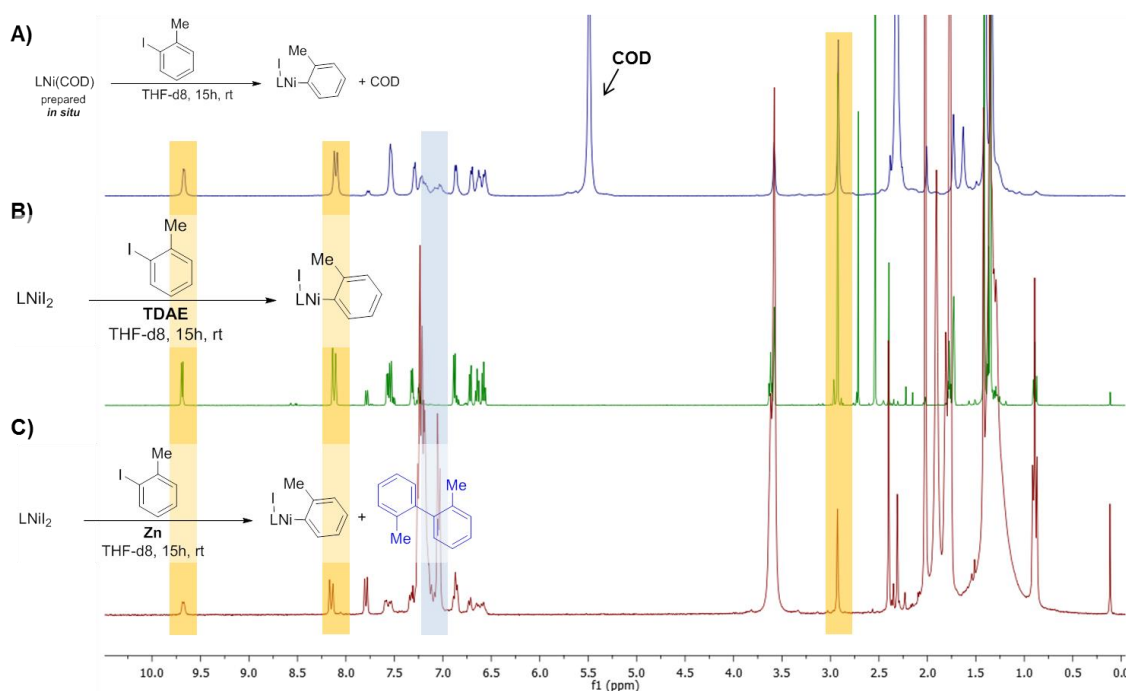

**Experimental procedure for the reaction of  $(\text{dtbbpy})\text{NiI}_2$  with either TDAE or Zn in presence of *o*-iodo toluene (NMR traces B and C):** In a nitrogen filled glove box, a 5 mL vial containing a PTFE-coated stir bar was charged with  $(\text{dtbbpy})\text{NiI}_2$  (58 mg, 0.1 mmol, 1.0 equiv), 2-iodotoluene (15  $\mu\text{L}$ , 0.12 mmol, 1.2 equiv) and THF- $d_8$  (1 mL). After stirring two minutes at 25  $^\circ\text{C}$ , the reductant (0.1 mmol, 1.0 equiv) was added and the mixture stirred overnight at 25  $^\circ\text{C}$  for additional 15h. The mixture was filtered over celite and the filtrate transferred to a J-Young NMR tube and analyzed by  $^1\text{H}$  NMR which showed characteristic signals for the  $\text{arylNi(II)}$  complex **42**<sup>13</sup> (highlighted in orange) together with small amounts of homocoupling product (highlighted in blue).

As a control experiment, complex **42** was also generated in situ by oxidative addition of 2-iodotoluene with  $\text{LNi(COD)}$  (**NMR trace A**): In a nitrogen filled glove box, a 5 mL vial containing a PTFE-coated stir bar was charged with the  $\text{Ni(COD)}_2$  (27.5 mg, 0.1 mmol, 1.0 equiv) and 4,4'-di-*tert*-butyl-2,2'-bipyridine (26.8 mg, 0.1 mmol, 1.0 equiv) and THF- $d_8$  (1 mL) resulting in a deep purple mixture which was stirred overnight at 25  $^\circ\text{C}$ . 2-iodotoluene (15  $\mu\text{L}$ , 0.12 mmol, 1.2 equiv) was added and the deep red mixture stirred

at 25 °C for additional 15h. The mixture was filtered over celite and the filtrate transferred to a J-Young NMR tube and analyzed by  $^1\text{H}$  NMR which showed characteristic signals for the arylNi(II) complex **42** (highlighted in orange) together with small amounts of homocoupling product (highlighted in blue).

**Conclusions:** The formation of the Aryl-Ni(II) complex **42** from a mixture containing  $\text{LNiI}_2$  and aryl iodide upon addition of Zn or TDAE demonstrates the ability of these species to act as reductants for Ni(II) in THF at 25 °C.

## b) Stoichiometric reactions with aryl-nickel(II)

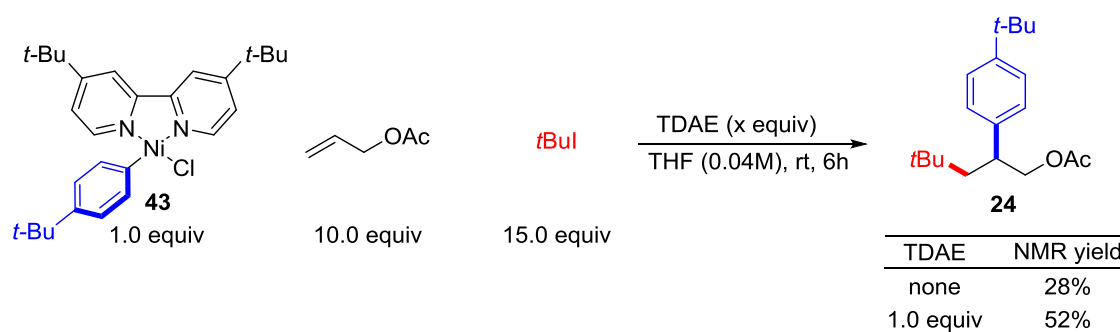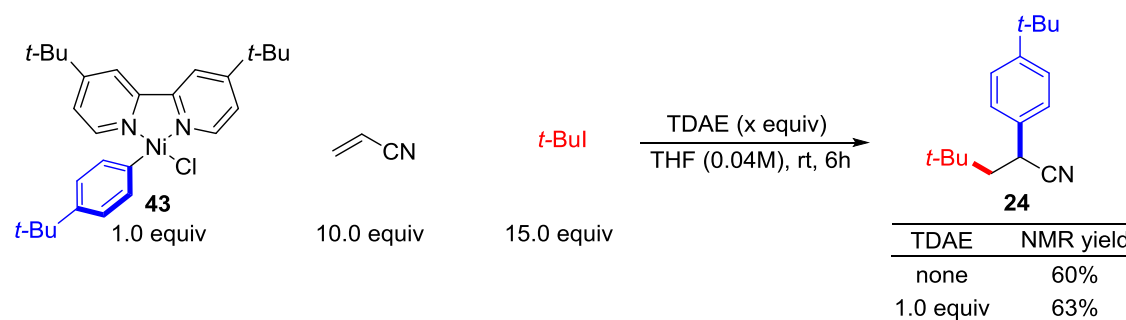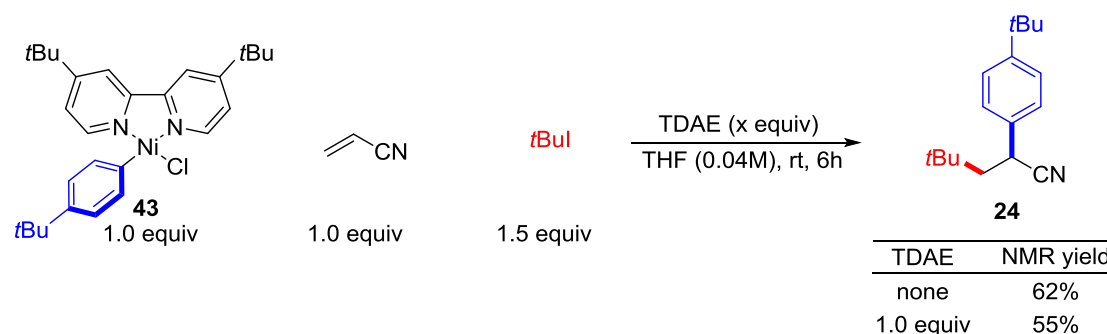

**Experimental procedure:** In a nitrogen filled glove box, a 5 mL vial containing a PTFE-coated stir bar was charged with the arylnickel complex **43** (24.8 mg, 0.05 mmol, 1.0 equiv) and a solution with the corresponding amount of olefin and *tert*-butyl iodide in THF (1.25 mL). TDAE (if needed, 12  $\mu\text{L}$ , 0.05 mmol, 1.0 equiv) was added and the reaction mixture stirred 6h at 25 °C. The vial was taken out of the glovebox and the mixture was diluted with  $\text{Et}_2\text{O}$  (3 mL) and transferred into a separatory funnel containing aqueous HCl 1M (5 mL). The phases were separated and the aqueous

phase extracted with Et<sub>2</sub>O (2 x 5 mL). The combined organic layers were dried over anhydrous MgSO<sub>4</sub> and filtered. After removal of the solvent under reduced pressure *p*-nitroacetophenone (33.0 mg, 0.2 mmol) was added as internal standard, redissolved in CDCl<sub>3</sub> (1.0 mL) and the crude mixture analyzed by <sup>1</sup>H NMR.

**Conclusions:** Aryl-Ni(II) complex **43** prepared independently was able to produce efficiently the desired dicarbofunctionalization products either in presence or absence of the organic reductant. These results suggest that aryl-Ni(II) complexes might be potential intermediates along the reaction pathway.

## 5.4 TDAE as reductant

### 5.4.1 Comparison between common reductants

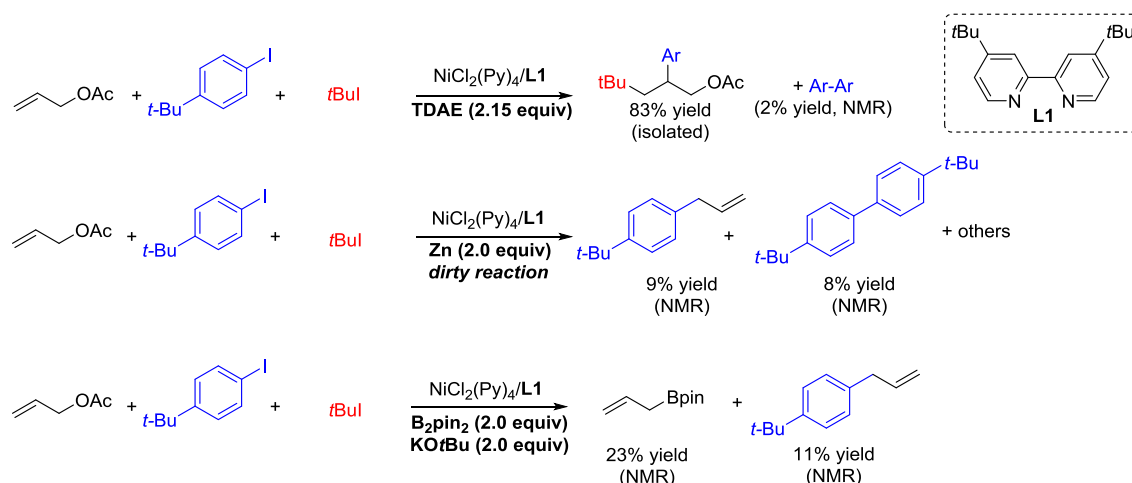

**Experimental procedure for the reactions using Zn and B<sub>2</sub>pin<sub>2</sub>/KOtBu as reductant:** NiCl<sub>2</sub>(Py)<sub>4</sub> (8.9 mg, 0.02 mmol, 10 mol%), **L1** (5.4 mg, 0.02 mmol, 10 mol%) and reductant (0.4 mmol, 2.0 equiv) were placed in an oven dried Schlenk flask. The reaction vessel was evacuated and filled back with nitrogen three times. THF (0.5 mL), allyl acetate (20.0 mg, 0.2 mmol, 1.0 equiv), 4-*tert*-butyliodobenzene (104.4 mg, 0.4 mmol, 2.0 equiv) and *tert*-butyl iodide (55.2 mg, 0.3 mmol, 1.5 equiv) were sequentially added and stirred (1400 rpm) 15 h at 25 °C under N<sub>2</sub>. The mixture was diluted with Et<sub>2</sub>O (5 mL) and transferred into a separatory funnel containing aqueous HCl 1M (5 mL). The phases were separated and the aqueous phase extracted with Et<sub>2</sub>O twice. The combined organic layers were dried over anhydrous MgSO<sub>4</sub> and filter. After removal of the solvent under reduced pressure *p*-nitroacetophenone (33.0 mg, 0.2 mmol) was added as internal standard, redissolved in CDCl<sub>3</sub> (1.0 mL) and the crude mixture analyzed by <sup>1</sup>H NMR.

#### 5.4.2 Transformation of TDAE into [TDAE](I)<sub>2</sub>

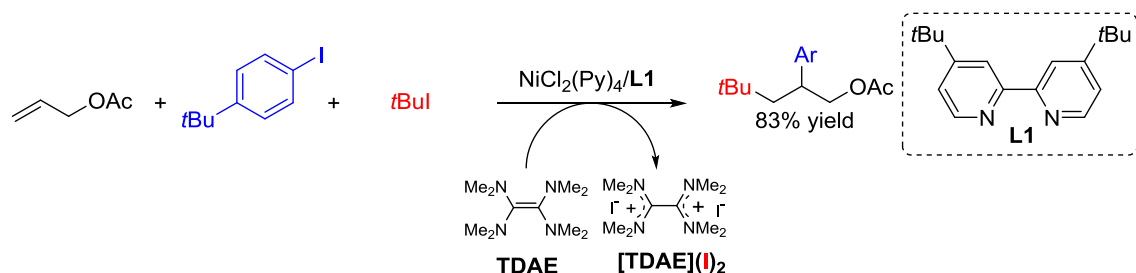

**Experimental procedure for the isolation of [TDAE](I)<sub>2</sub>:** NiCl<sub>2</sub>(Py)<sub>4</sub> (8.9 mg, 0.02 mmol, 10 mol%), **L1** (5.4 mg, 0.02 mmol, 10 mol%) were placed in an oven dried Schlenk flask. The reaction vessel was evacuated and filled back with nitrogen three times. THF (0.5 mL), allyl acetate (20.0 mg, 0.2 mmol, 1.0 equiv), 4-*tert*-butyliodobenzene (104.4 mg, 0.4 mmol, 2.0 equiv) and *tert*-butyl iodide (55.2 mg, 0.3 mmol, 1.5 equiv) were sequentially added and stirred (1400 rpm) one minute at 25 °C under N<sub>2</sub>. TDAE (0.1 mL, 0.43 mmol, 2.15 equiv) was added dropwise and the reaction stirred for additional 15 h at 25 °C under N<sub>2</sub>. The mixture was filter with a frit and the solid washed with Et<sub>2</sub>O (10 mL) and dry under vacuum to give [TDAE](I)<sub>2</sub> as a light yellow powder. <sup>1</sup>H NMR (400 MHz, D<sub>2</sub>O) δ 3.64 (s, 12H), 3.36 (s, 12H); <sup>13</sup>C NMR (101 MHz, D<sub>2</sub>O) δ 155.87, 43.29, 42.36; IR (film): ν (C=N) 1666, 1652 cm<sup>-1</sup>; HR-MS (ESI, positive mode) m/z calcd for C<sub>10</sub>H<sub>24</sub>N<sub>4</sub> [TDAE<sup>+</sup>]: 200.19955, found 200.19959; HR-MS (ESI, negative mode) m/z calcd for [I]<sup>-</sup>: 126.90502, found 126.90507.

**Conclusions:** [TDAE](I)<sub>2</sub> is formed in the reaction according to both, spectroscopy and HR-MS data analysis.<sup>14</sup>

### 5.4.3 Effect of Zn<sup>2+</sup> in the reaction outcome

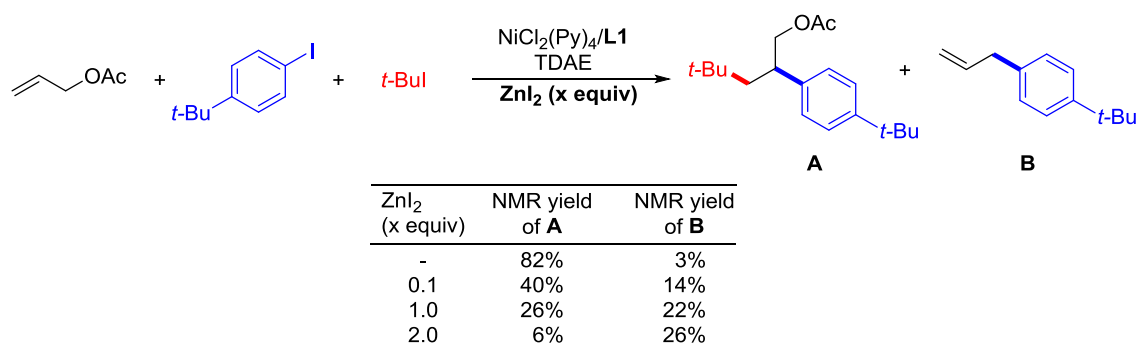

**Experimental procedure:** NiCl<sub>2</sub>(Py)<sub>4</sub> (8.9 mg, 0.02 mmol, 10 mol%), **L1** (5.4 mg, 0.02 mmol, 10 mol%) and ZnI<sub>2</sub> were placed in an oven dried Schlenk-tube. The reaction vessel was evacuated and filled with nitrogen three times. THF (0.5 mL), 4-*tert*-butyliodobenzene (104.0 mg, 0.4 mmol, 2.0 equiv) and *tert*-butyl iodide (55.2 mg, 0.3 mmol, 1.5 equiv) were sequentially added and stirred (1400 rpm) one minute at 25 °C. TDAE (0.1 mL, 0.43 mmol, 2.15 equiv) was added dropwise and the reaction stirred for additional 15 h at 25 °C under N<sub>2</sub>. The resulting mixture was diluted with Et<sub>2</sub>O (5 mL) and transferred into a separatory funnel containing aqueous HCl 1M (5 mL). The phases were separated and the aqueous phase extracted with Et<sub>2</sub>O (2 x 5 mL). The combined organic layers were dried over anhydrous MgSO<sub>4</sub> and filtered. After removal of the solvent under reduced pressure *p*-nitroacetophenone (33.0 mg, 0.2 mmol) was added as internal standard, redissolved in CDCl<sub>3</sub> (1.0 mL) and the crude mixture analyzed by <sup>1</sup>H NMR.

**Conclusions:** The decreased yield of the desired product in presence of Zn<sup>2+</sup>, suggest that *this Lewis acid might compete with nickel for the coordinating/directing group of the olefinic partner, which is needed for a succesful transformation.*



## 6. Additional Results

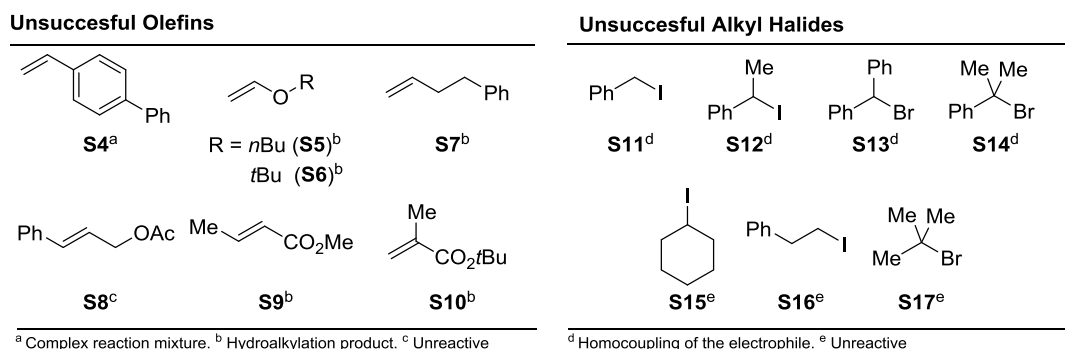

### Results with Aryl Bromides:

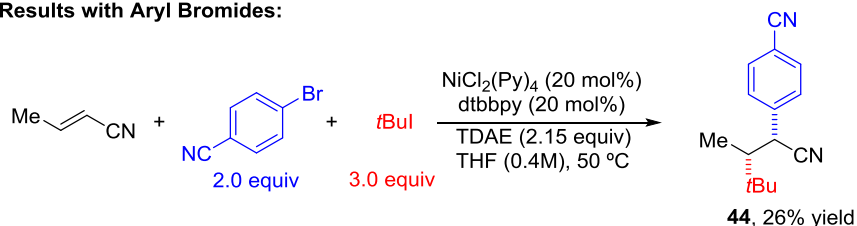

## 7. Alternative Mechanistic Proposal

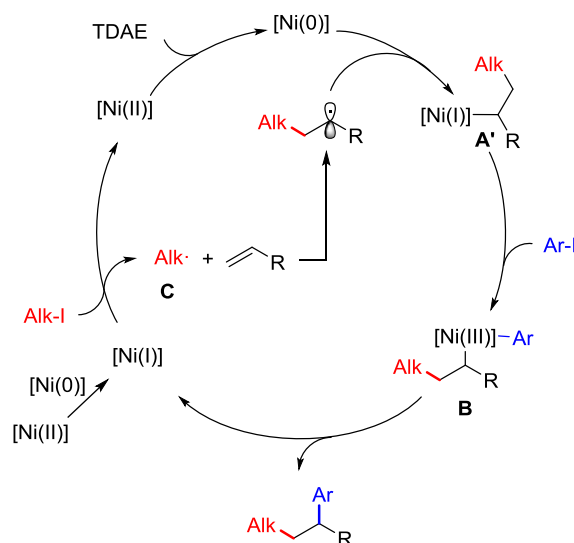

Under the reductive reaction conditions, Ni(I) species generated *in situ* induce the formation of alkyl radicals **C** delivering Ni(II) species which are further reduced to Ni(0) by the organic reductant. The alkyl radicals generated add onto the terminal carbon of the olefin leading to secondary C-centered radicals which recombine with the Ni(0) species generated previously giving an alkyl-Ni(I) intermediate (**A'**). Oxidative addition of the aryl iodide give rise to the formation of Ni(III) complexes **B** that close the catalytic cycle delivering the desired product upon reductive elimination.

## 8. NMR Spectra of New Substrates

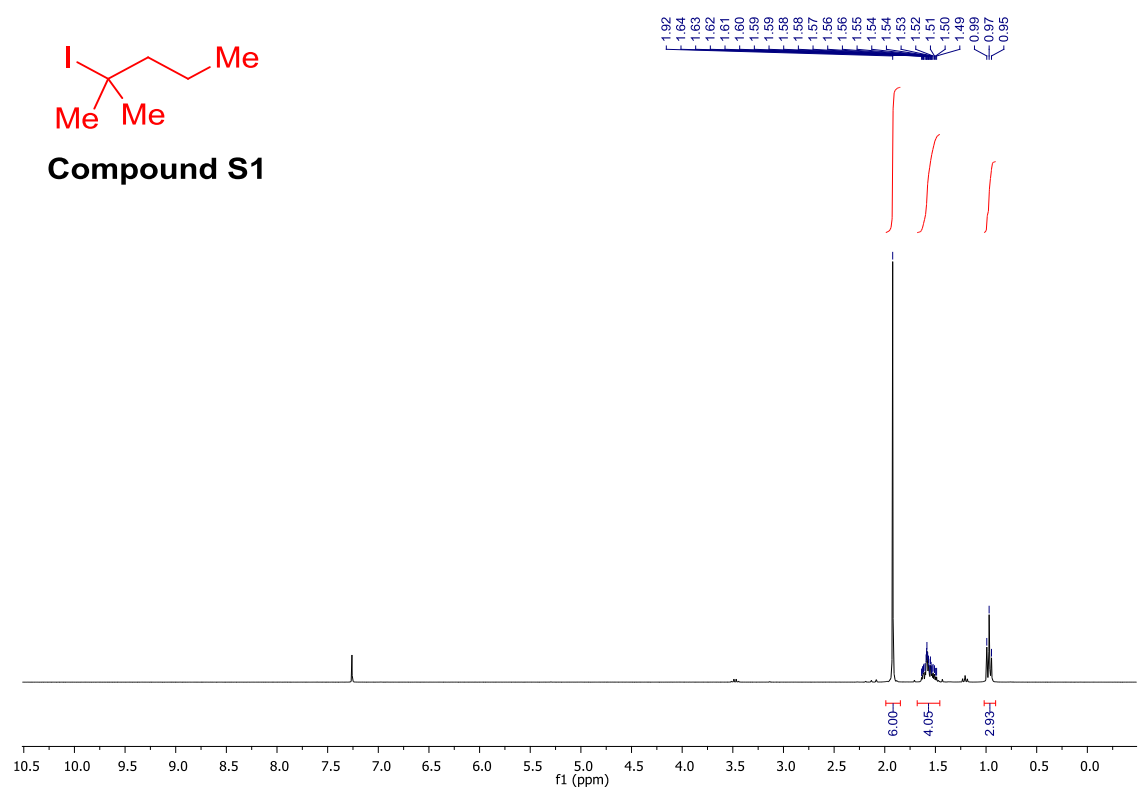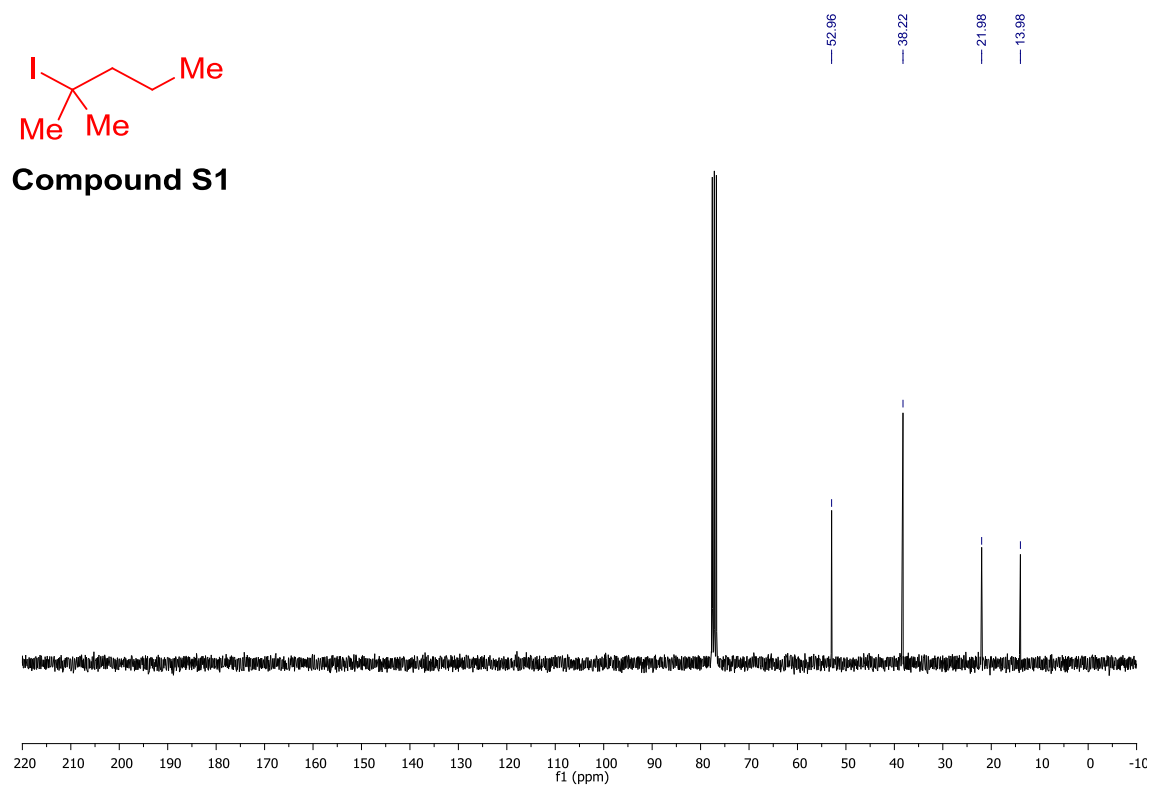

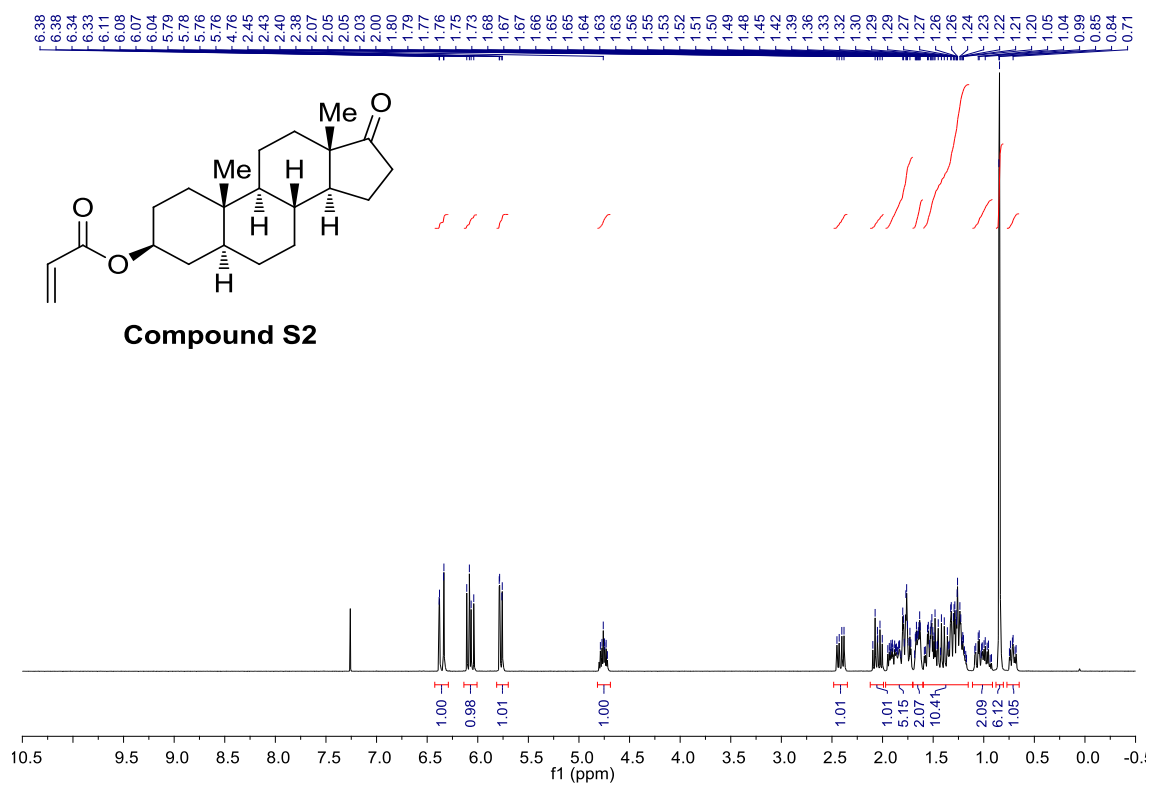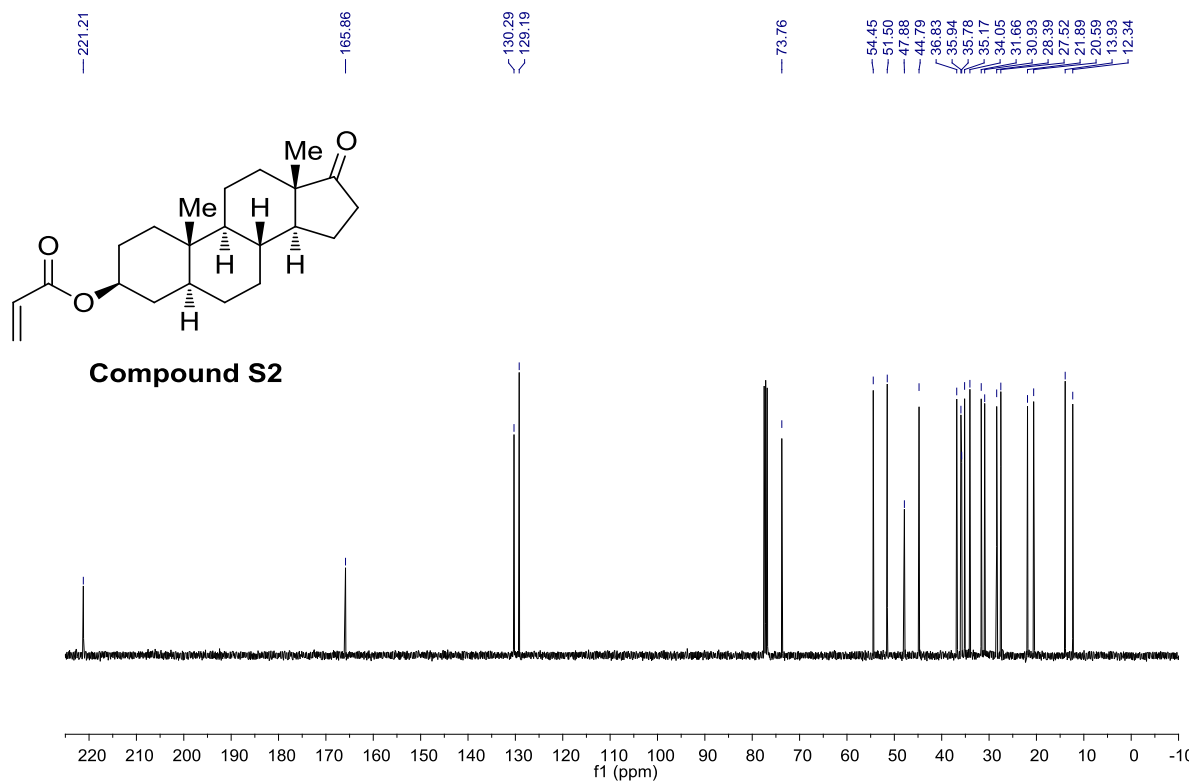

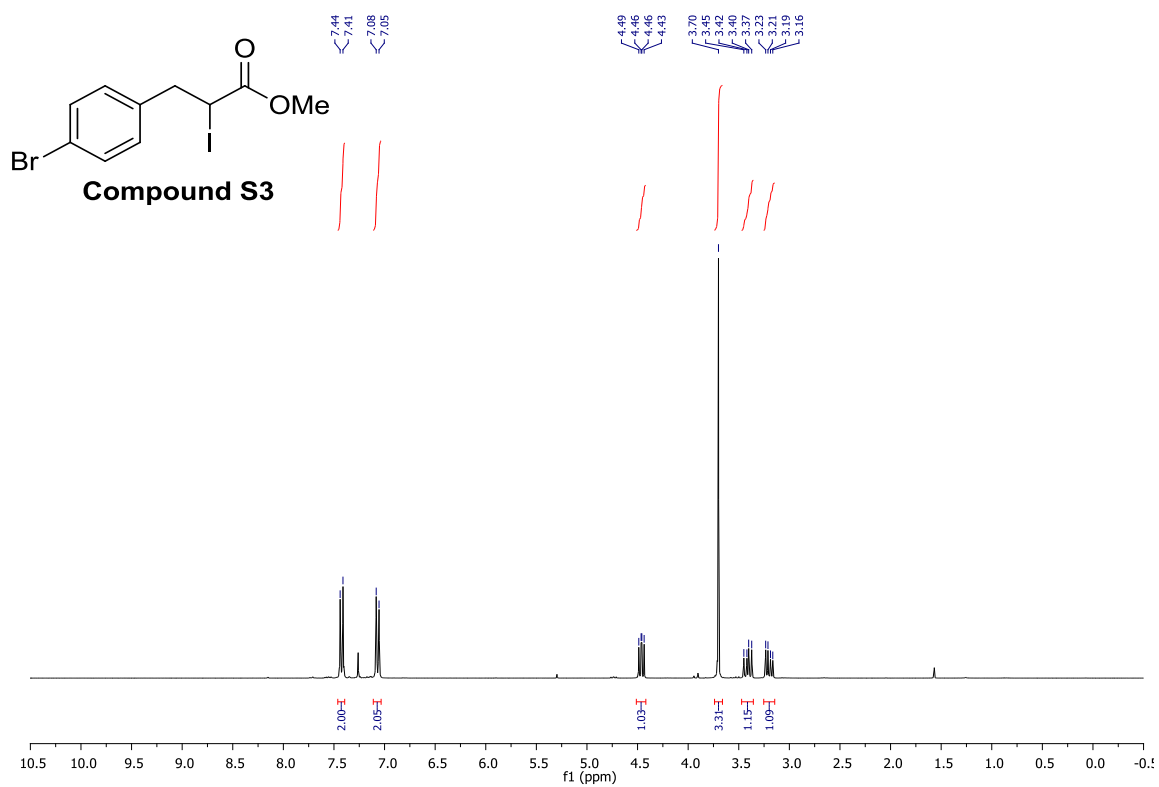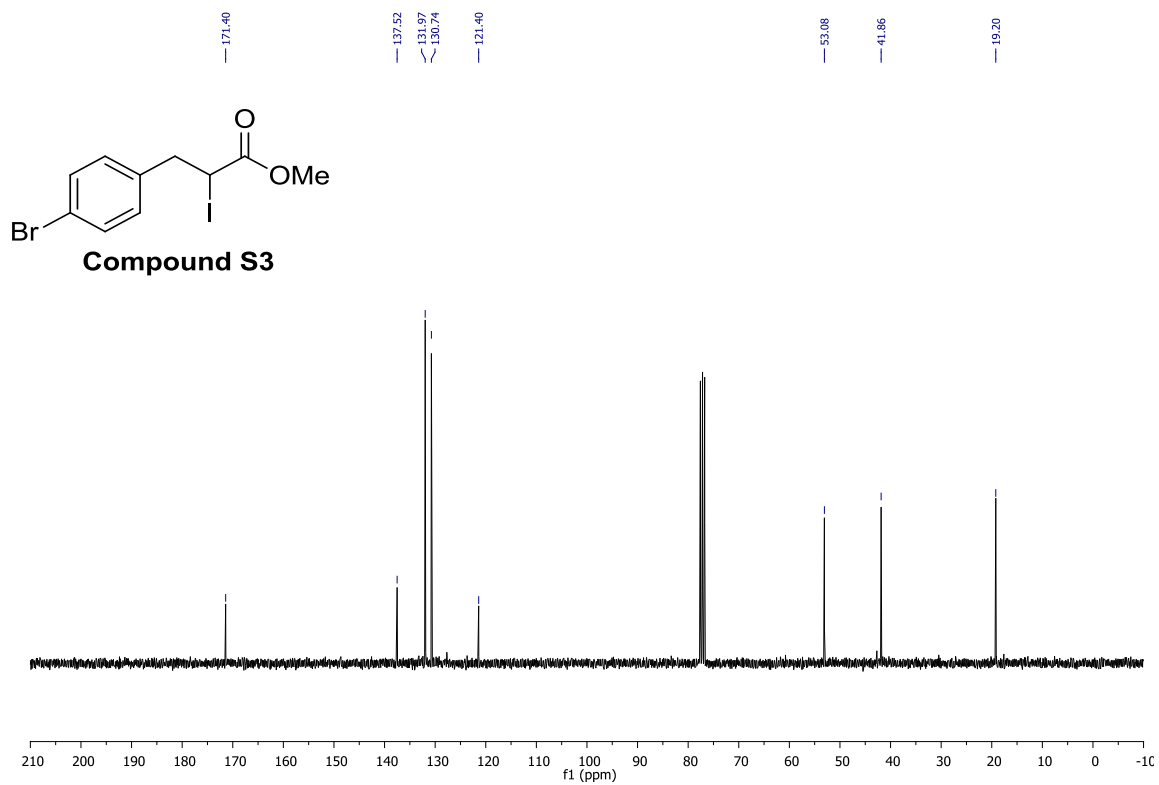

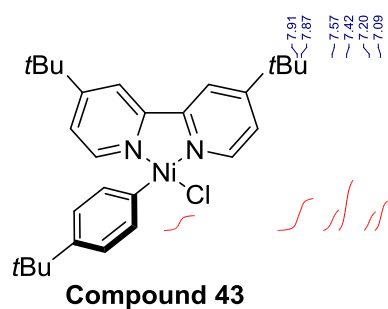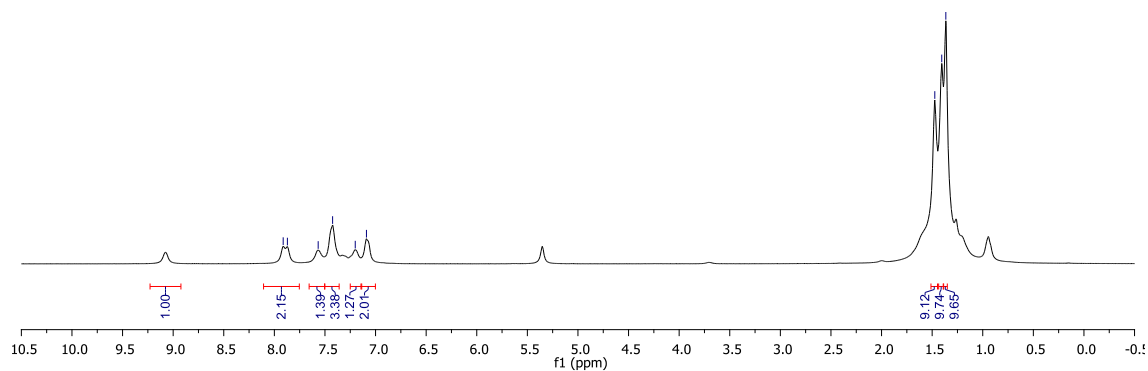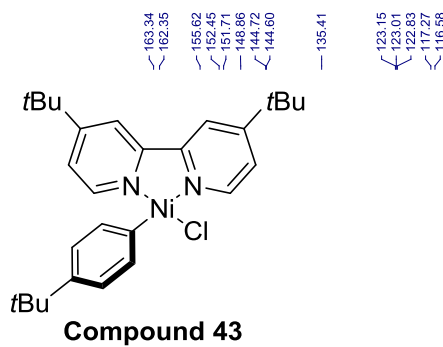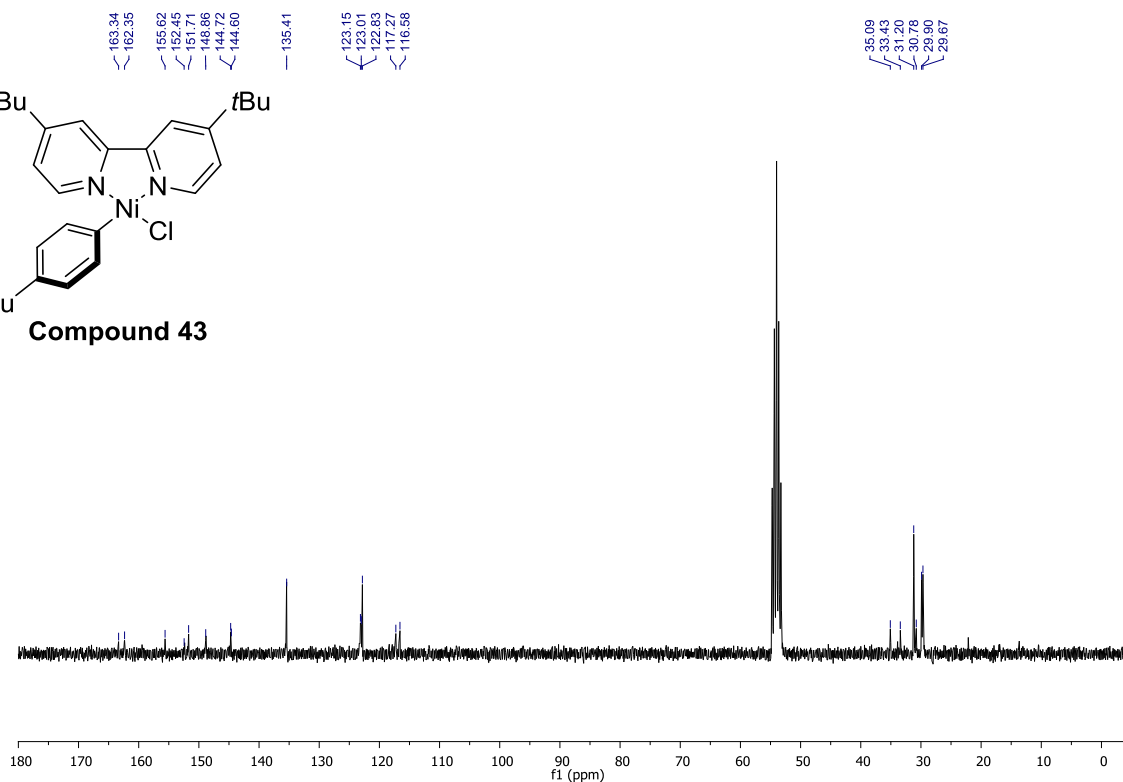

## 9. NMR Spectra of New Products

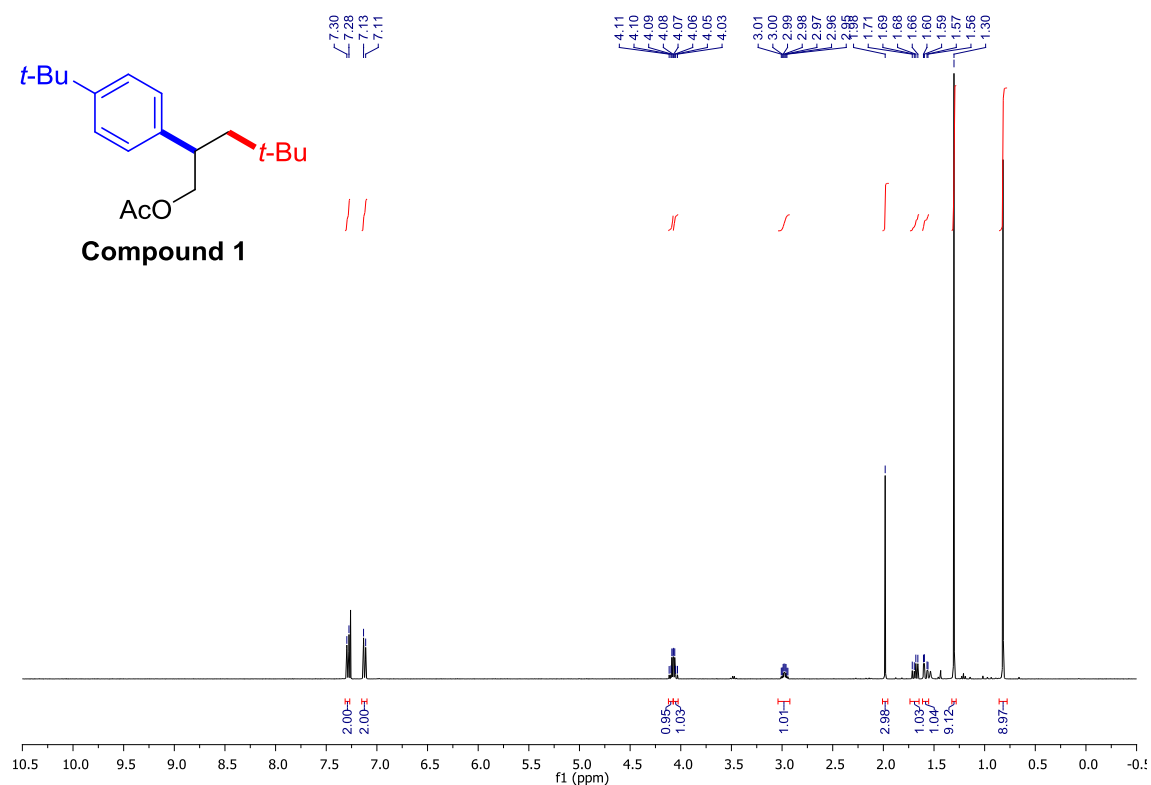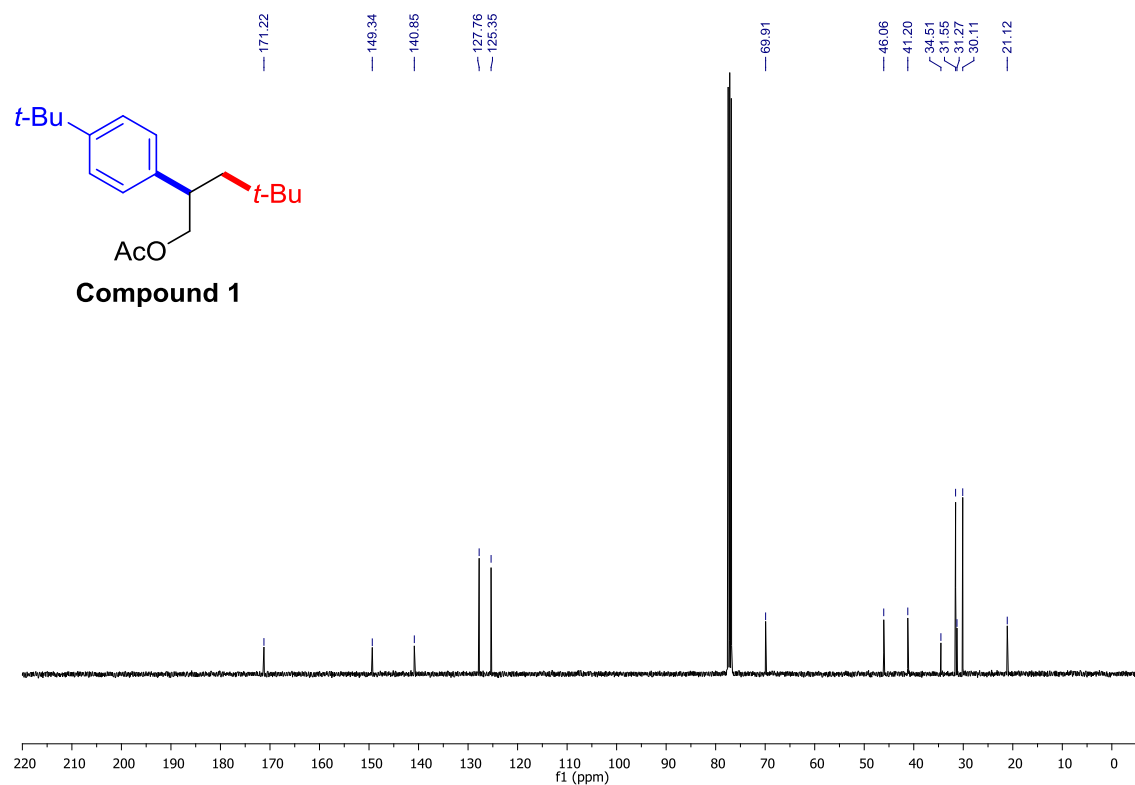

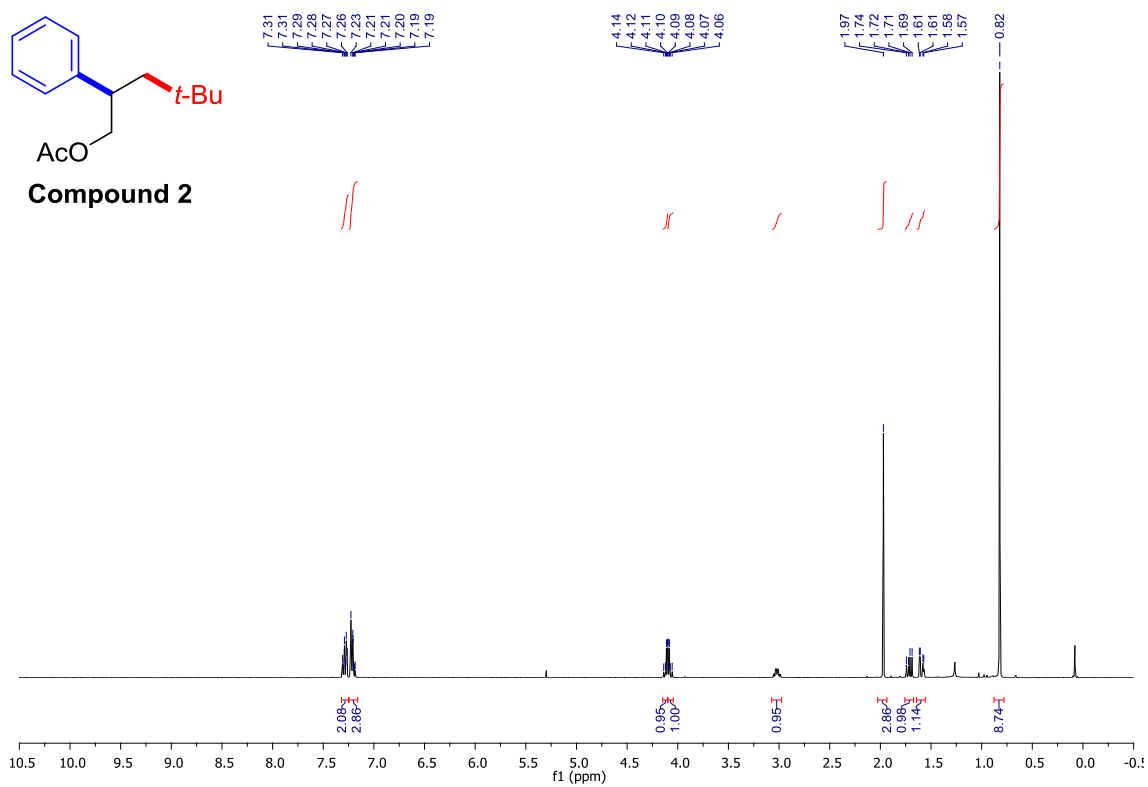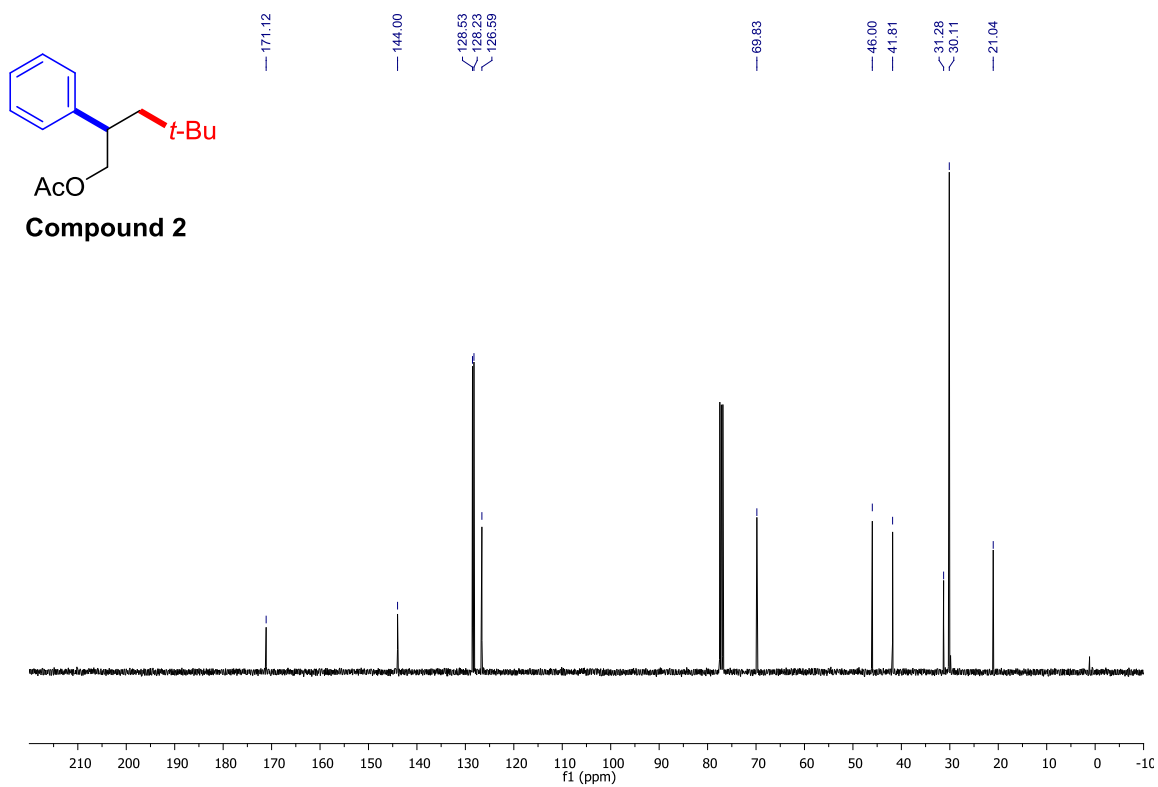

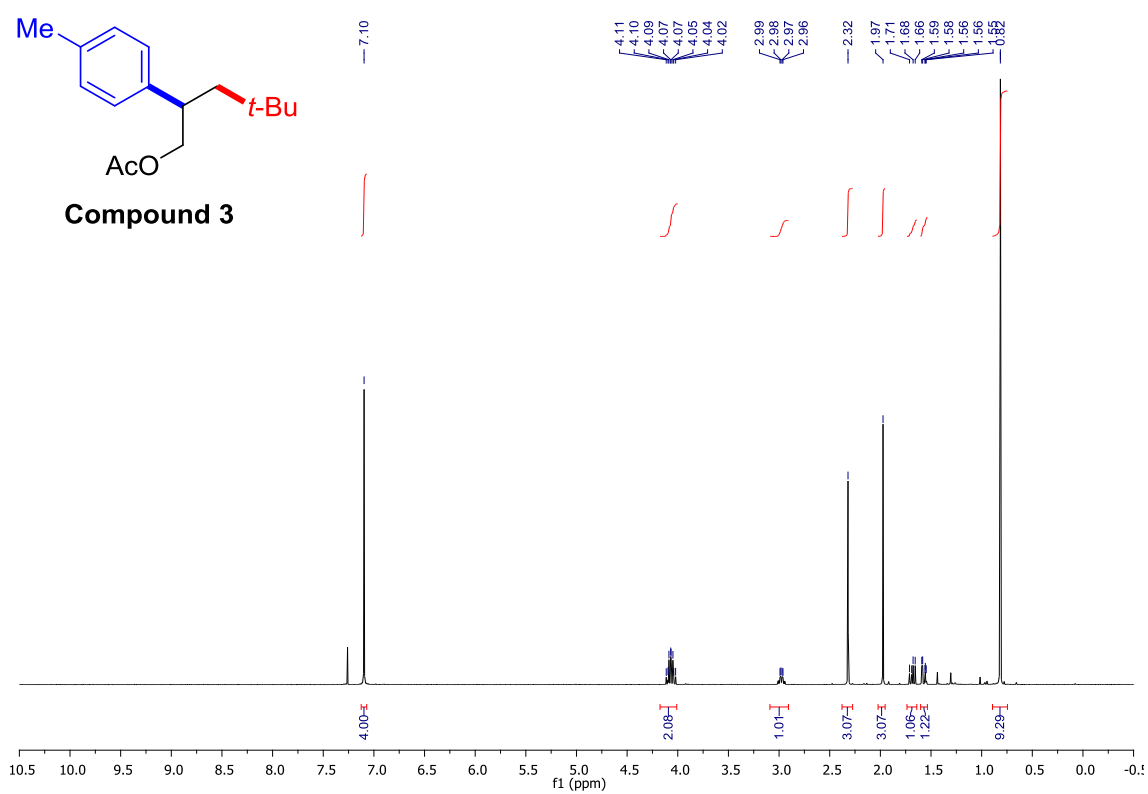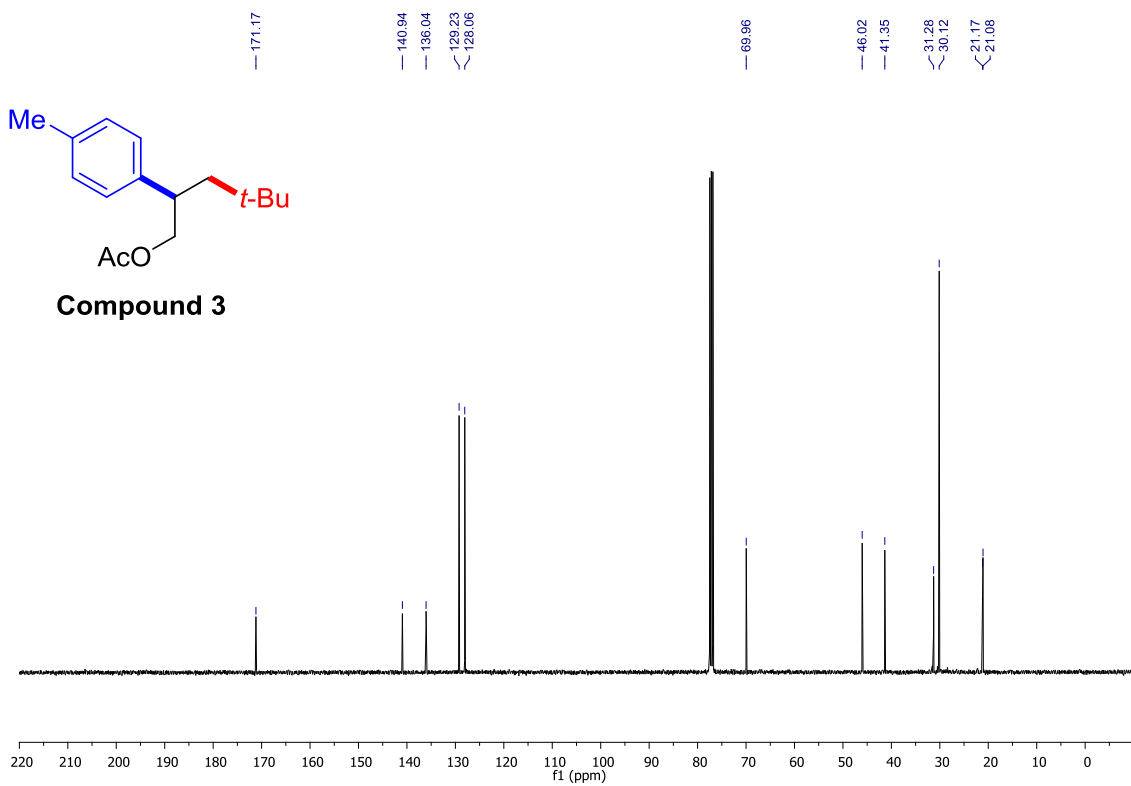



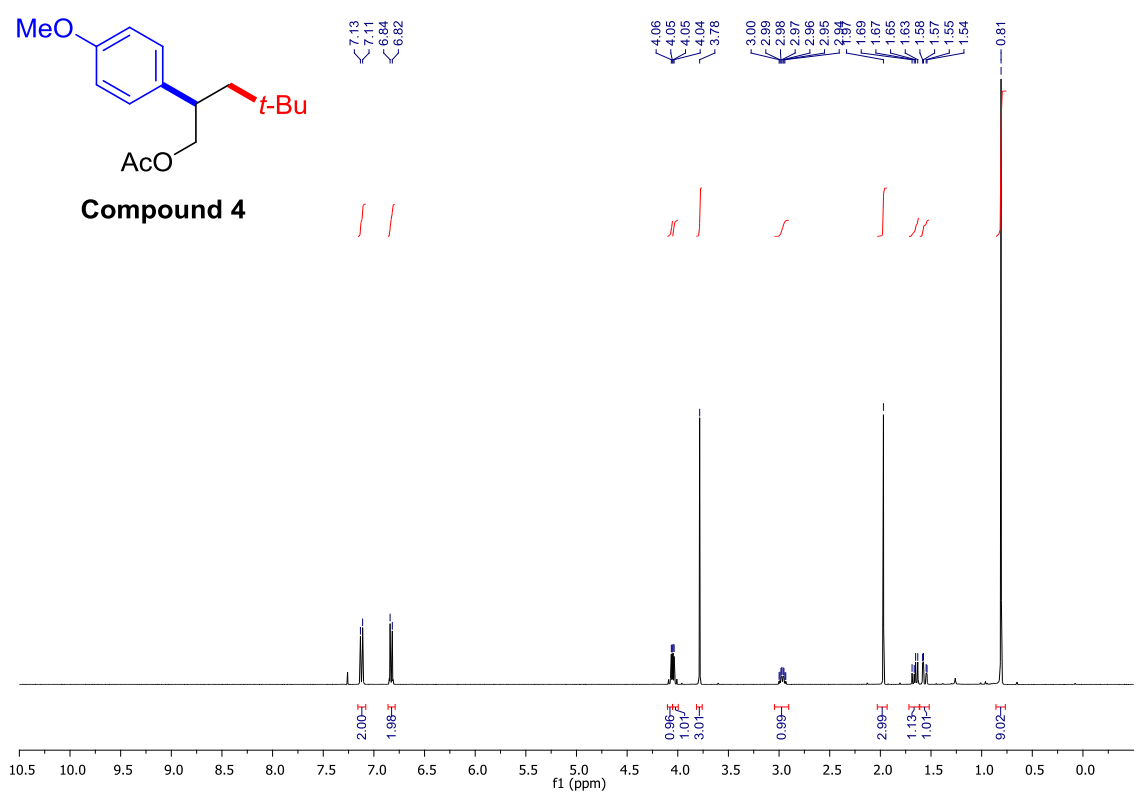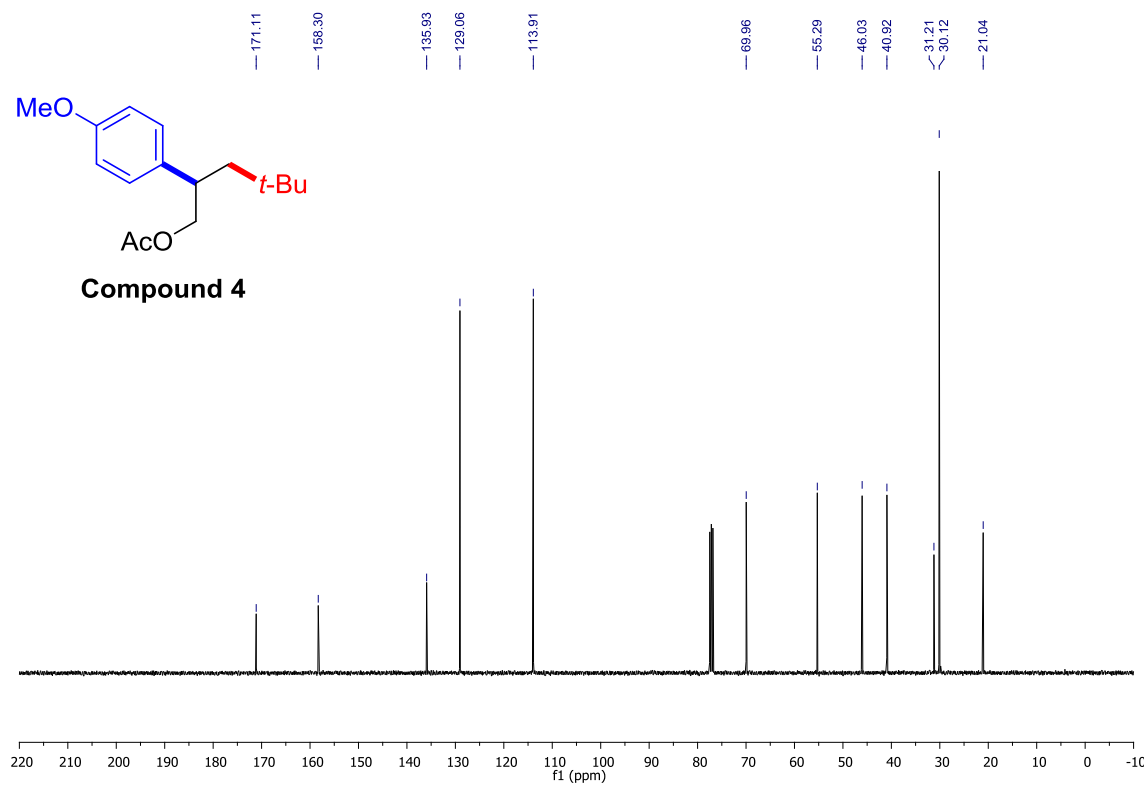

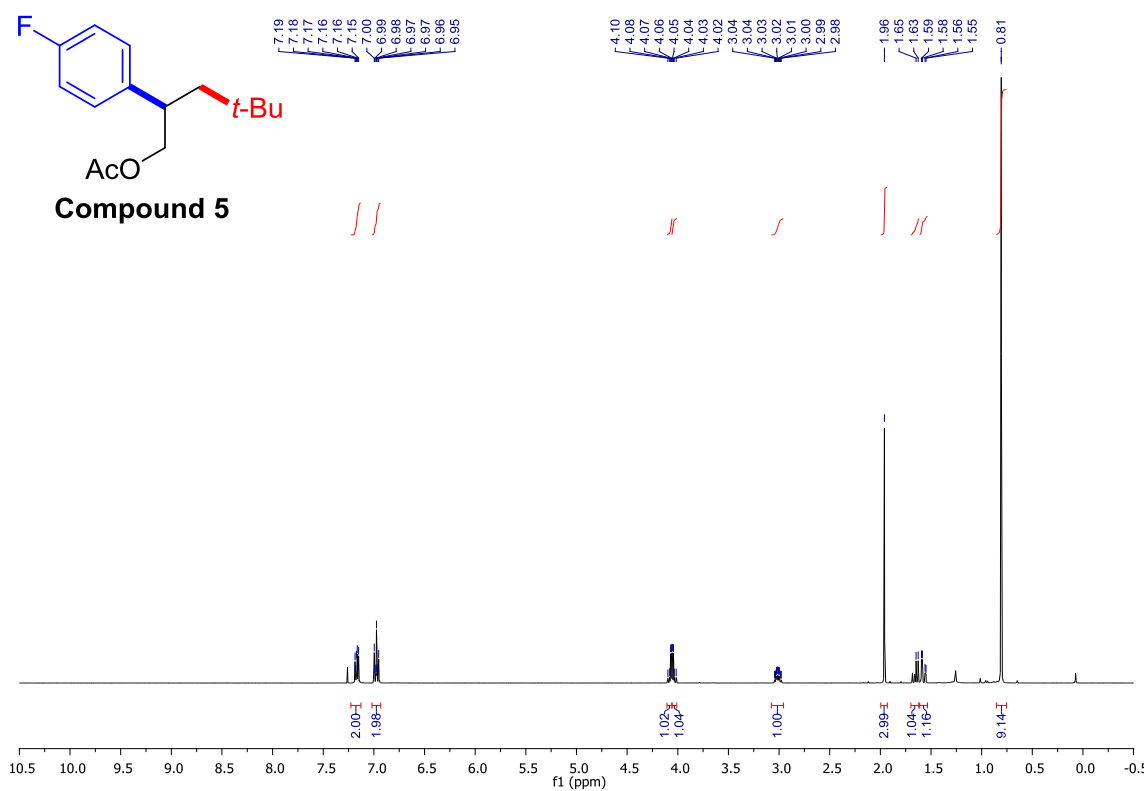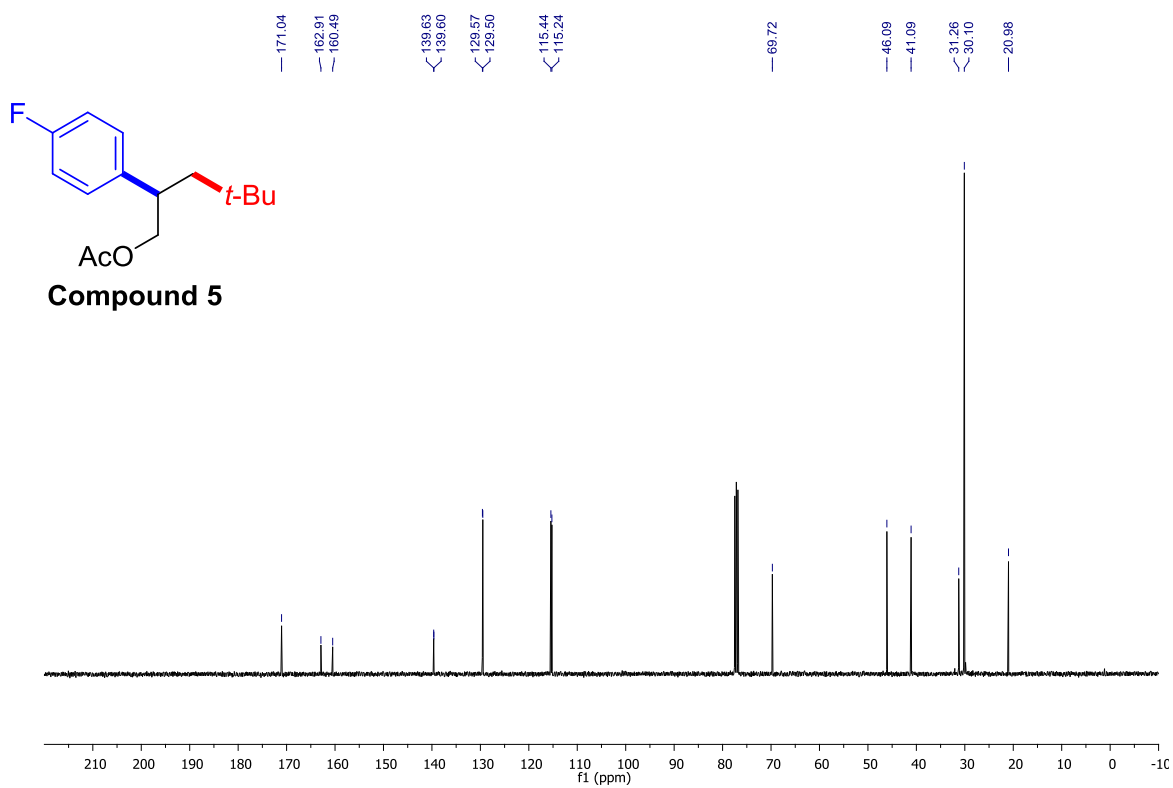

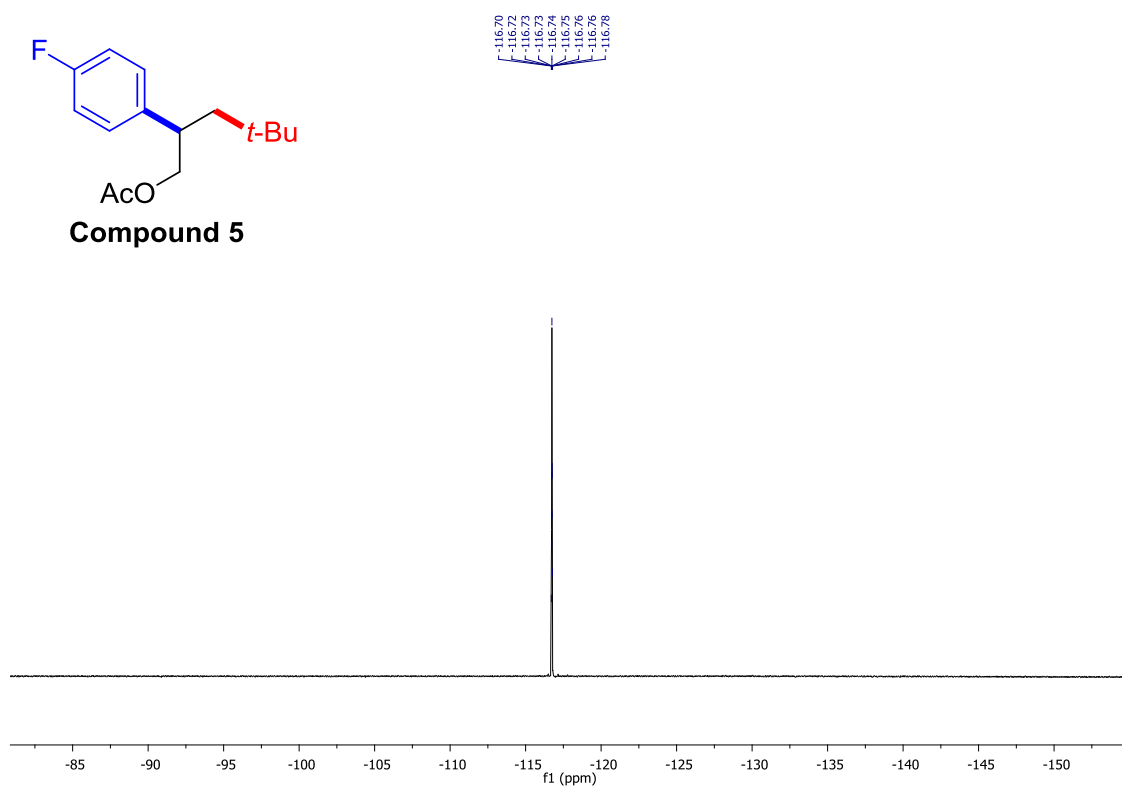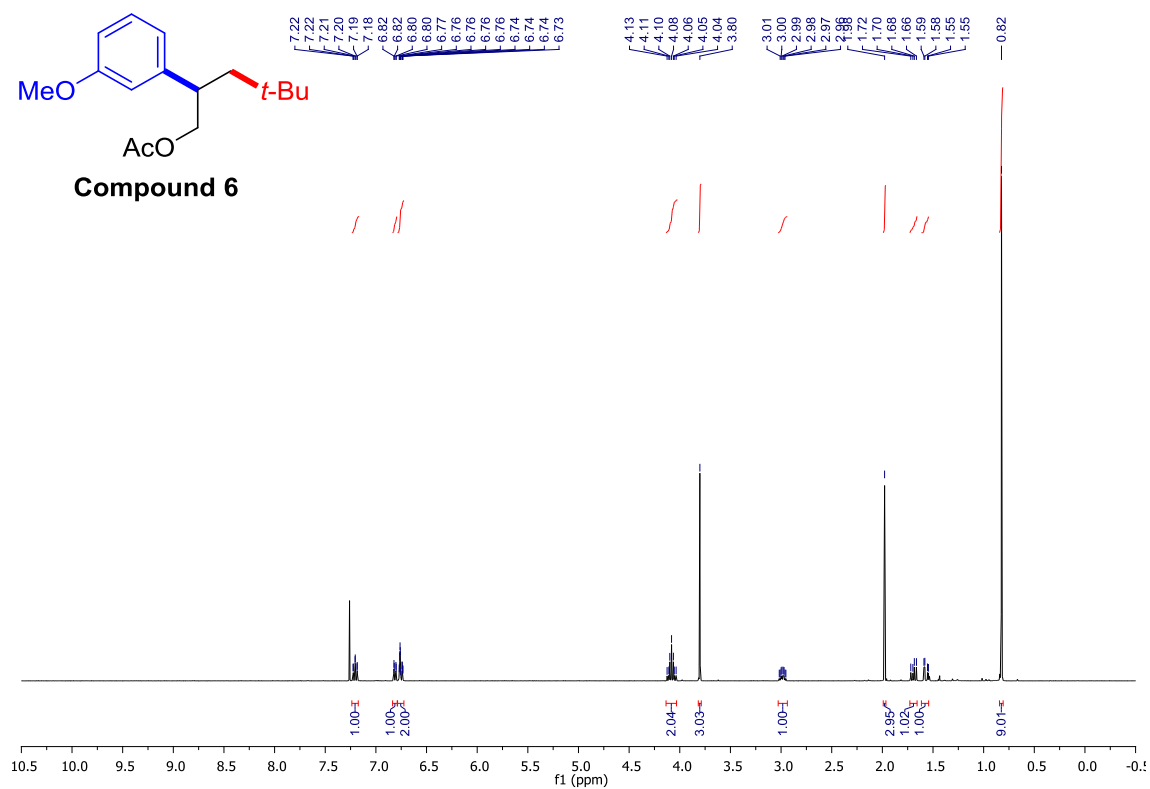

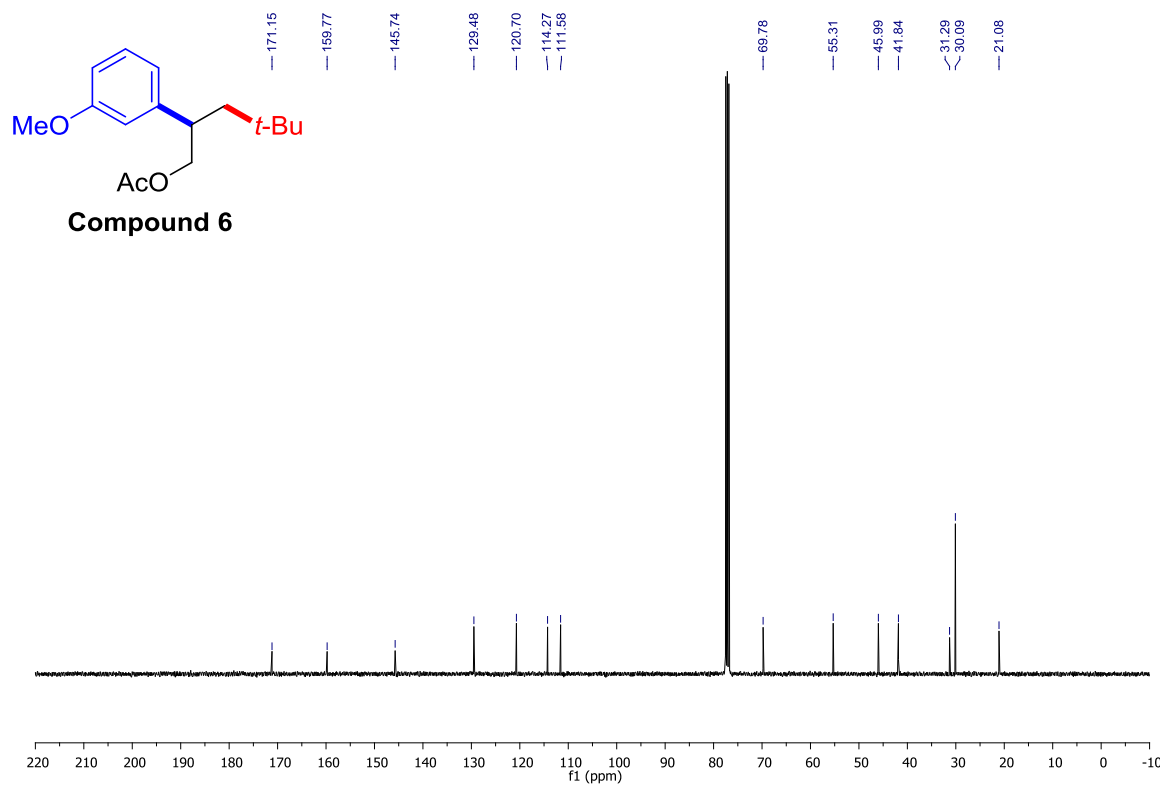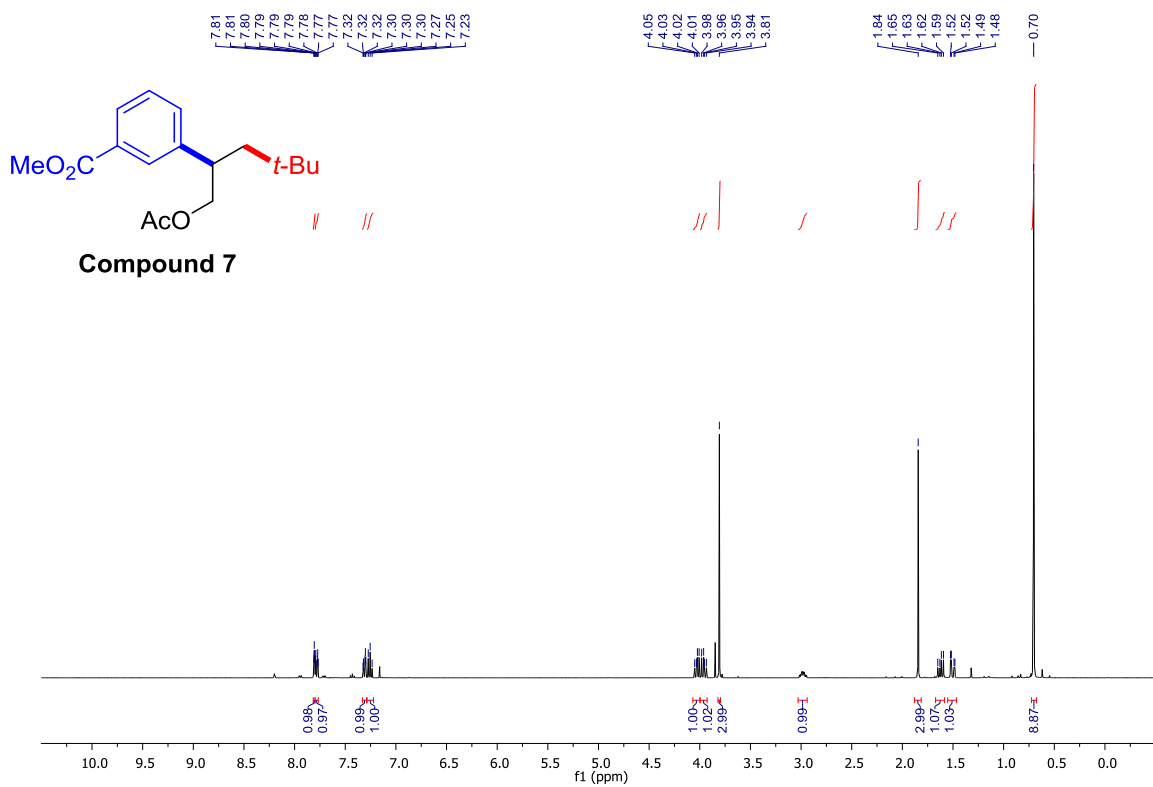

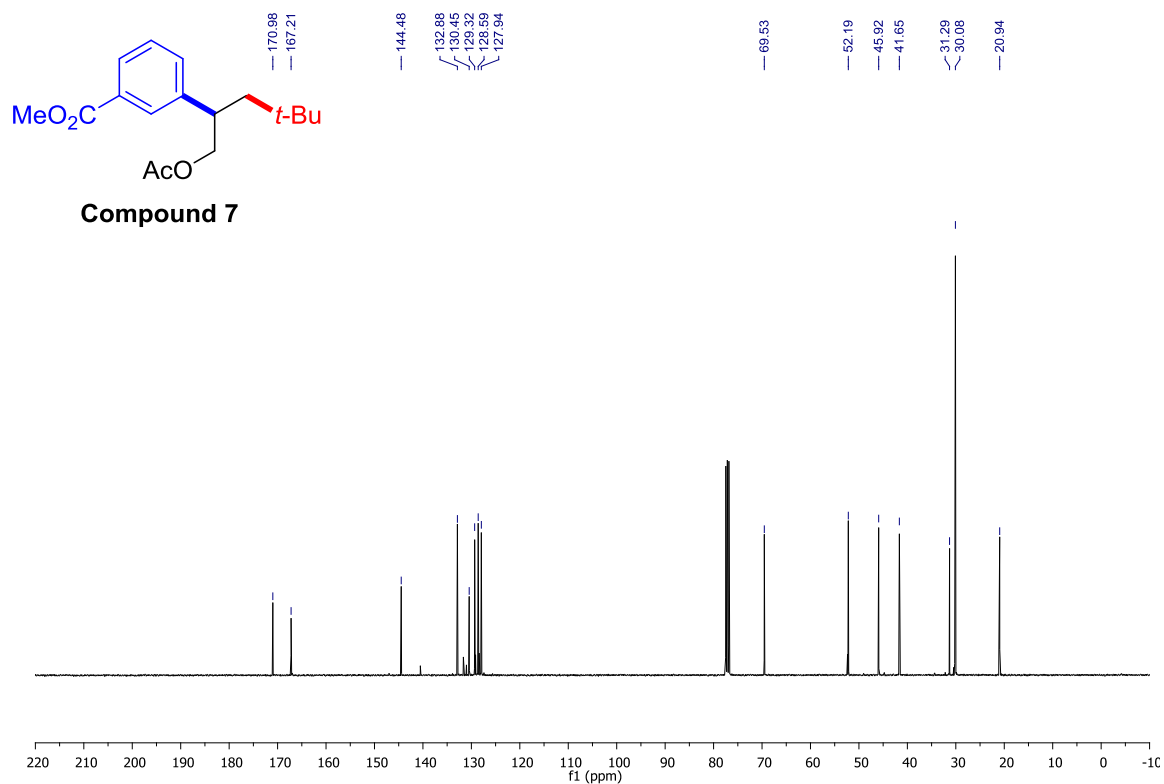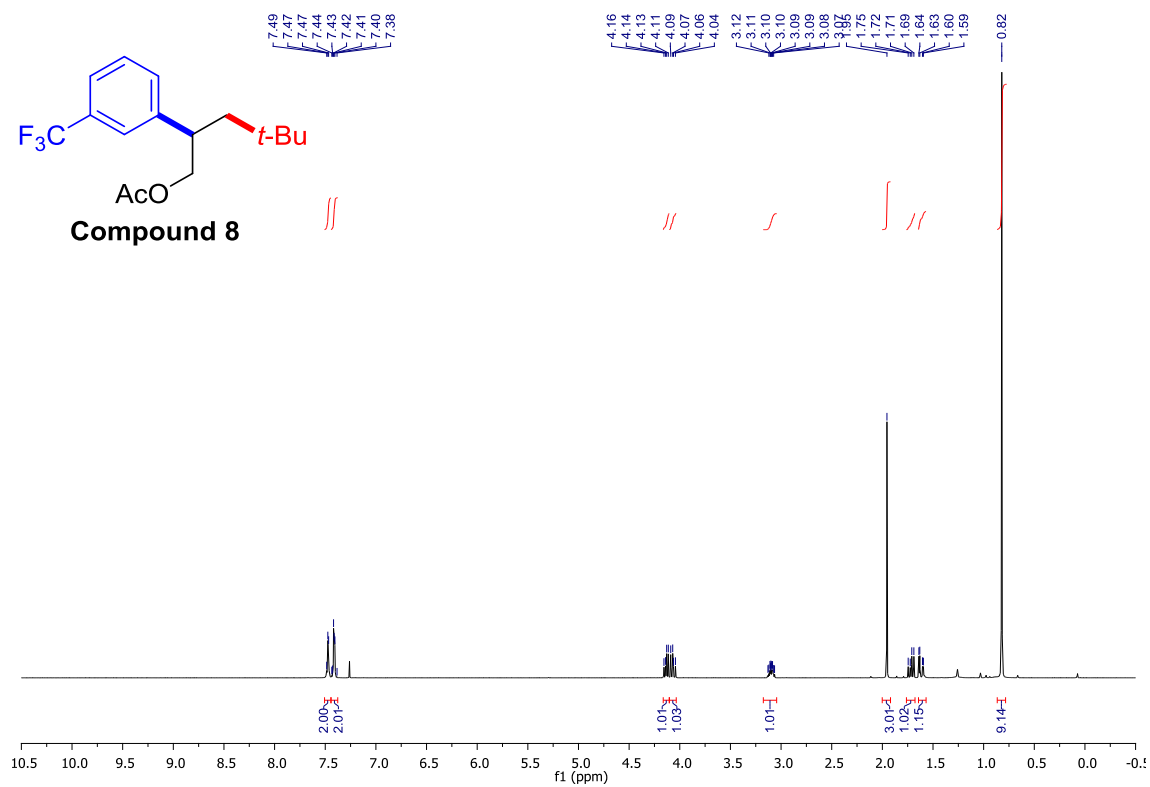

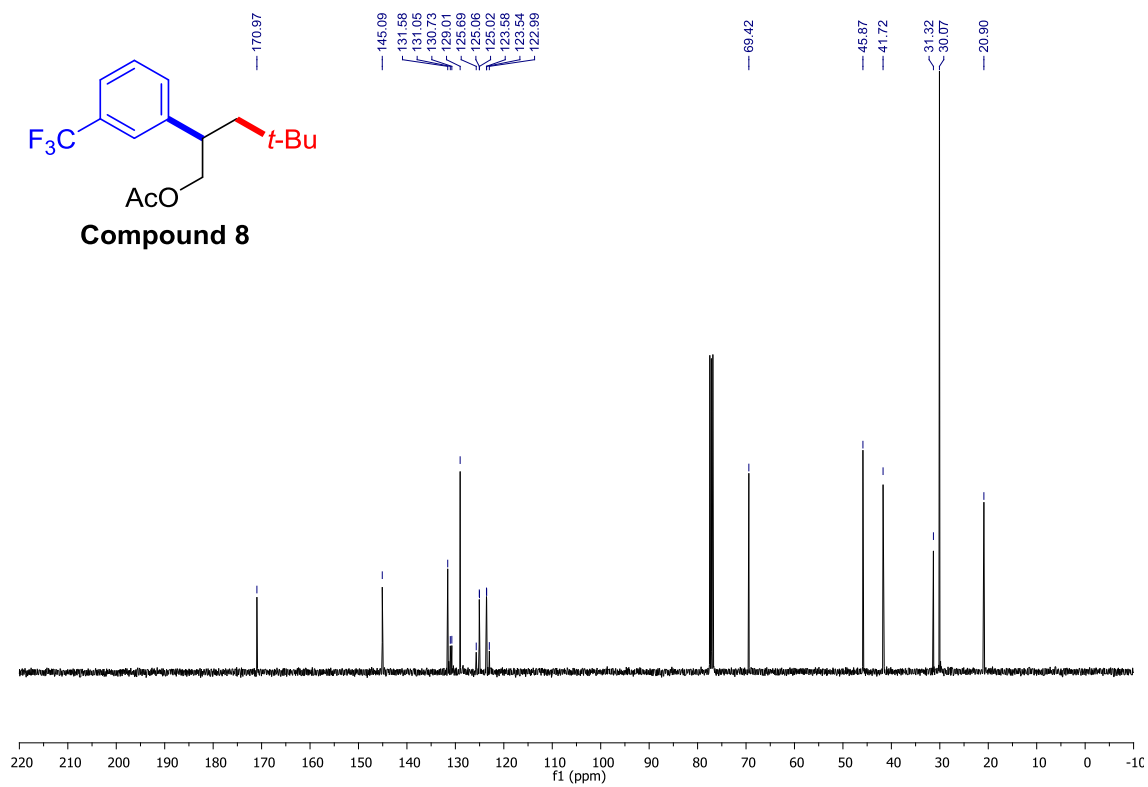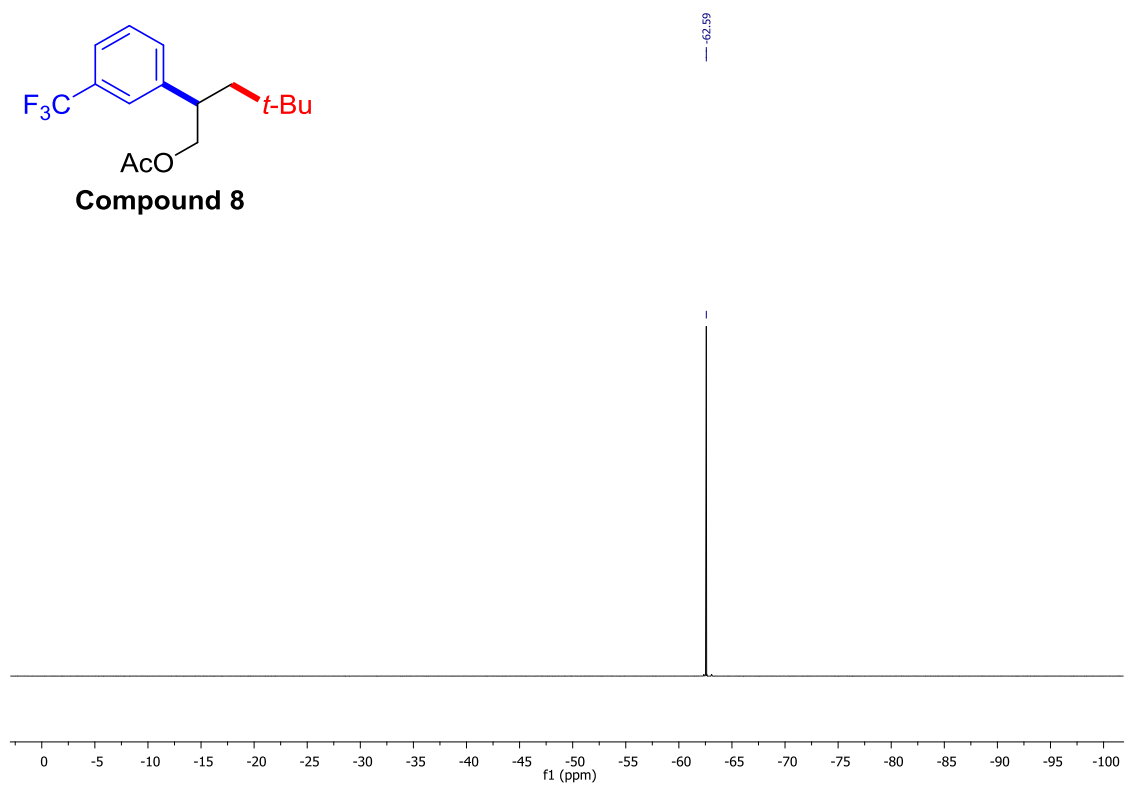

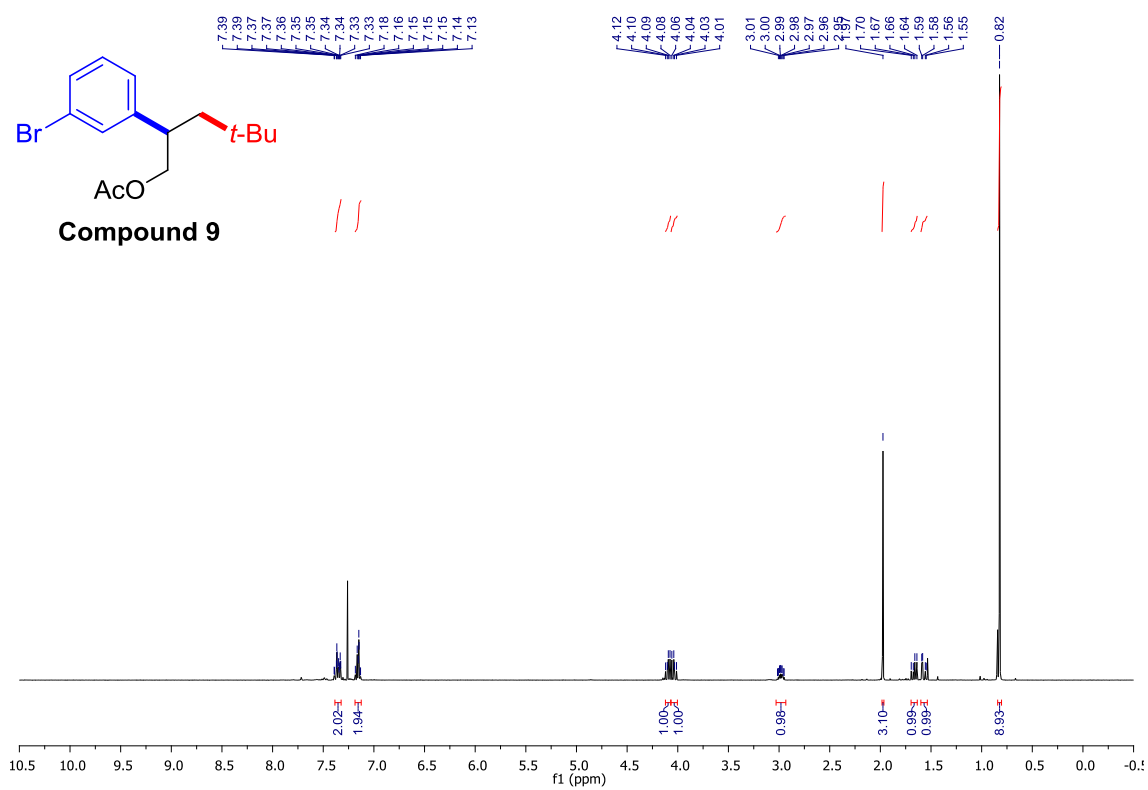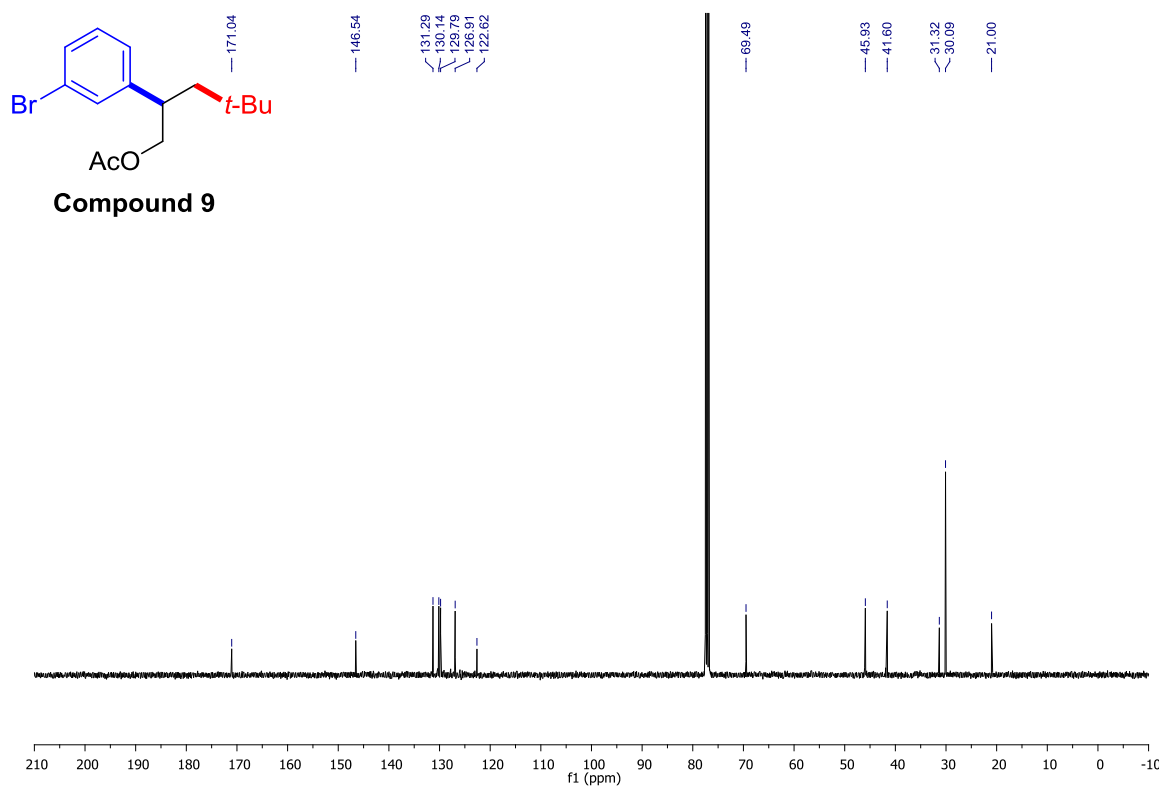

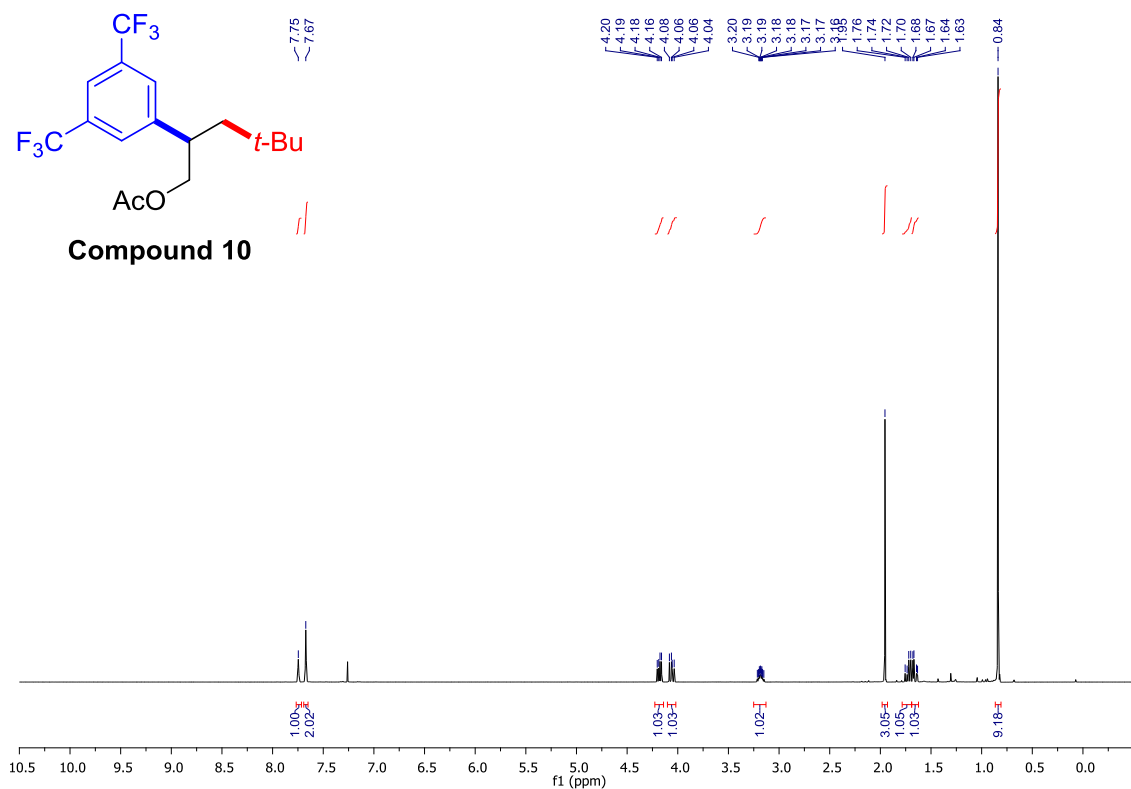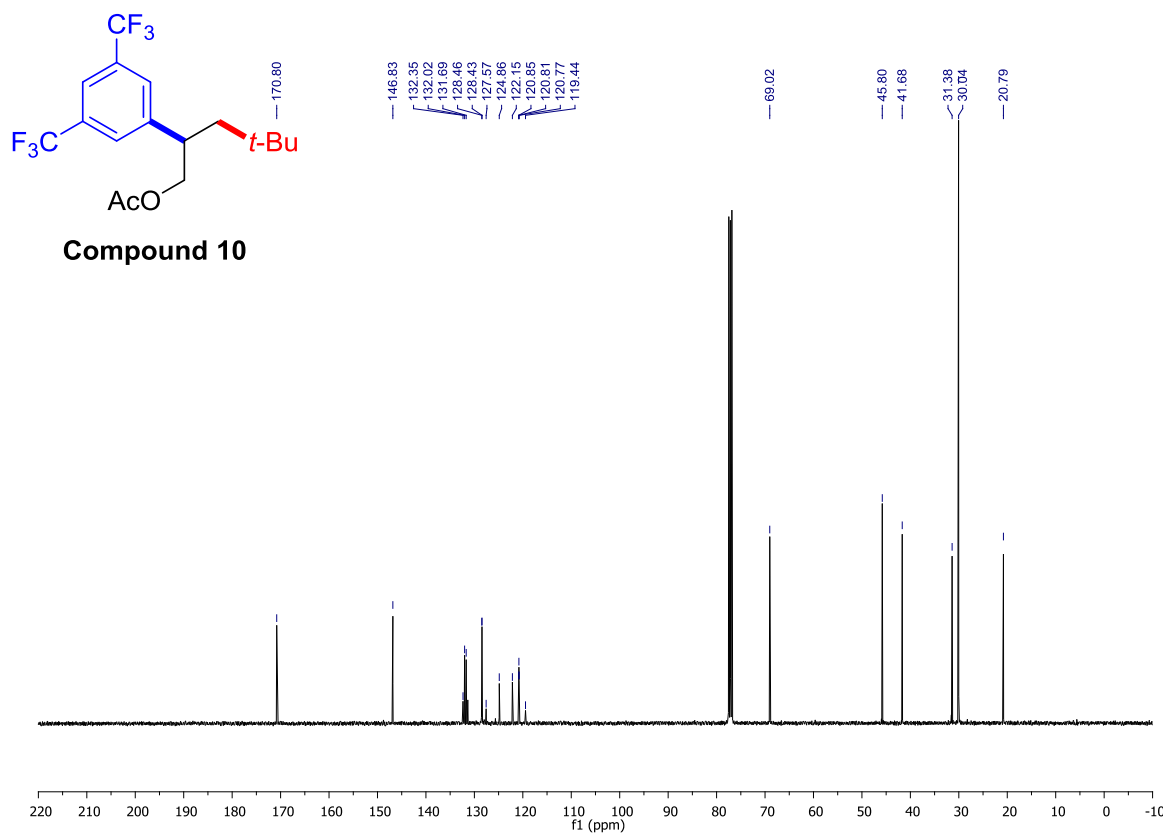



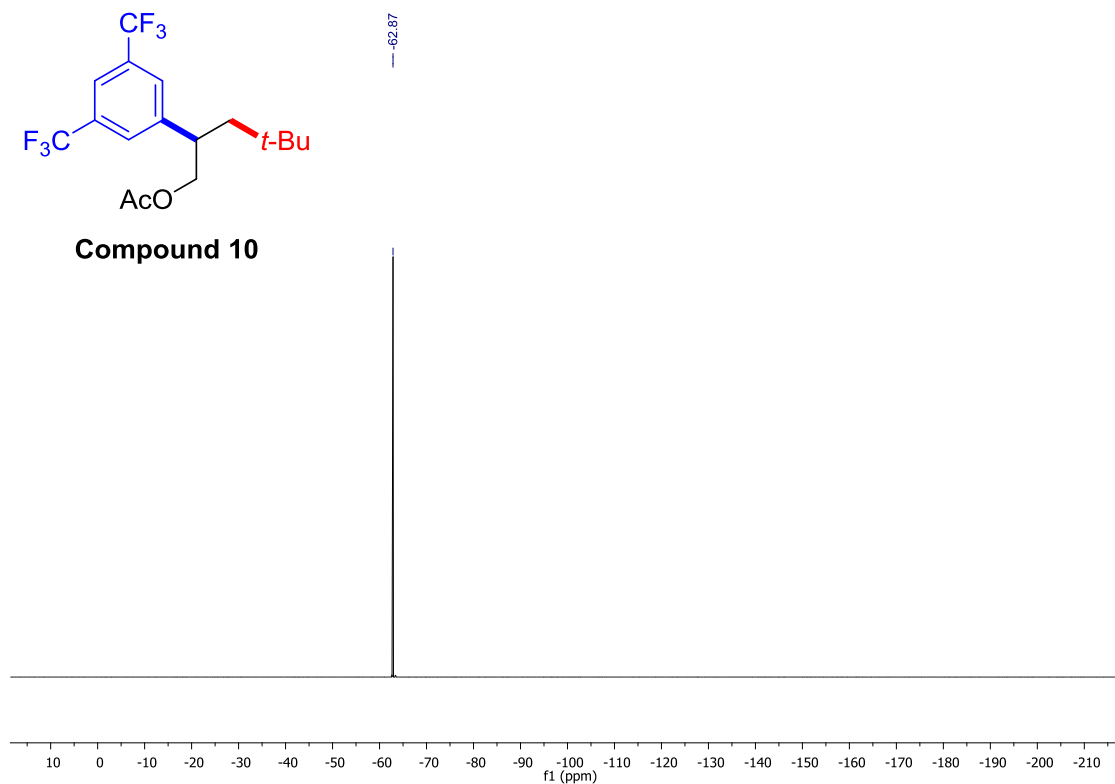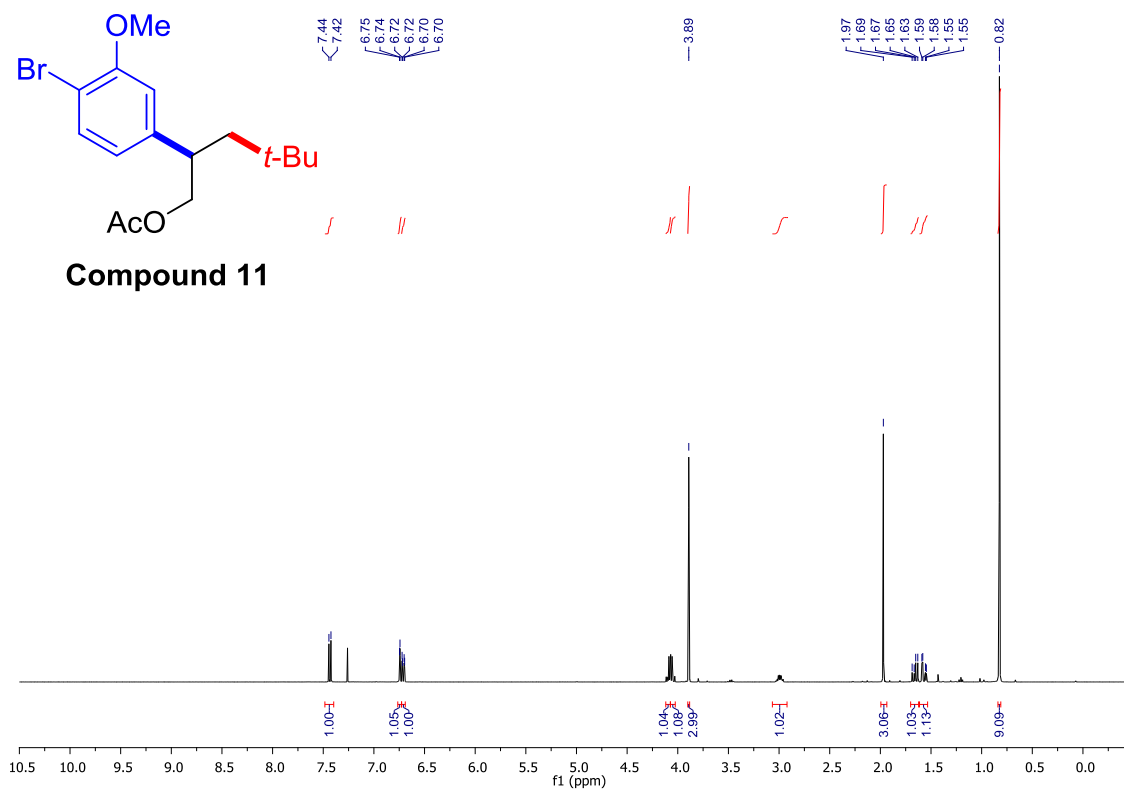

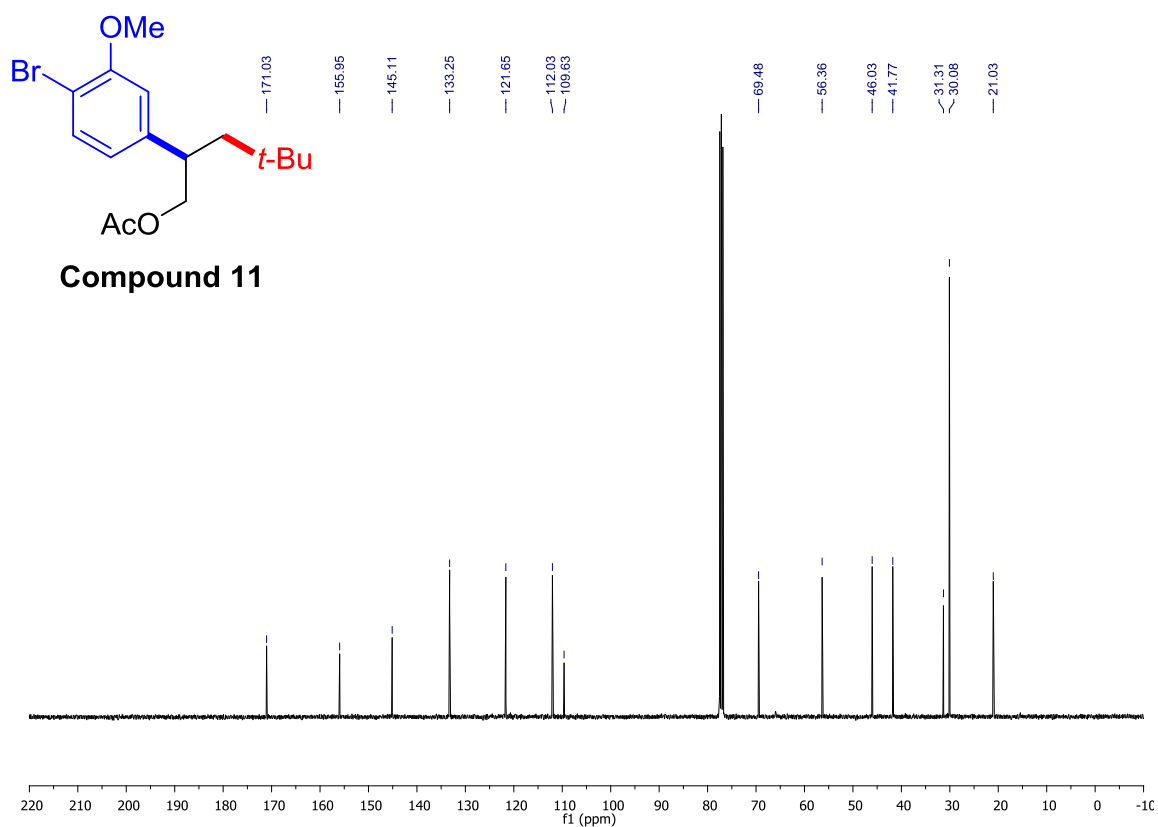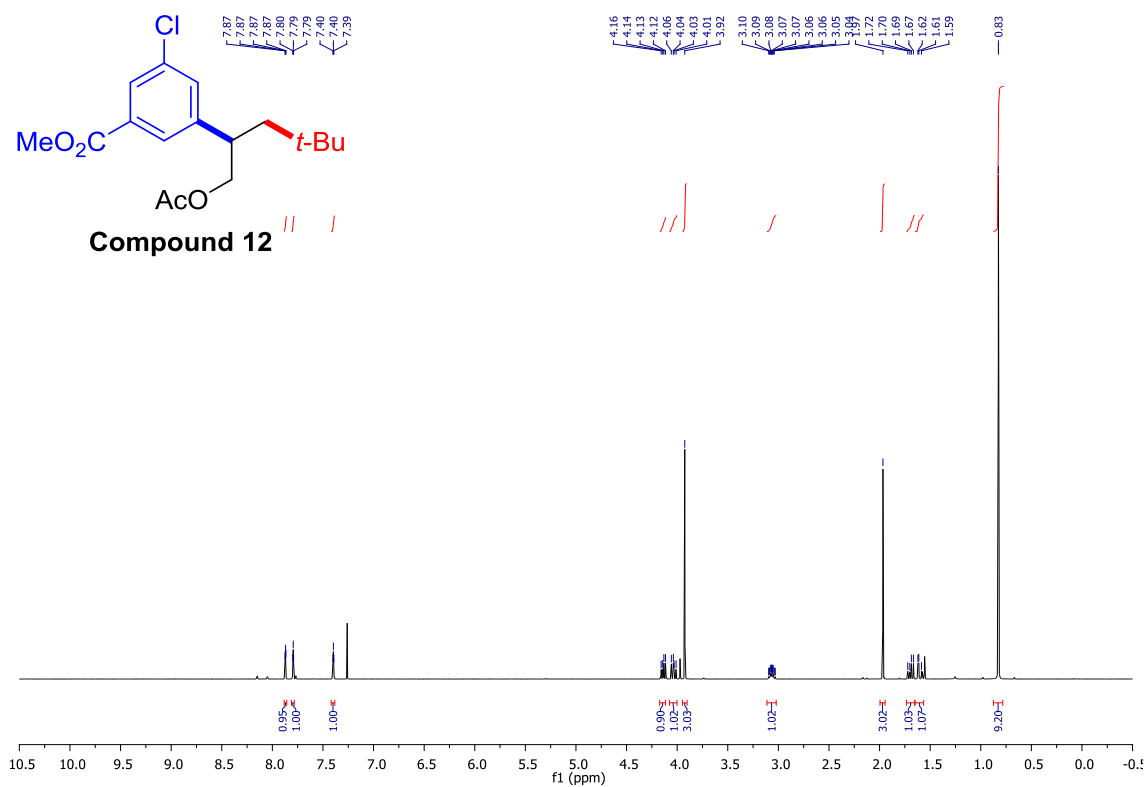

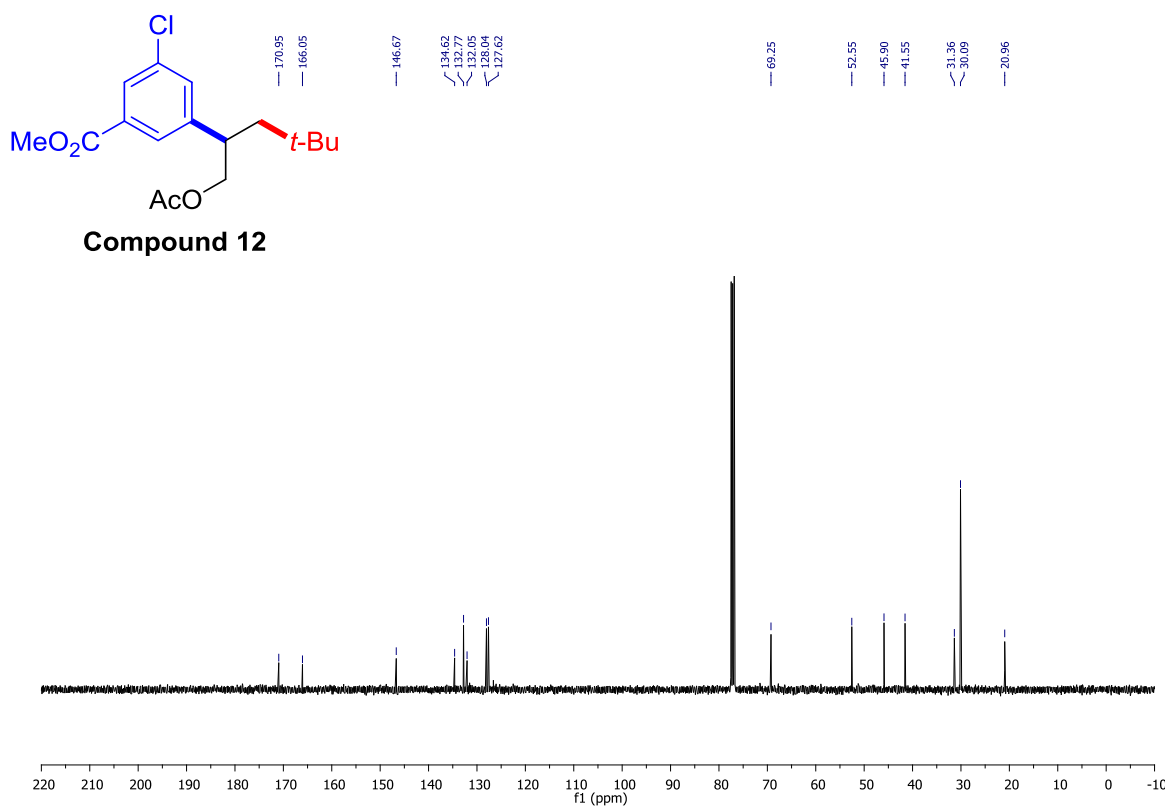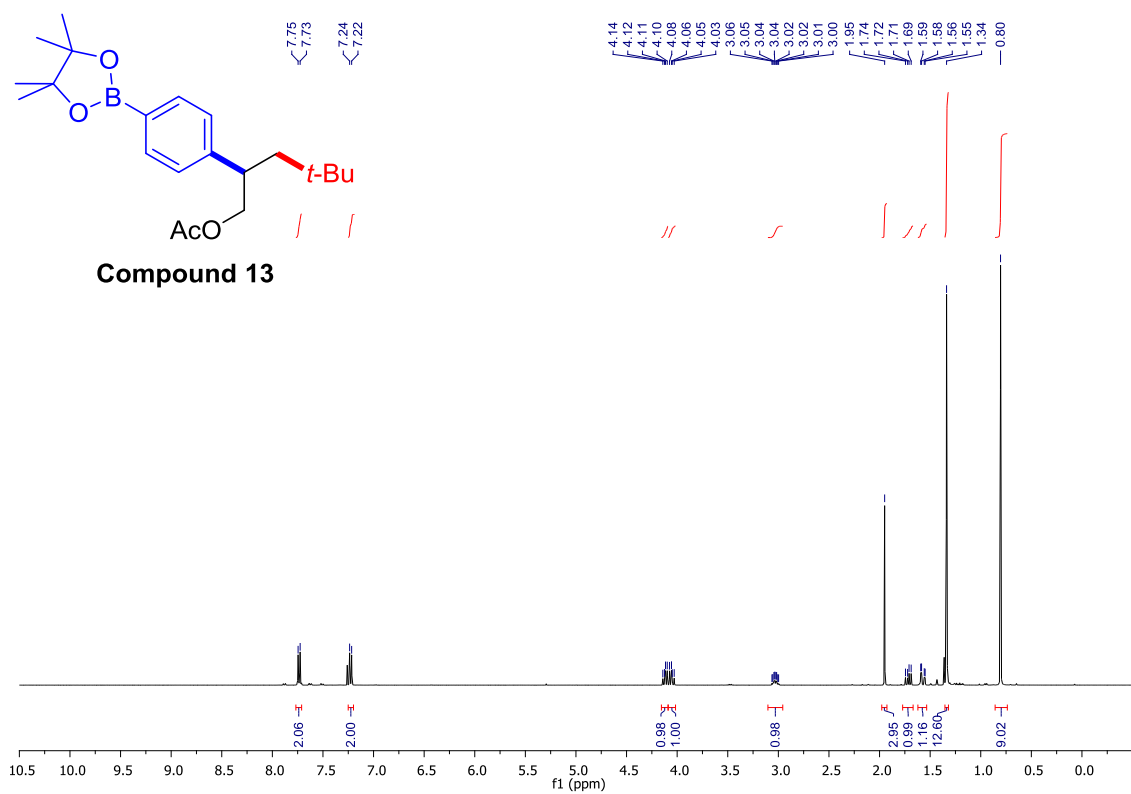

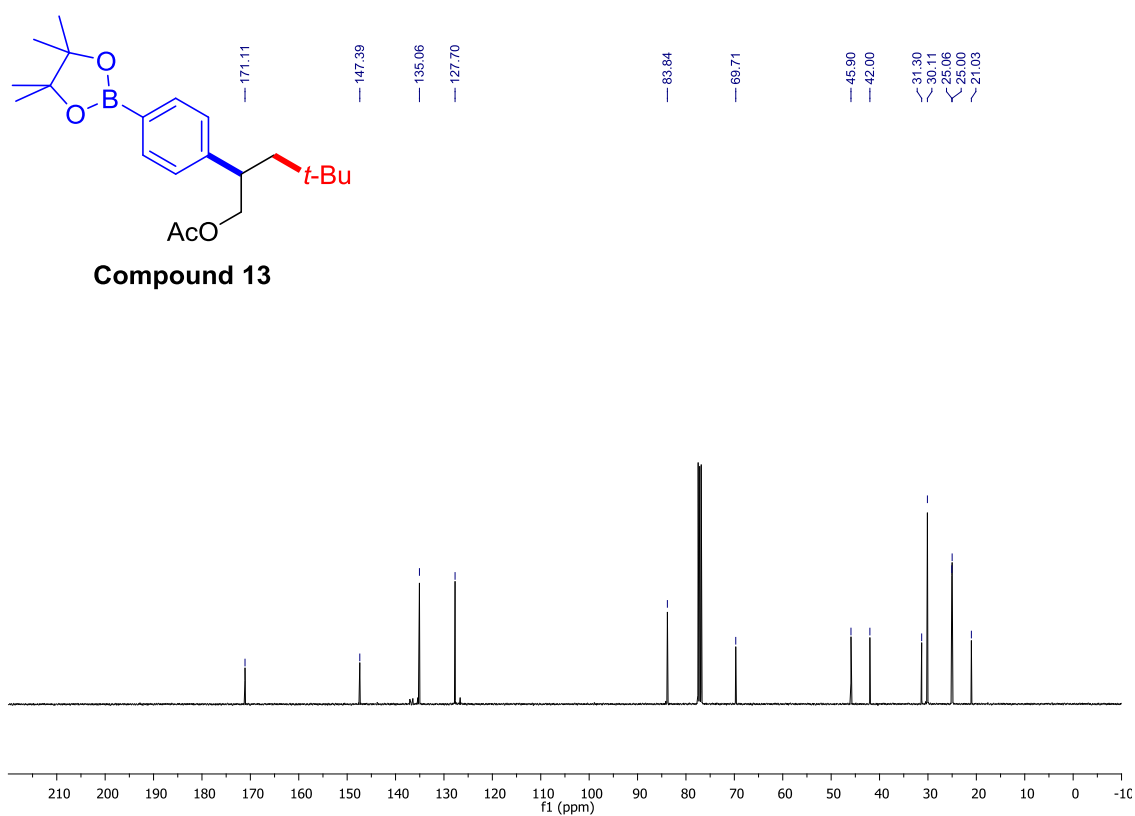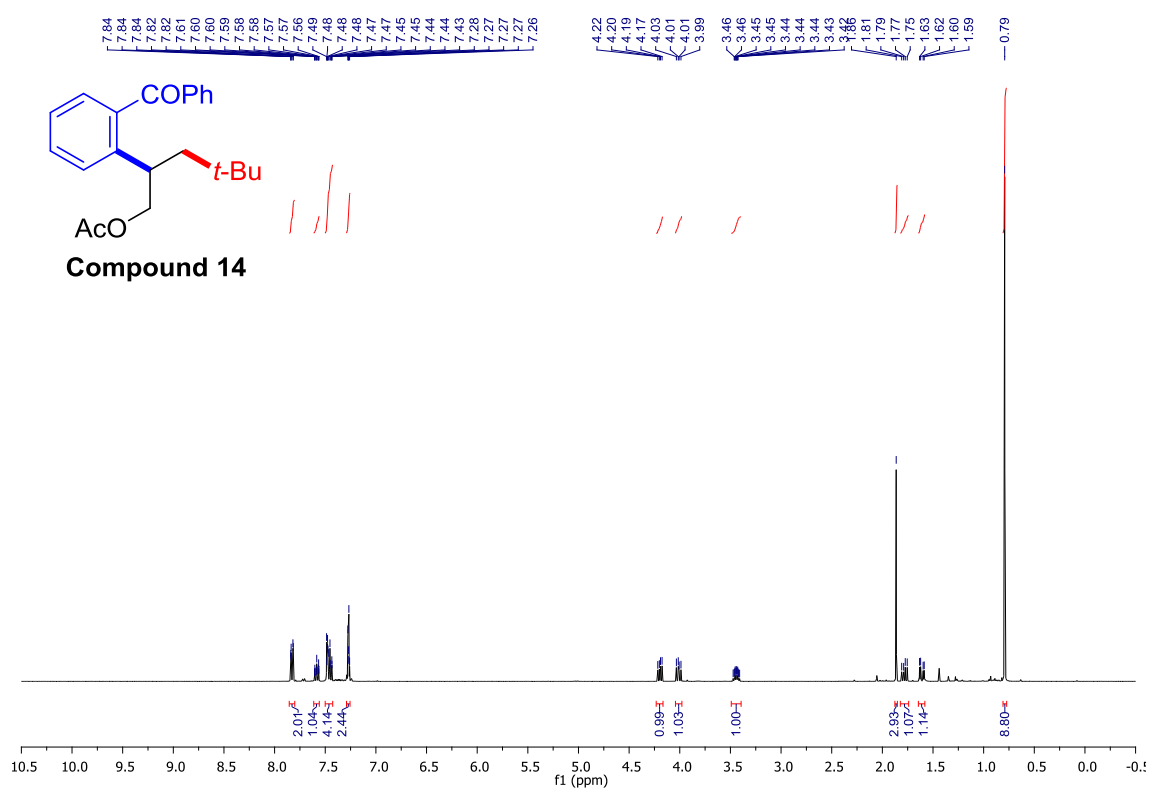

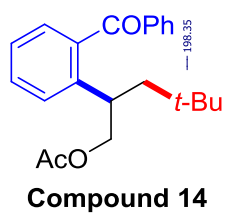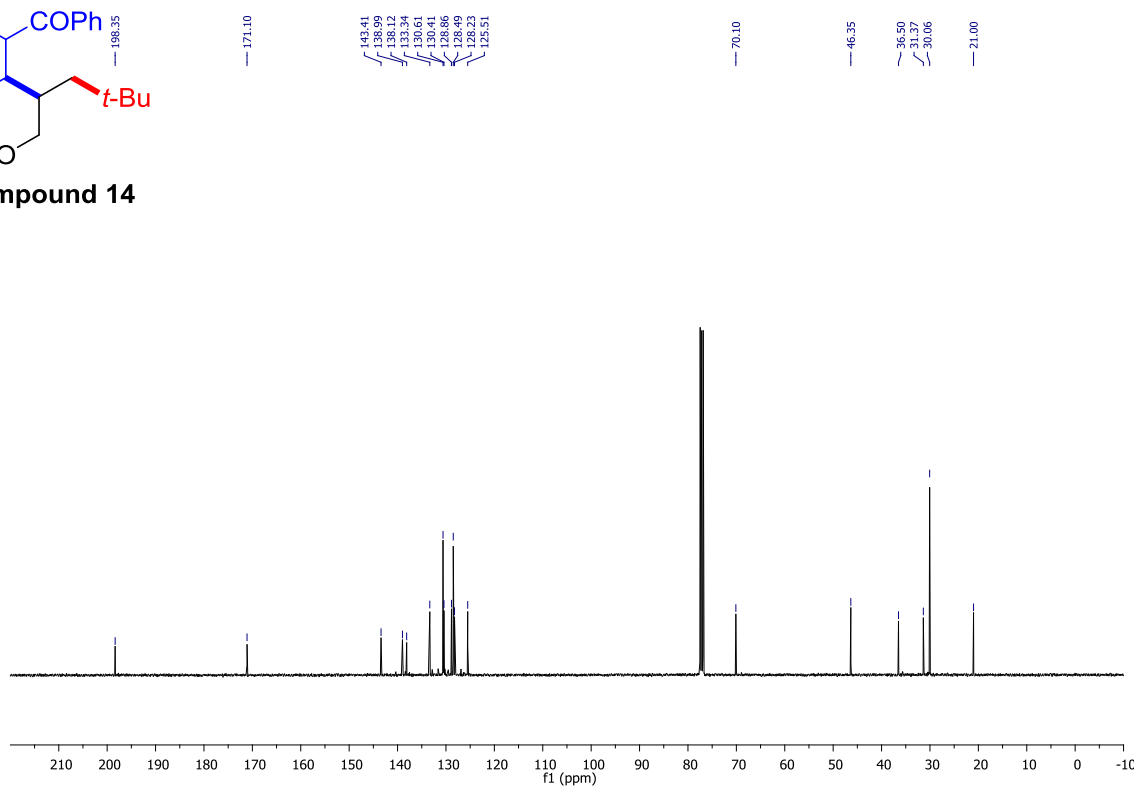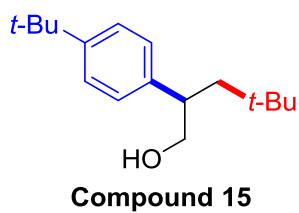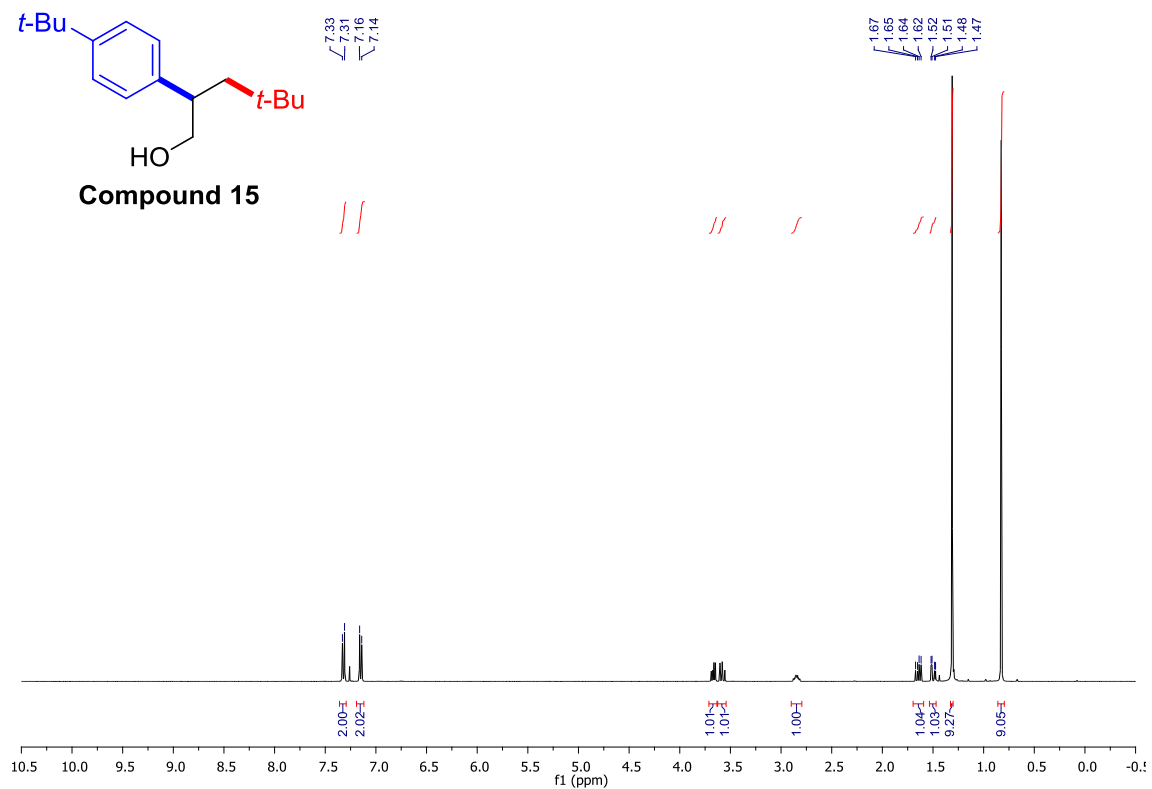

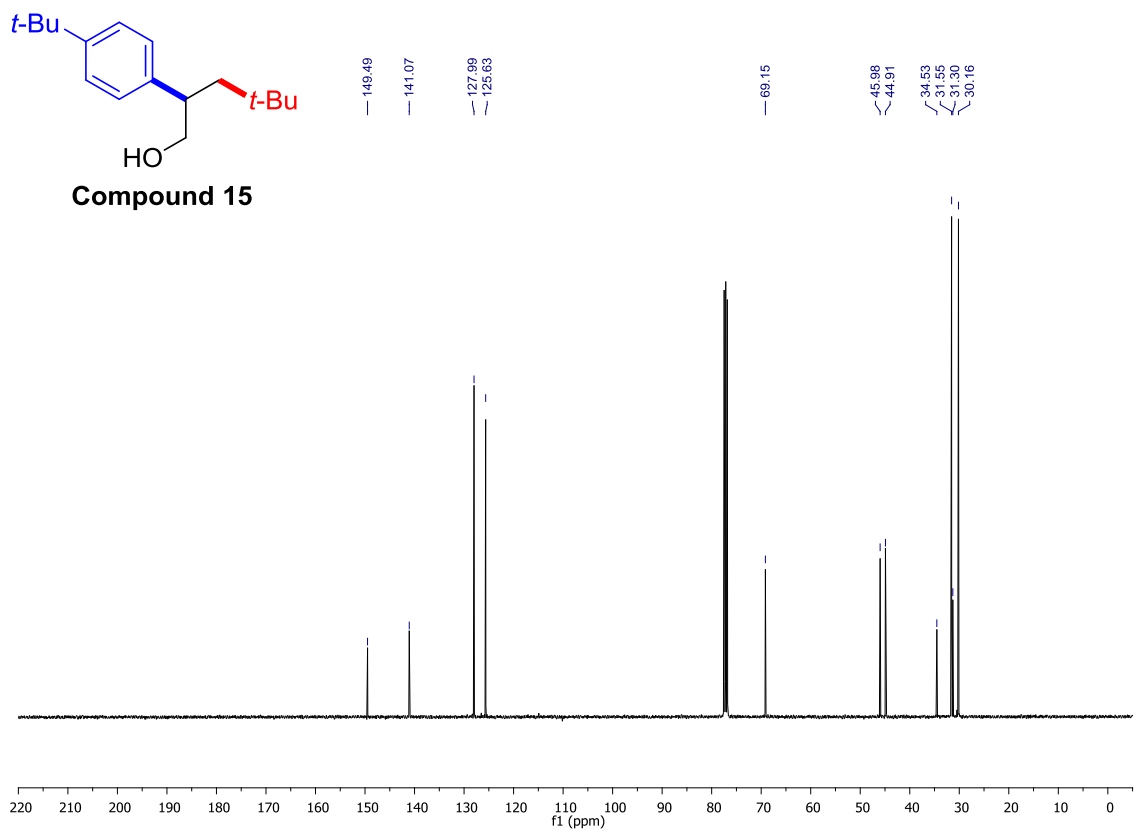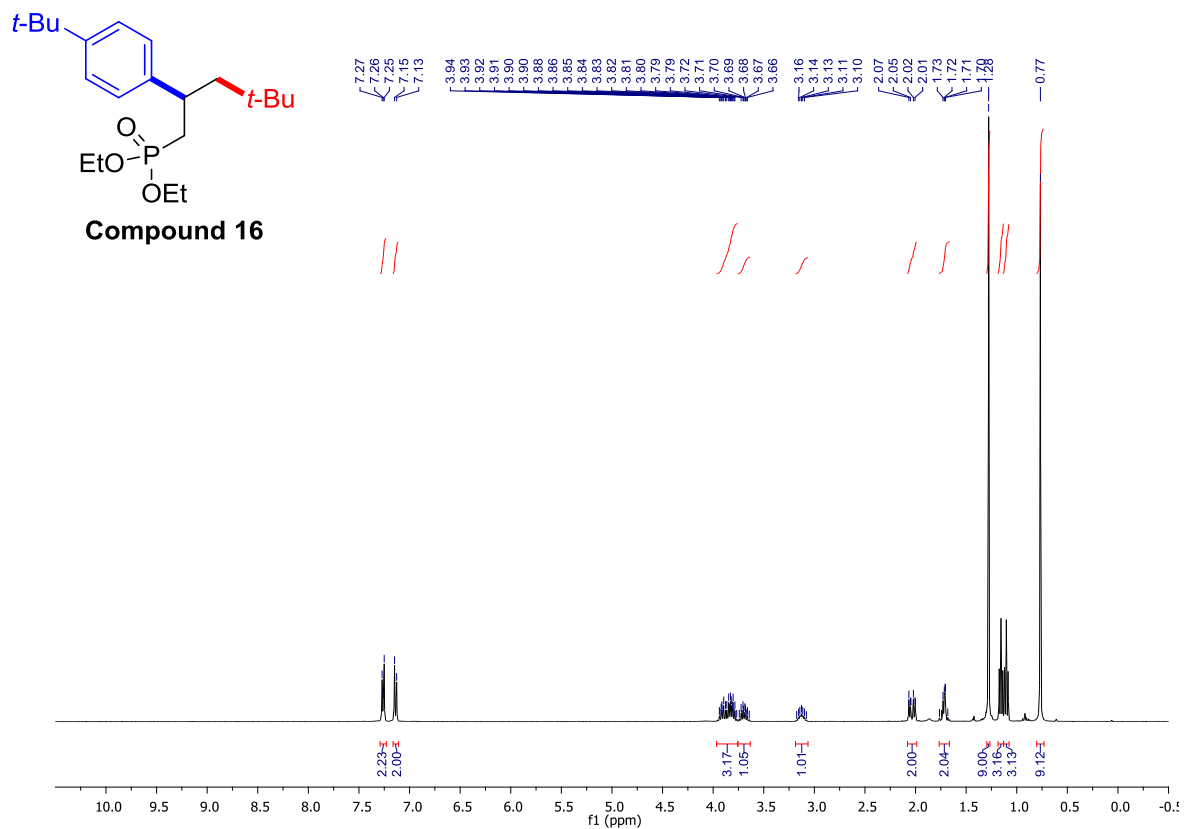

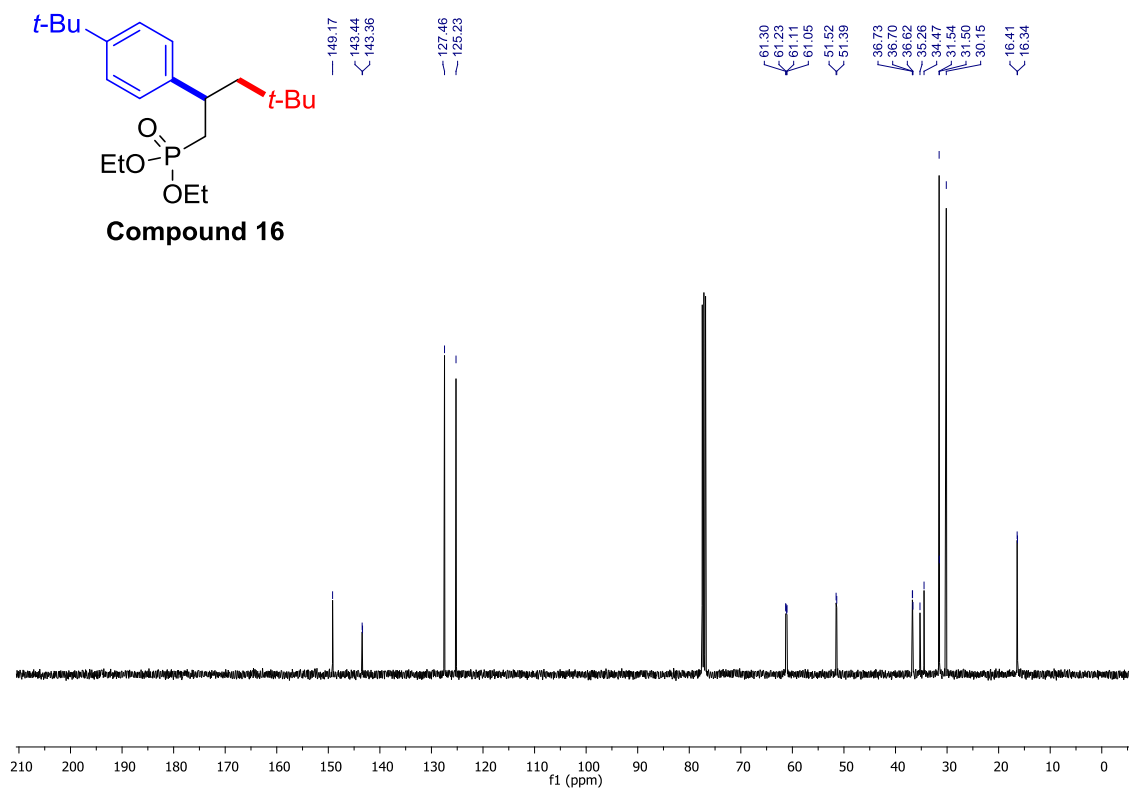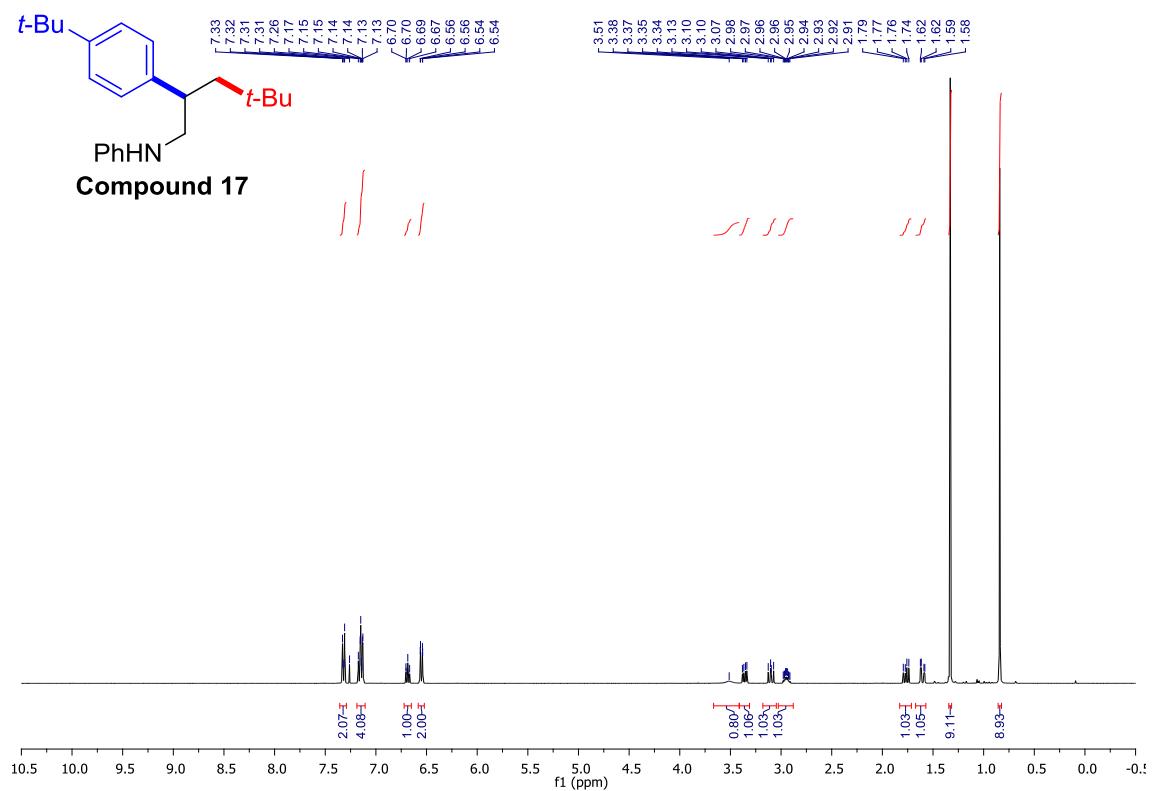

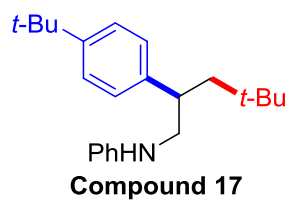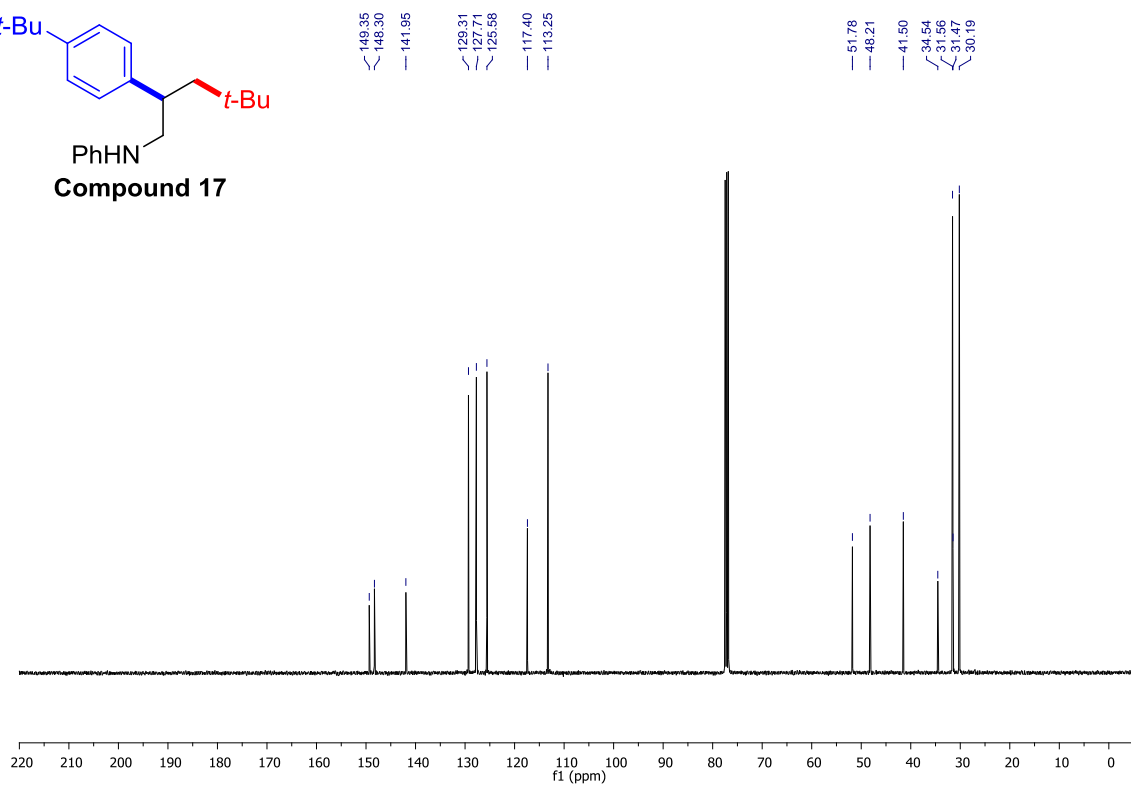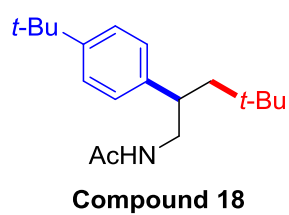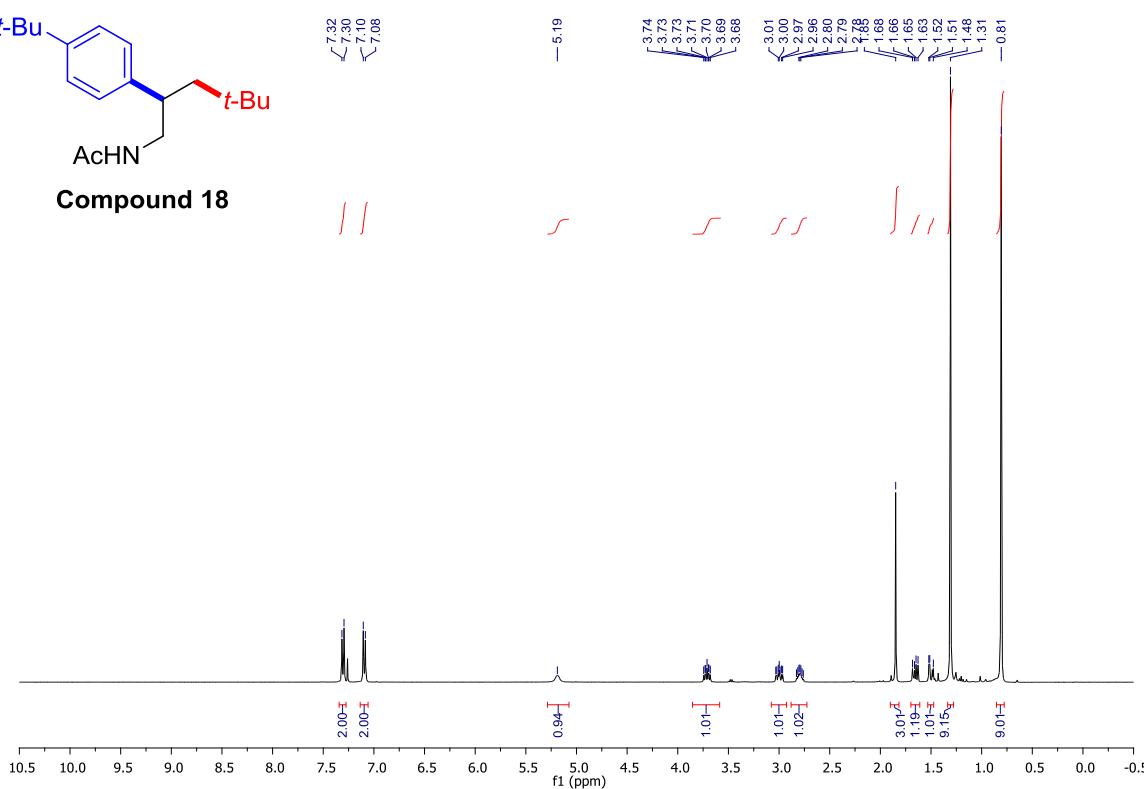



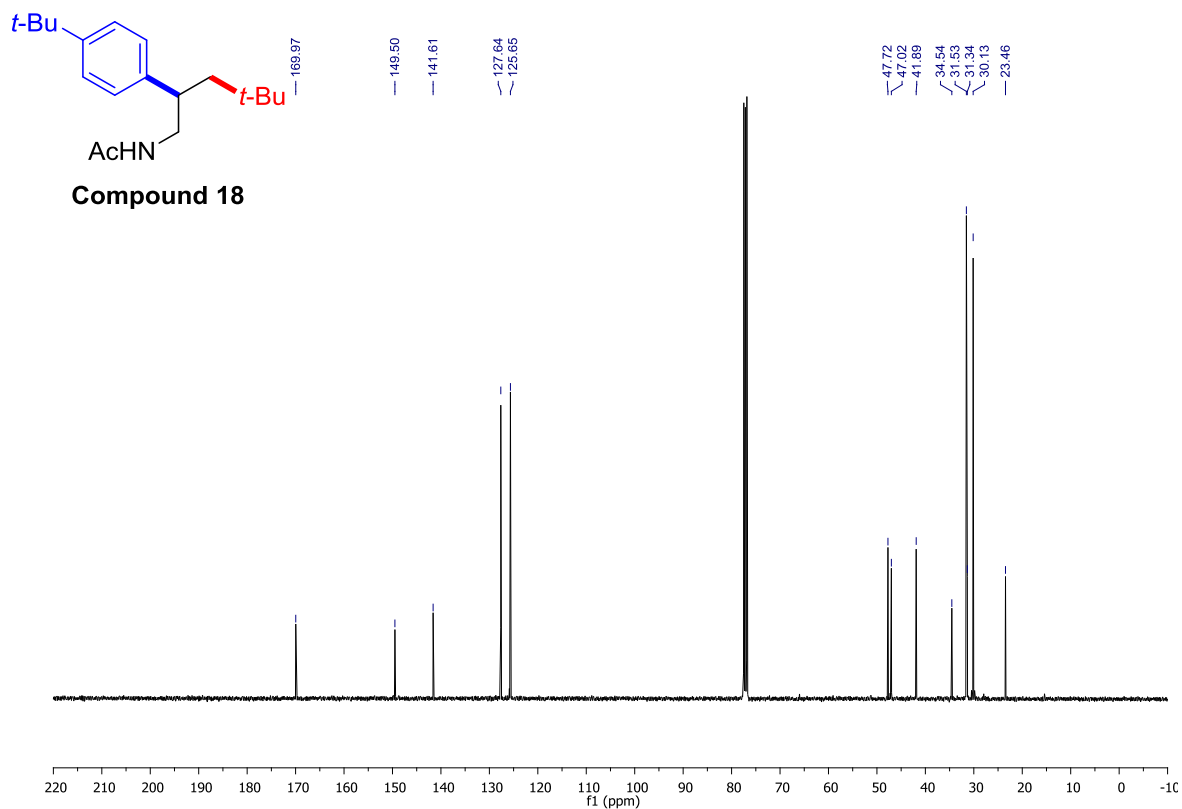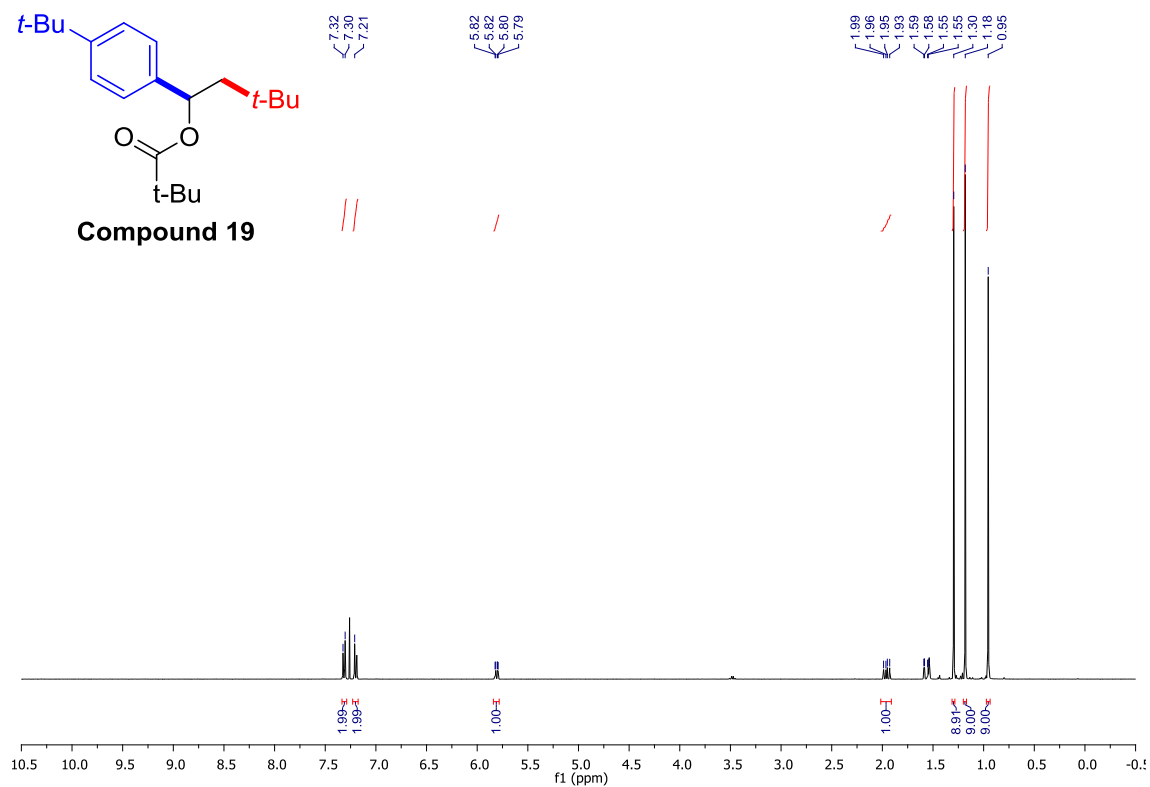

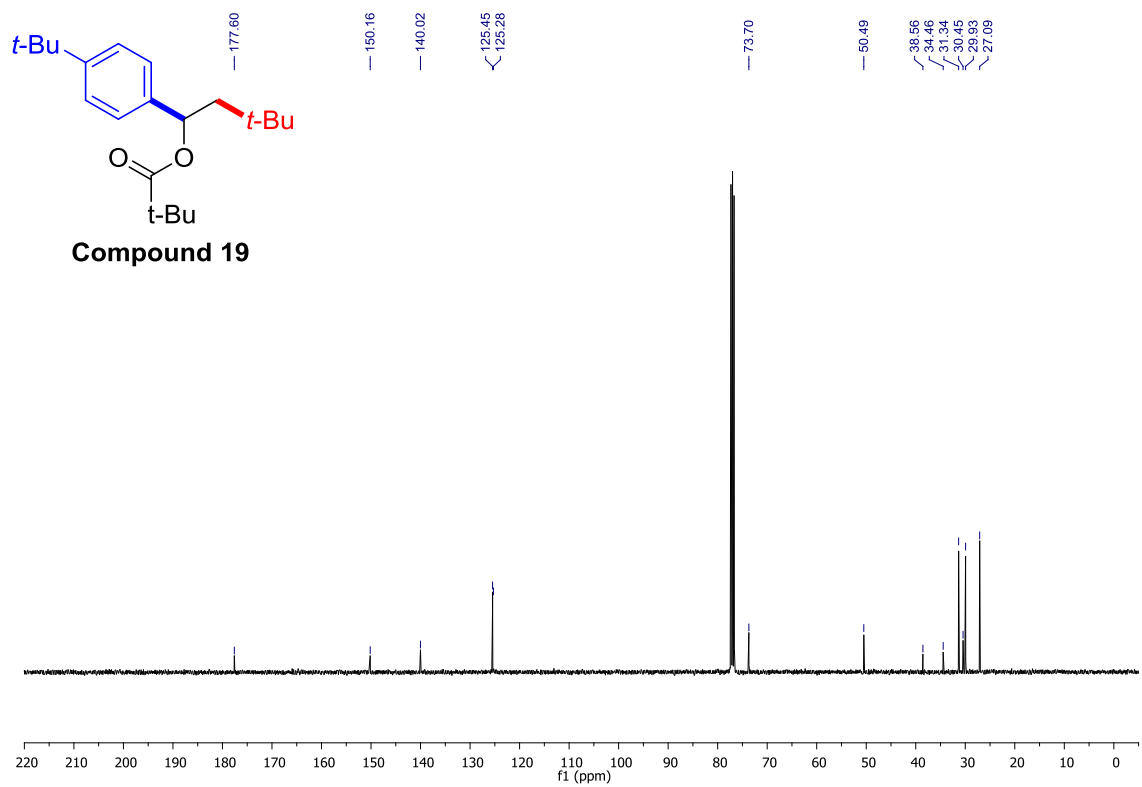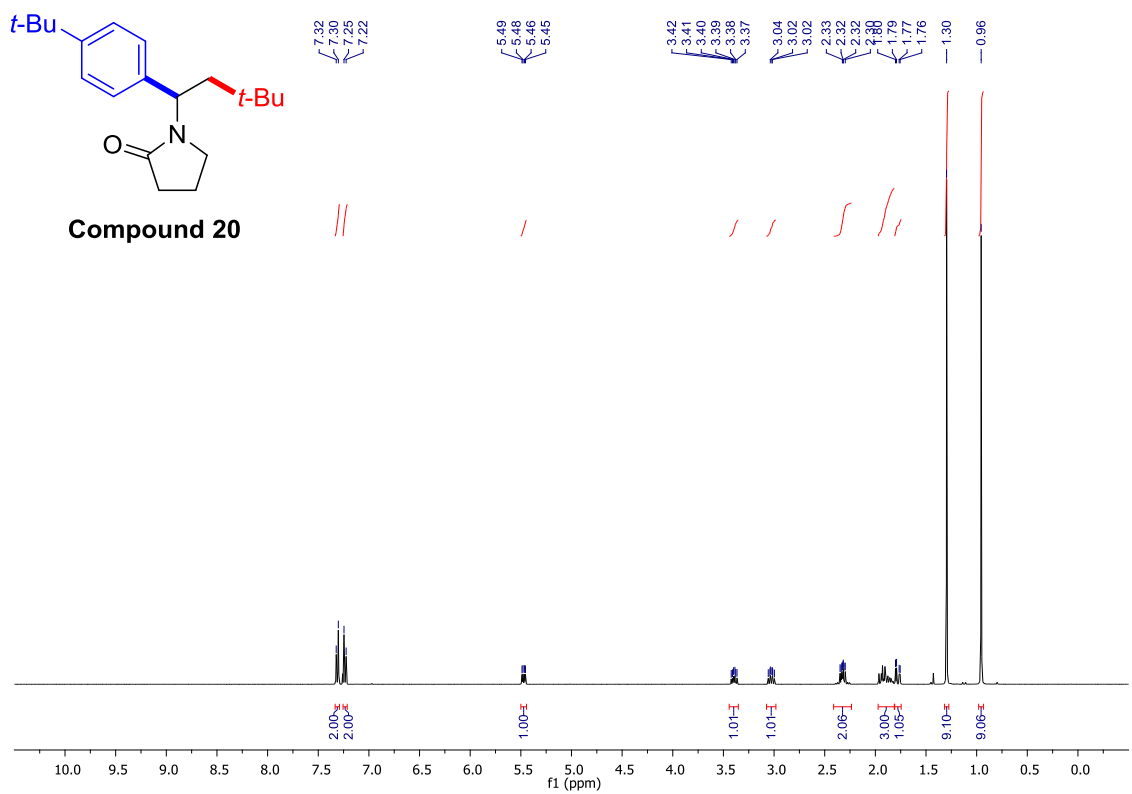

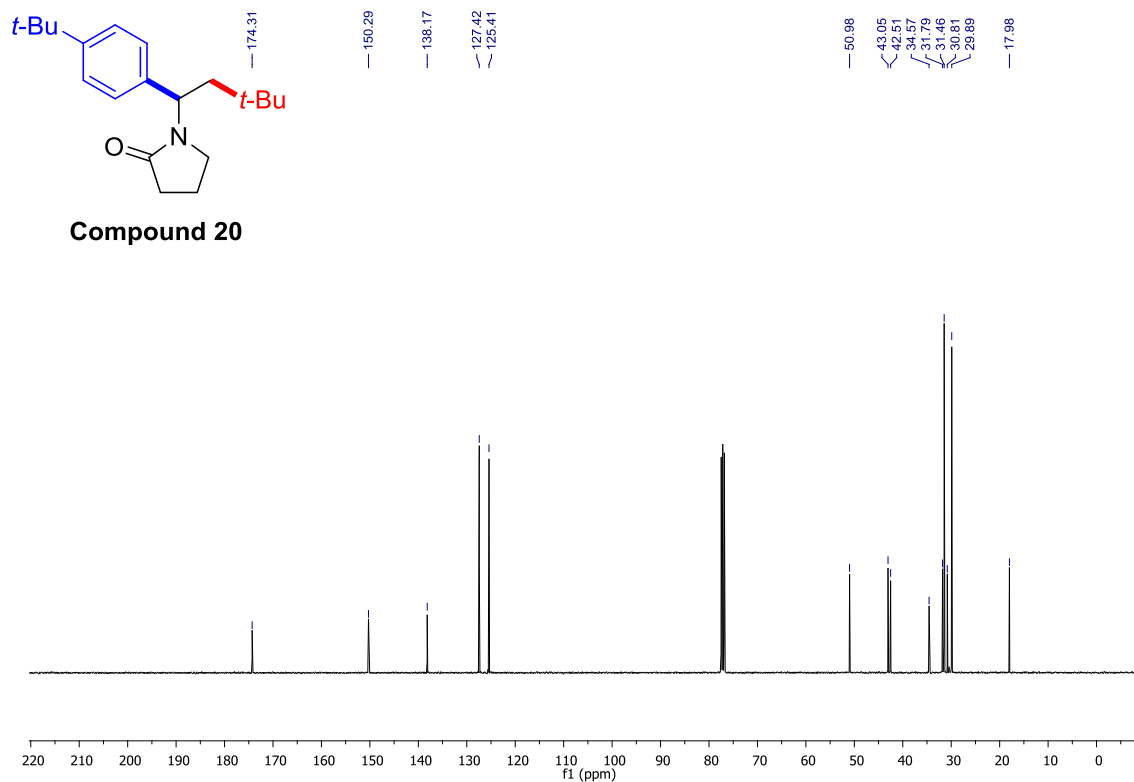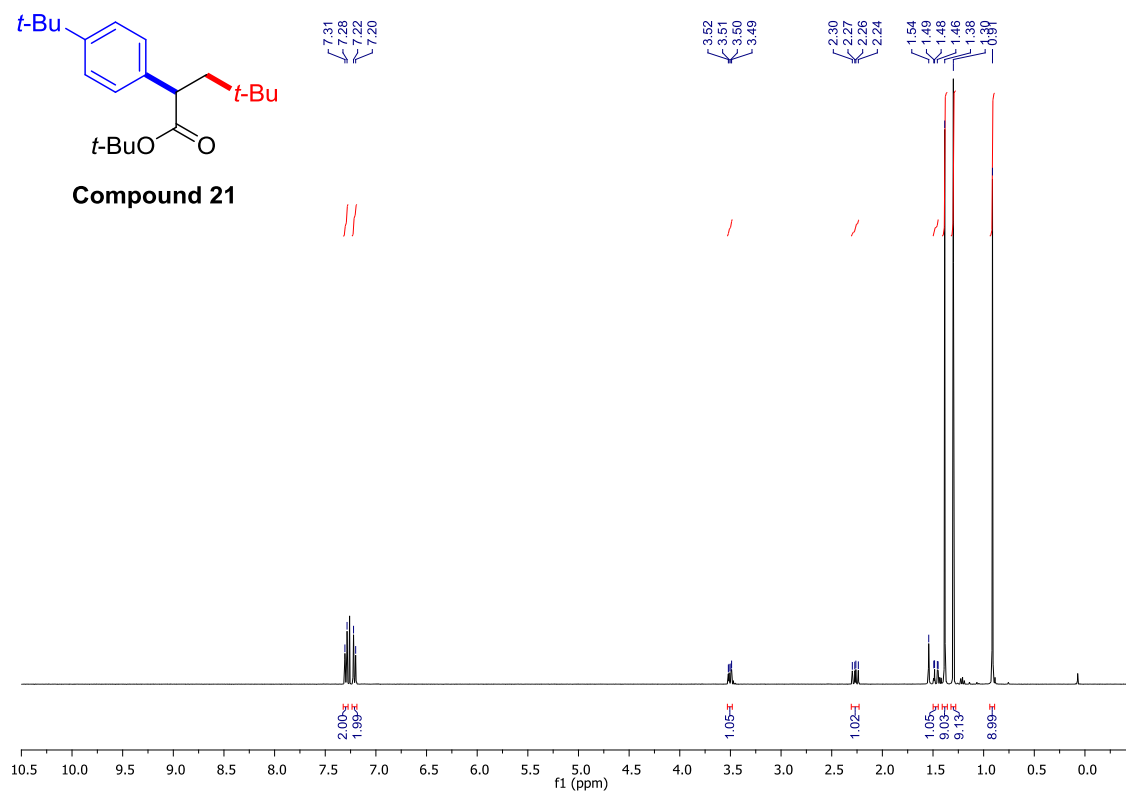

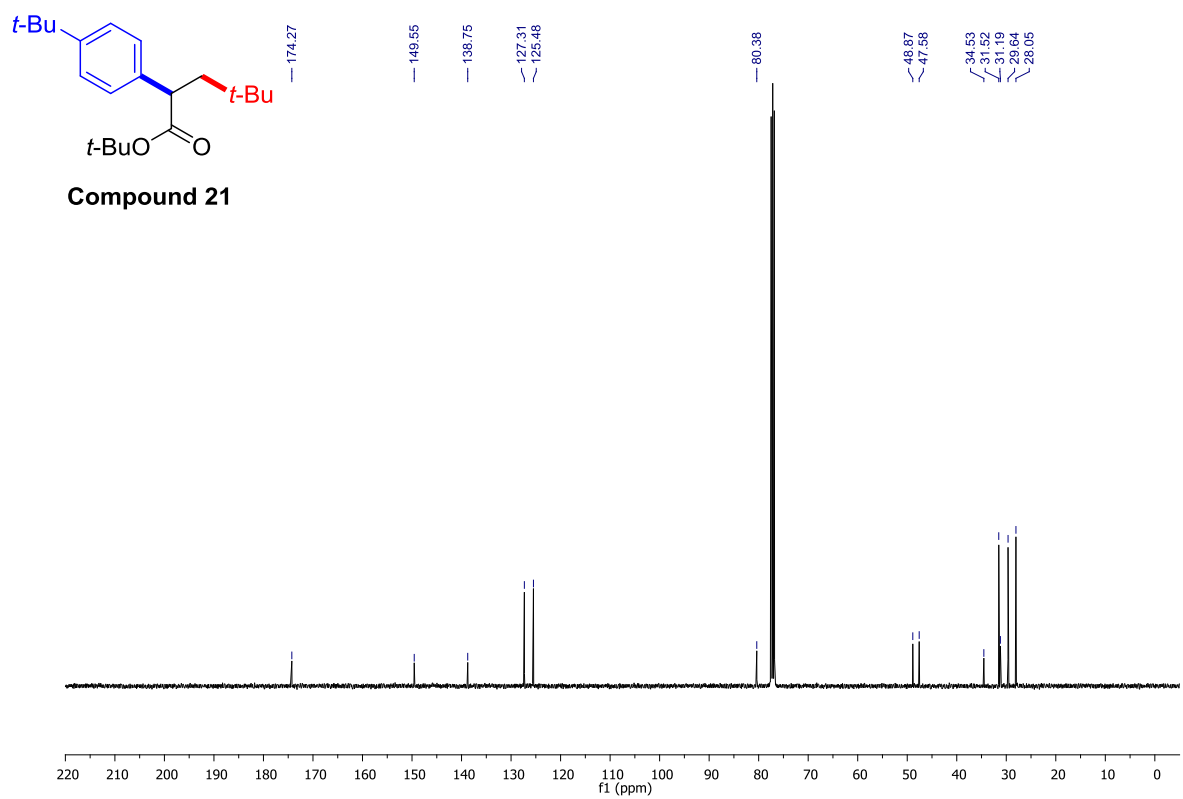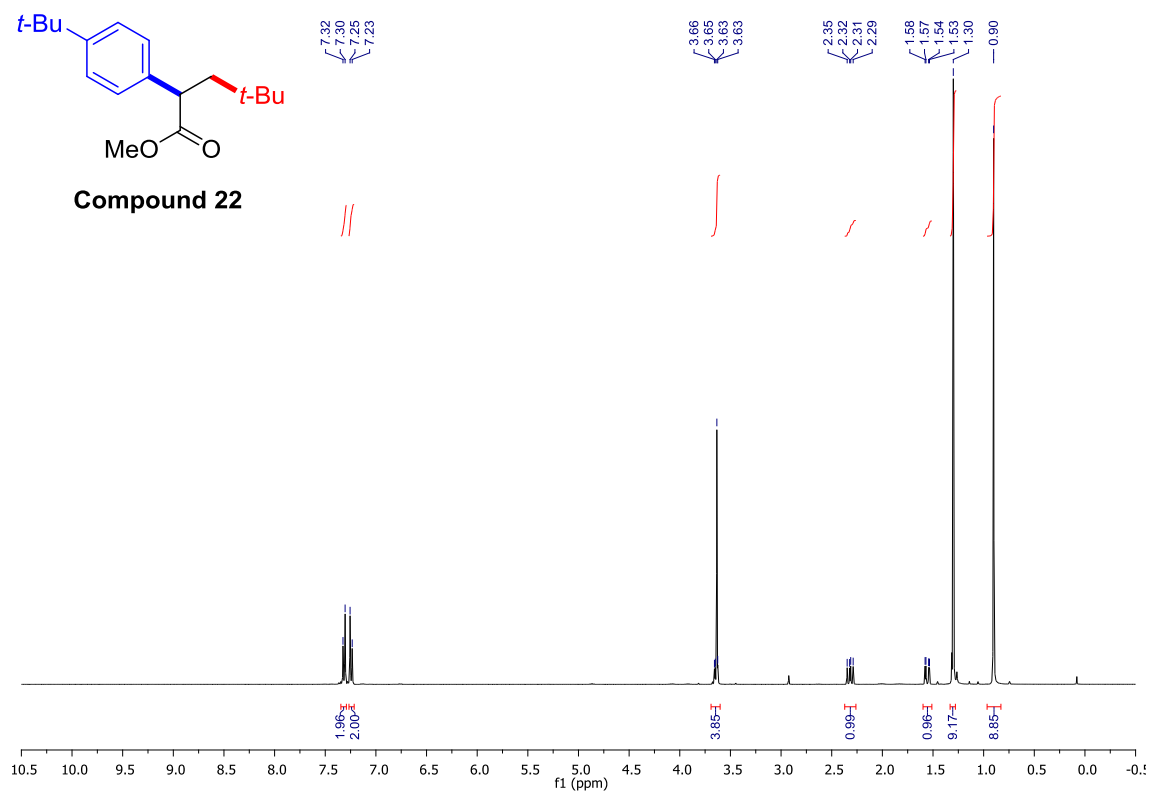

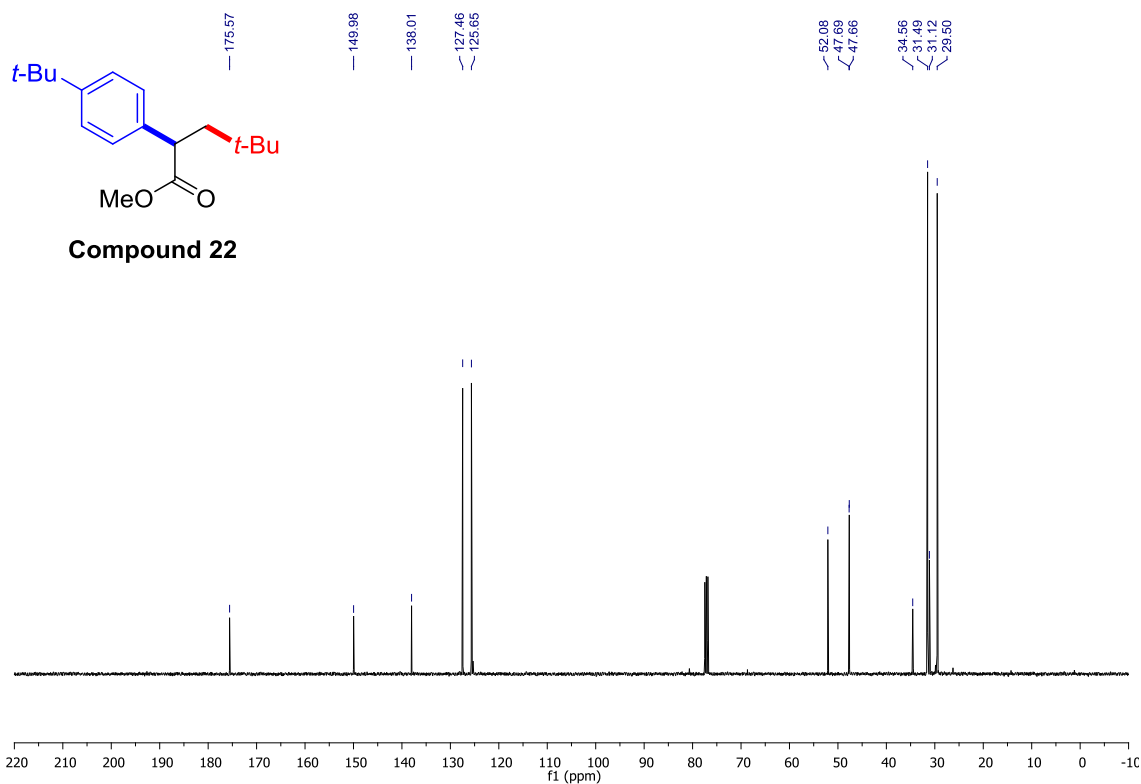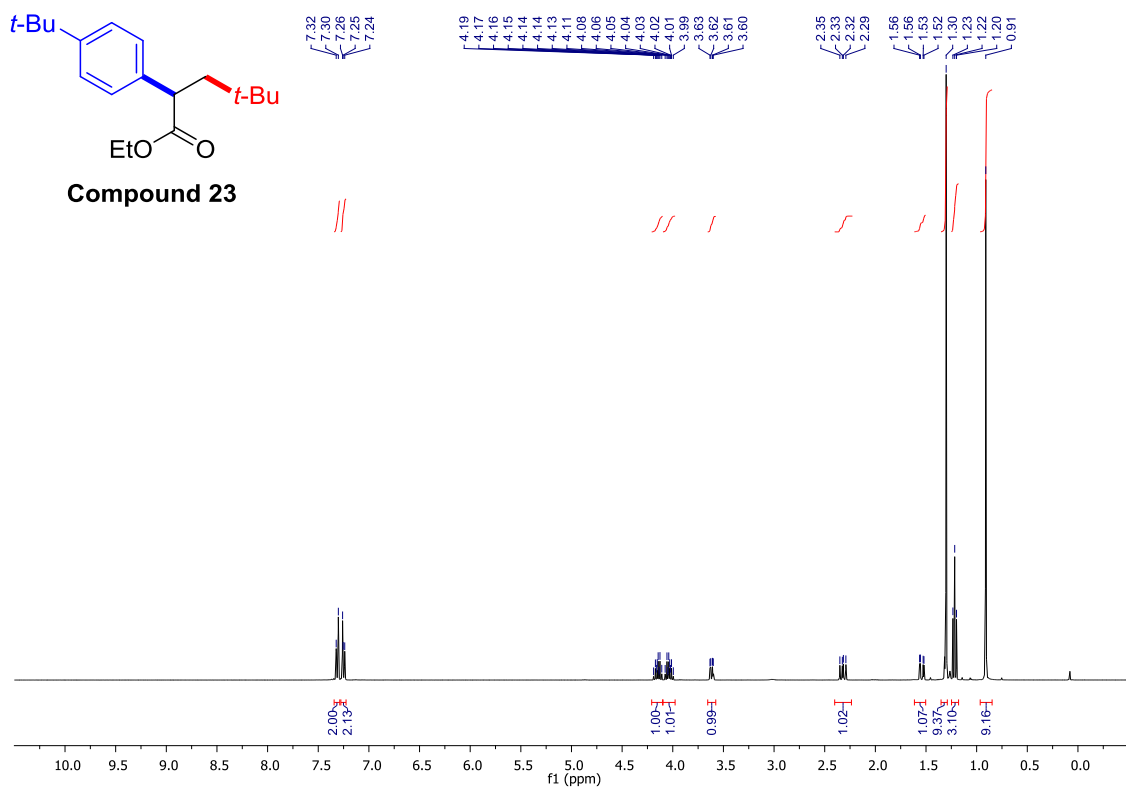

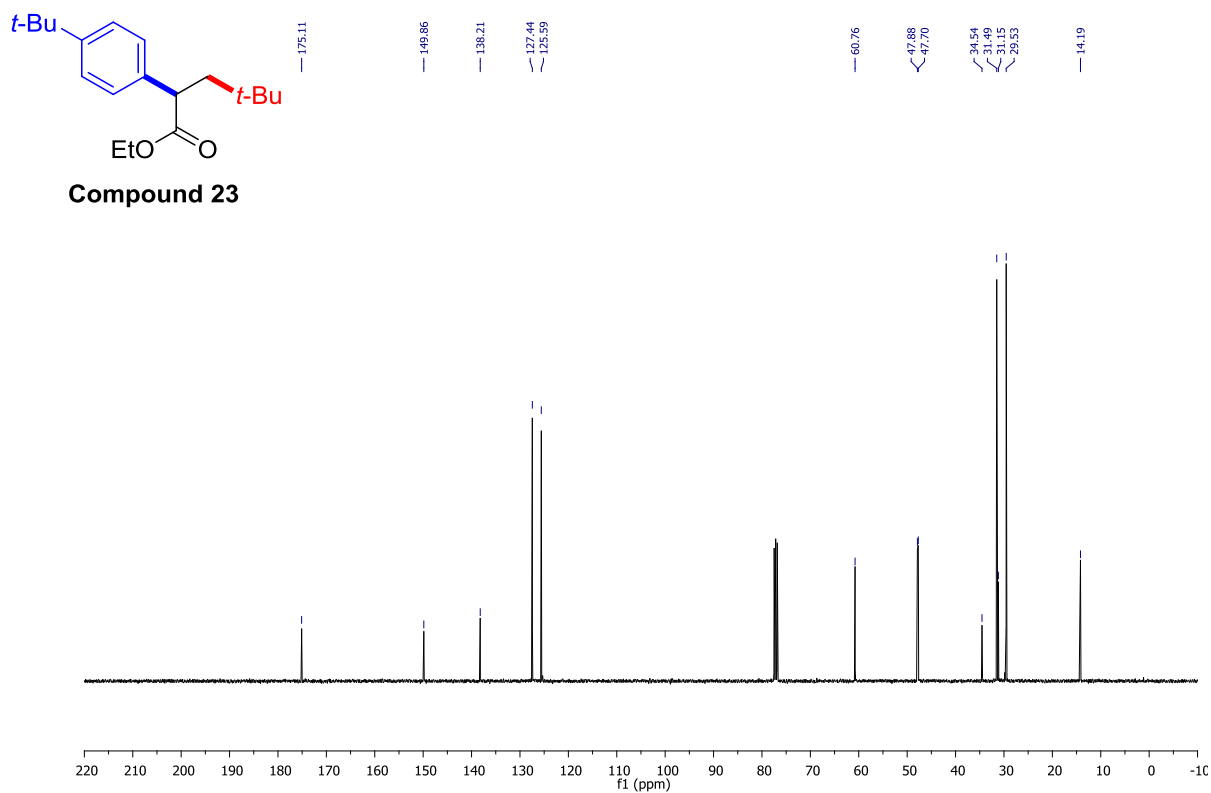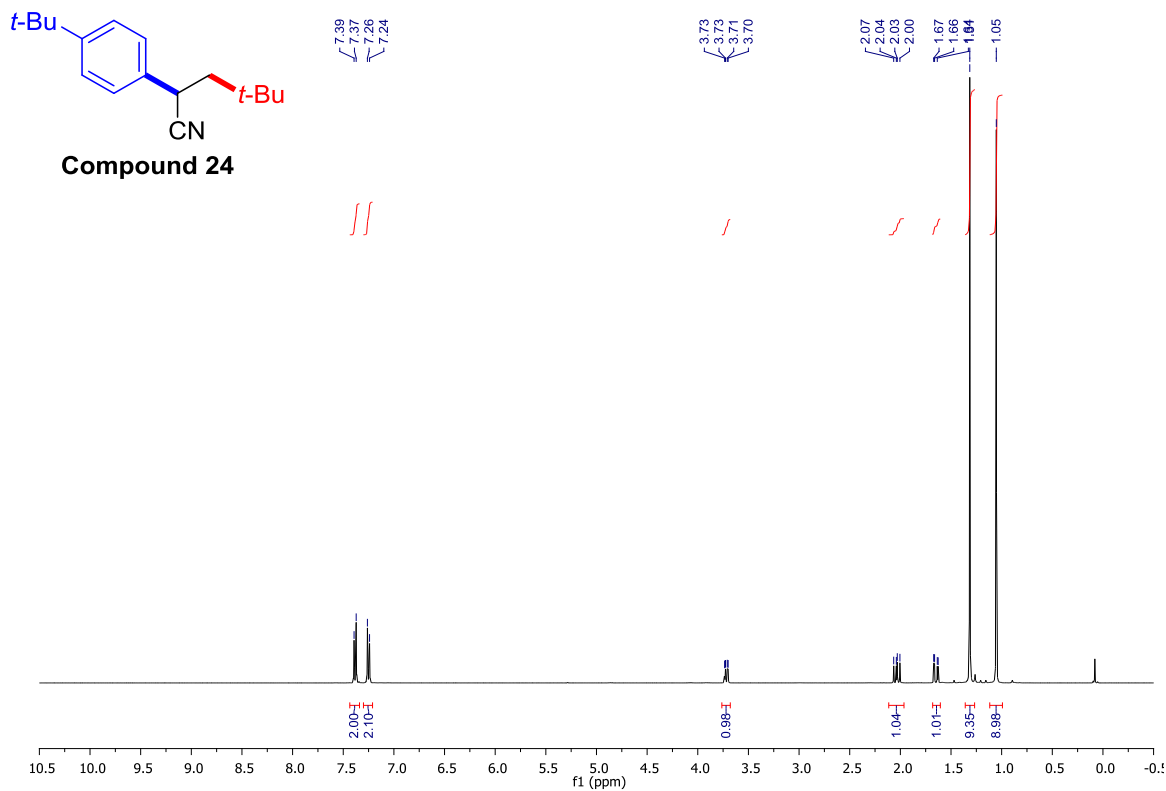

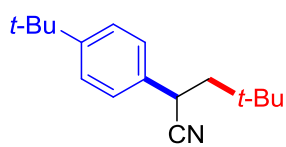

**Compound 24**

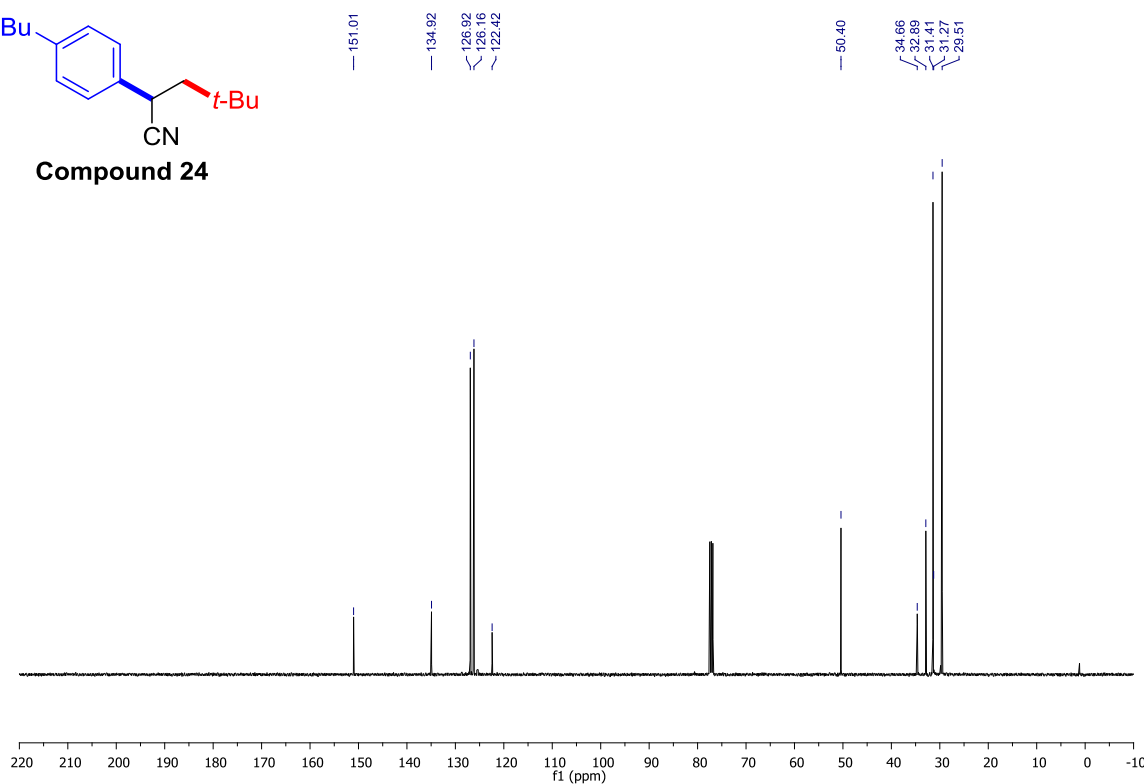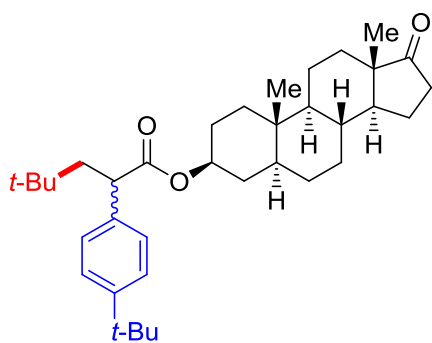

**Compound 25**

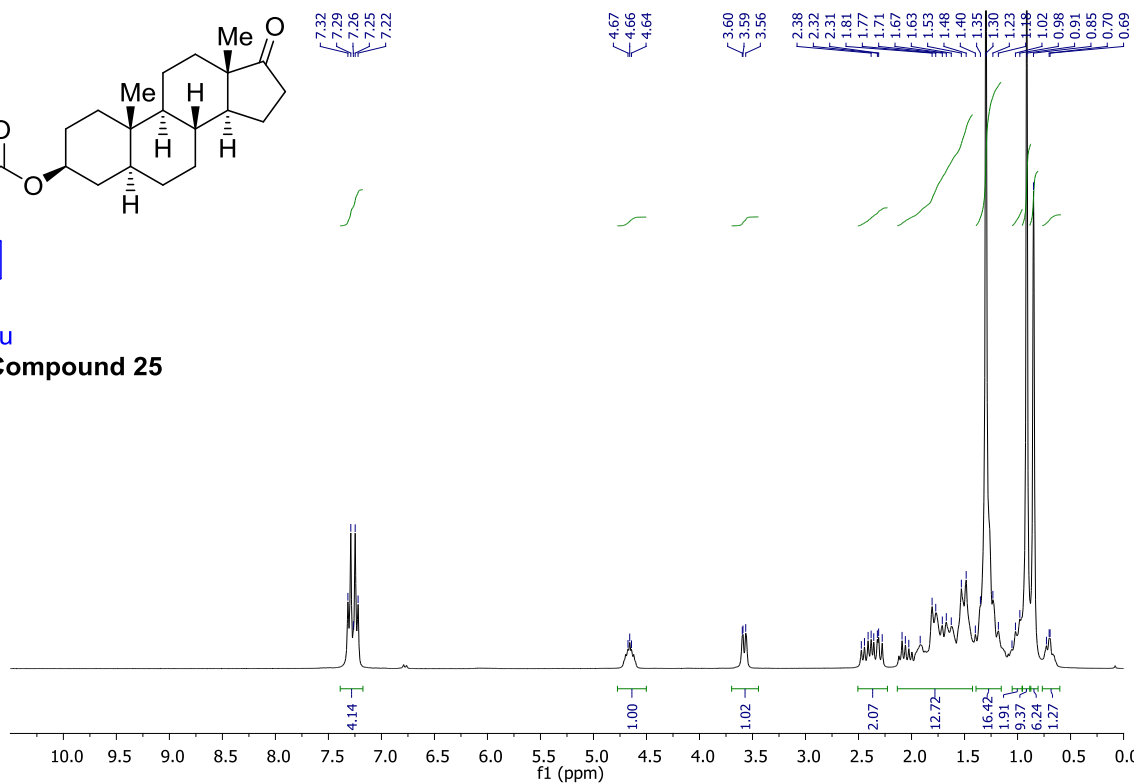

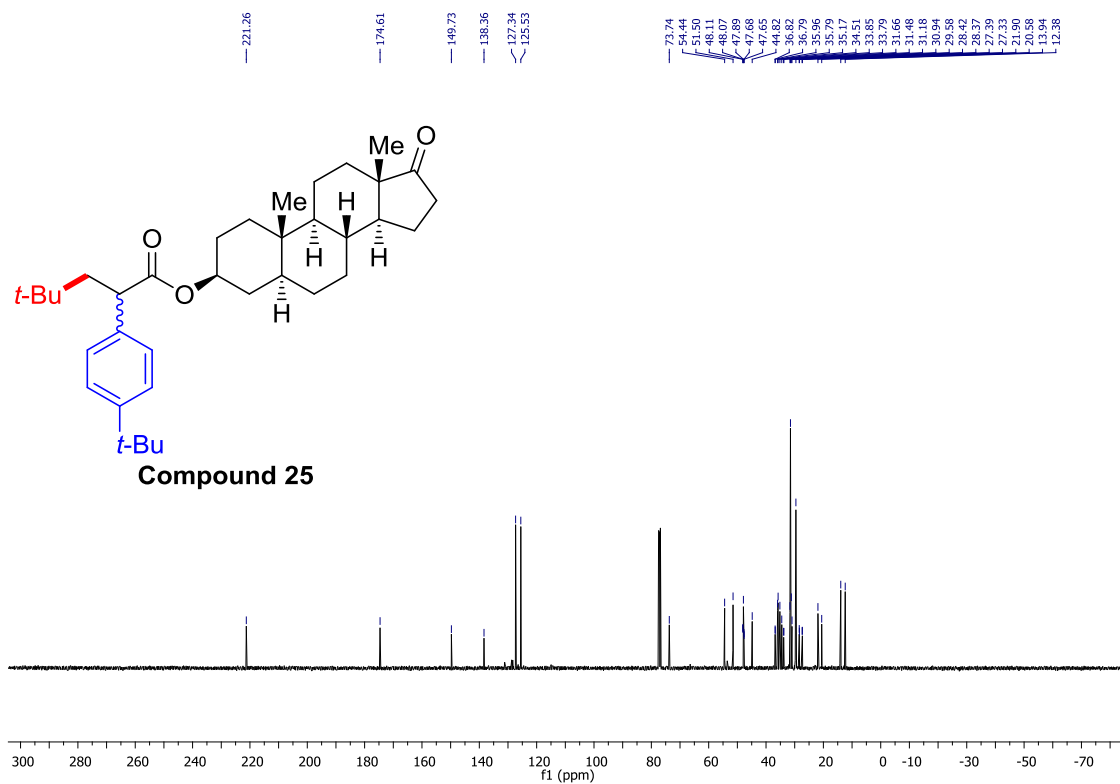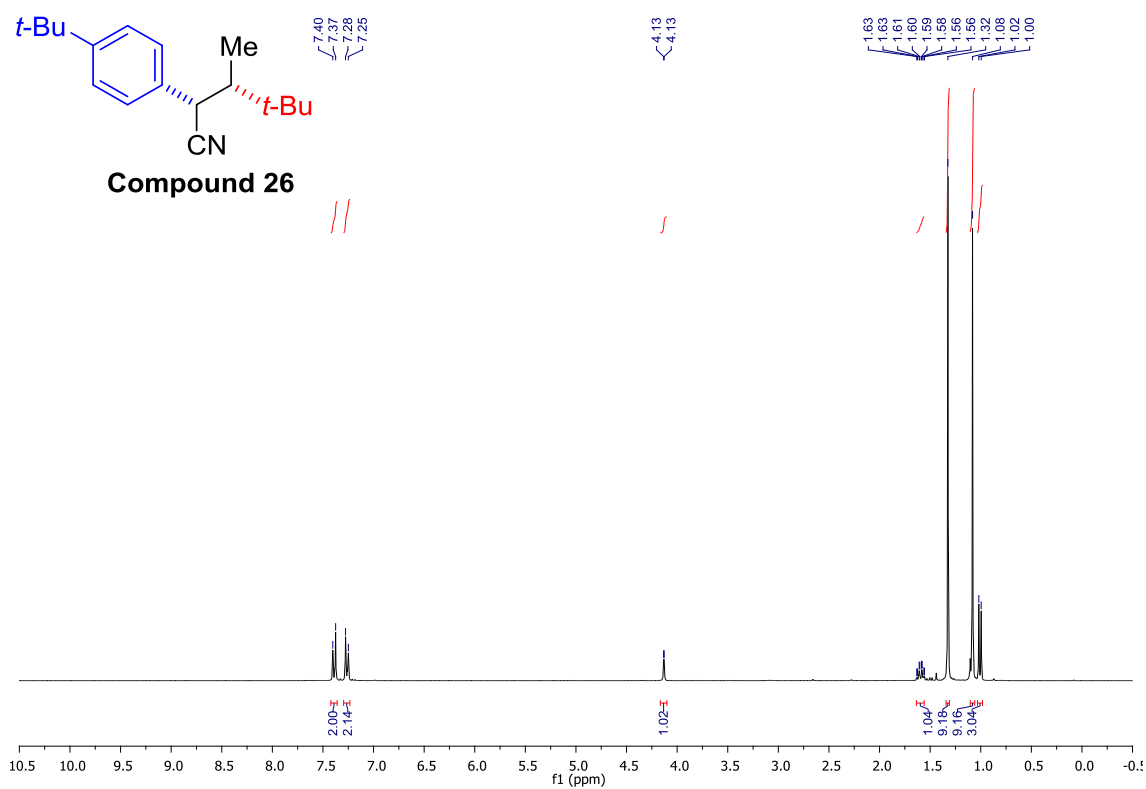



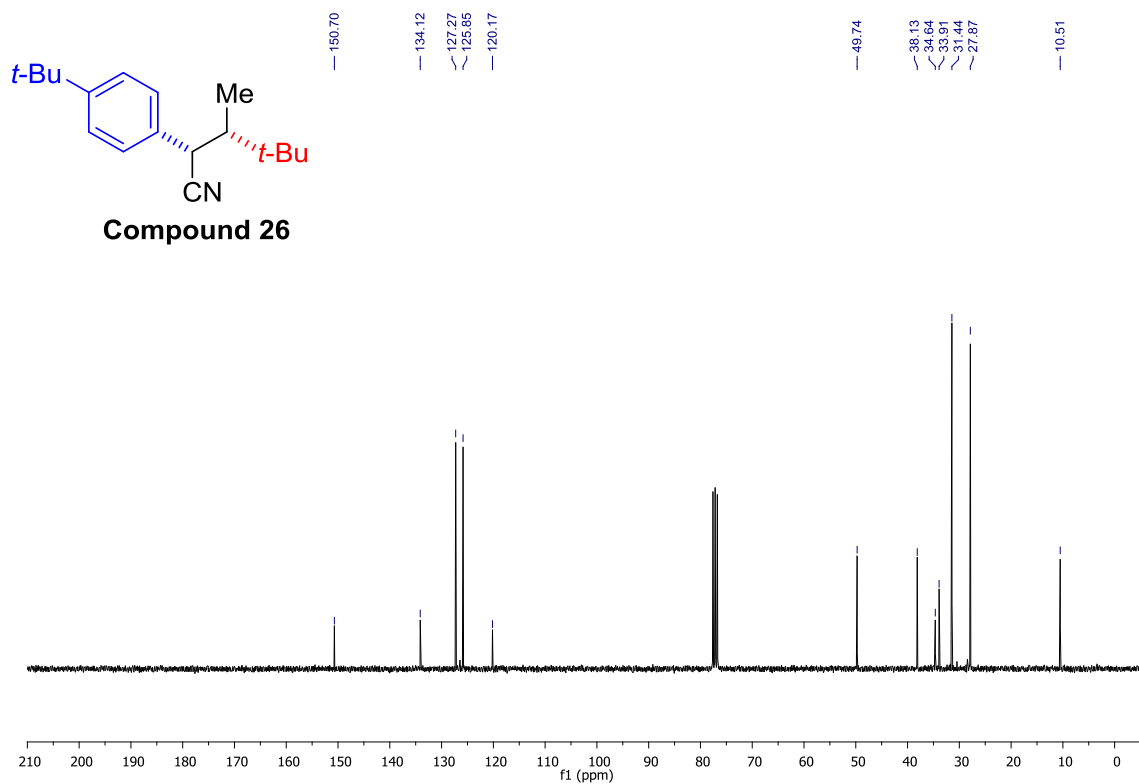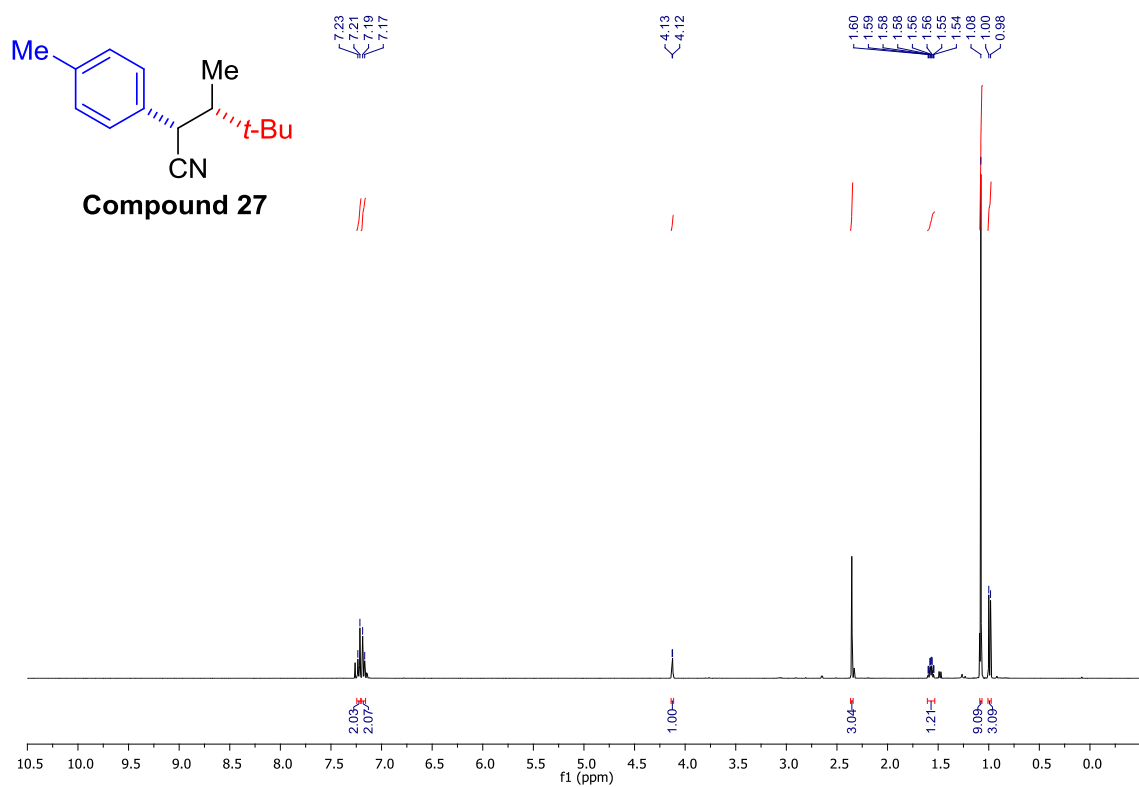

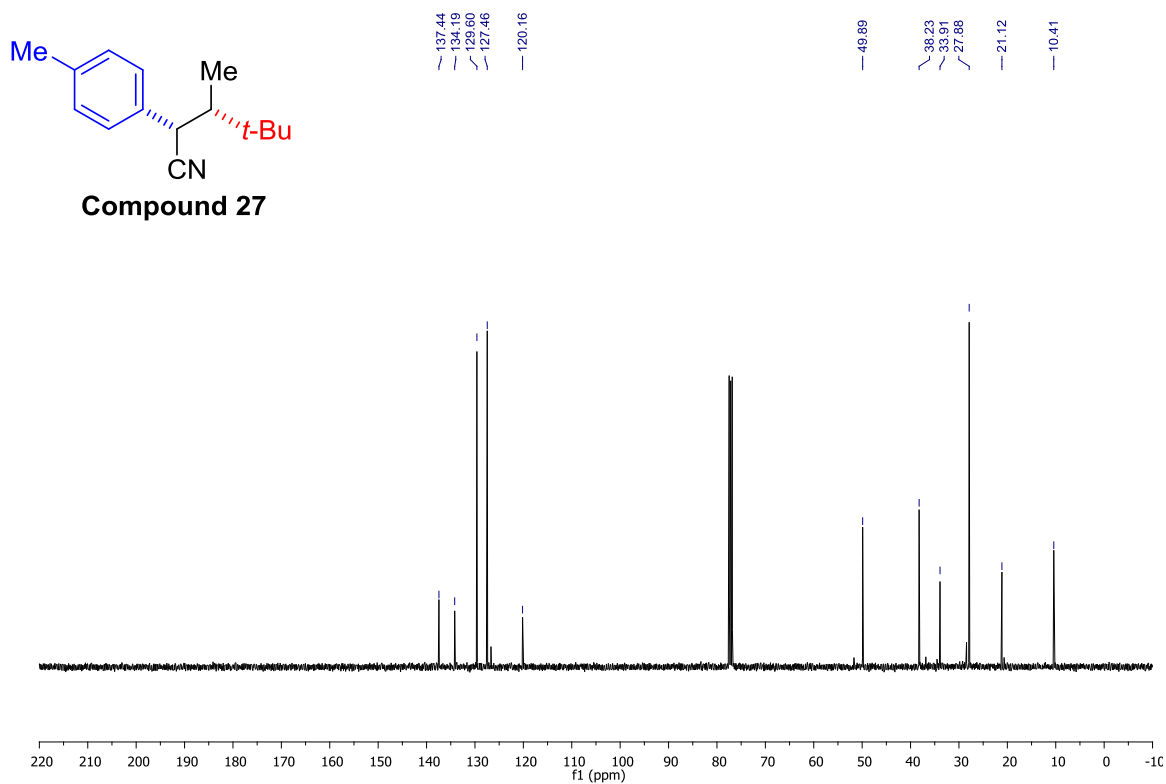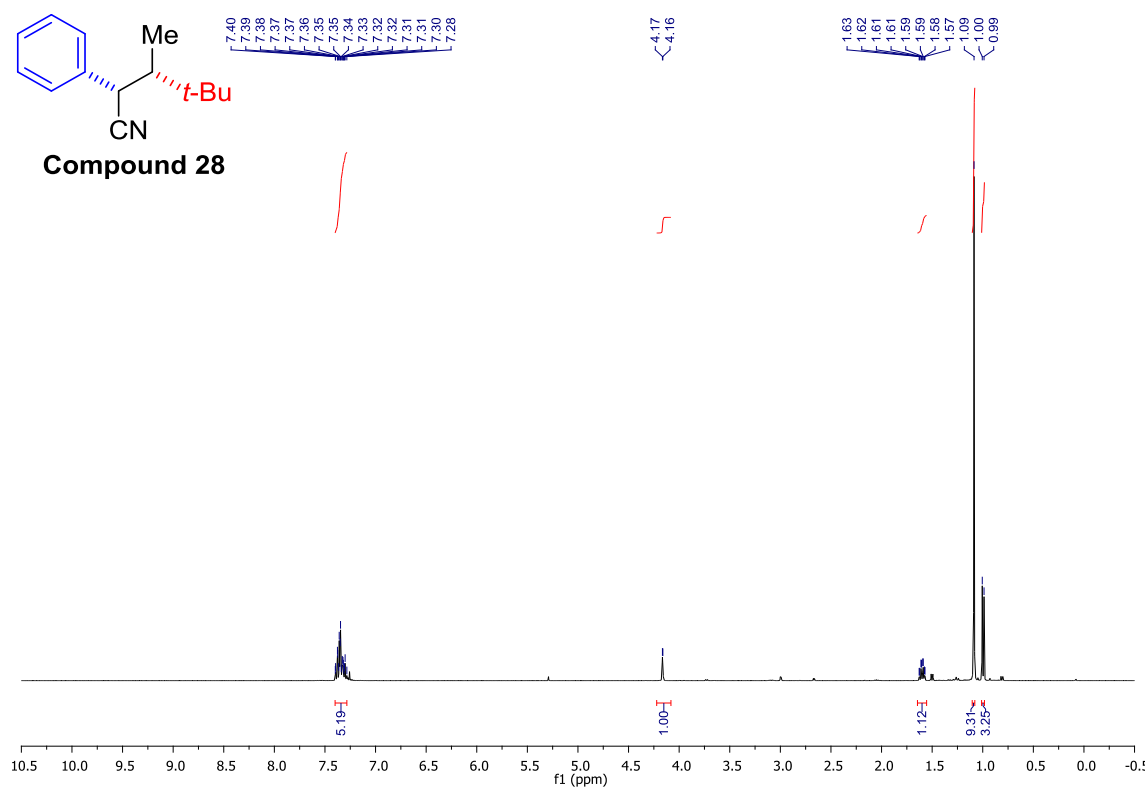

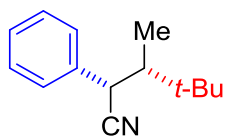

**Compound 28**

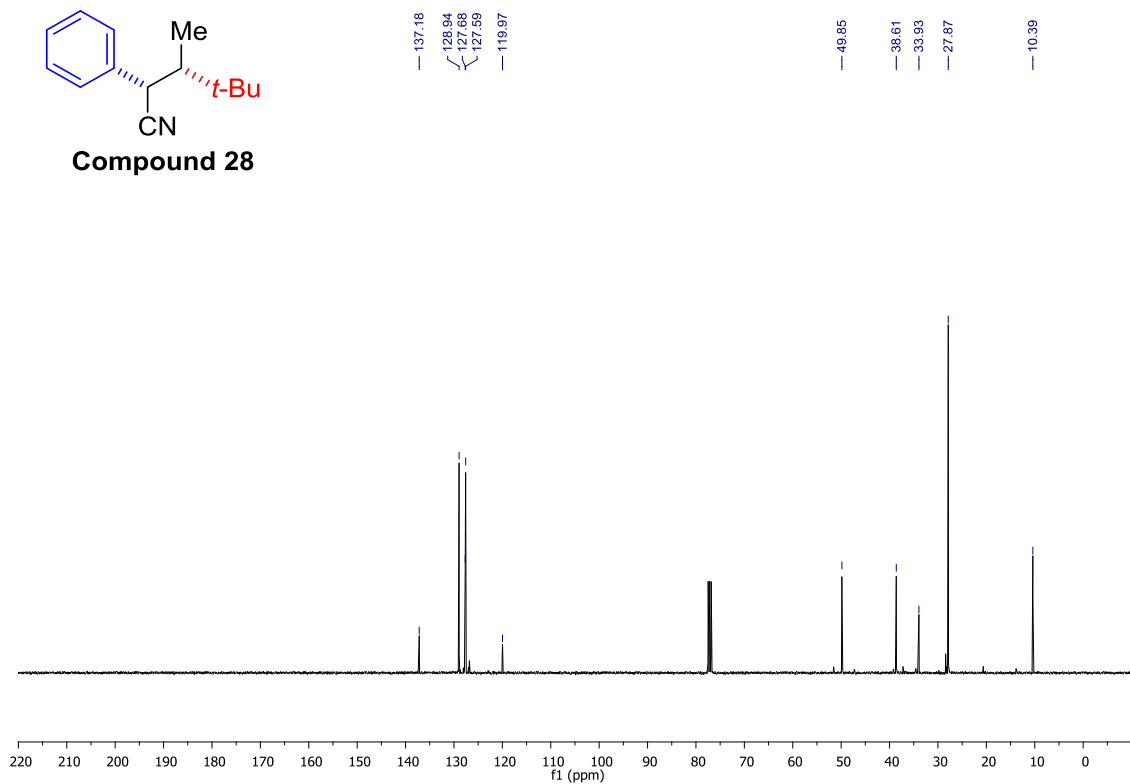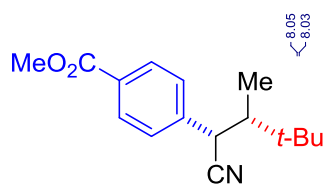

**Compound 29**

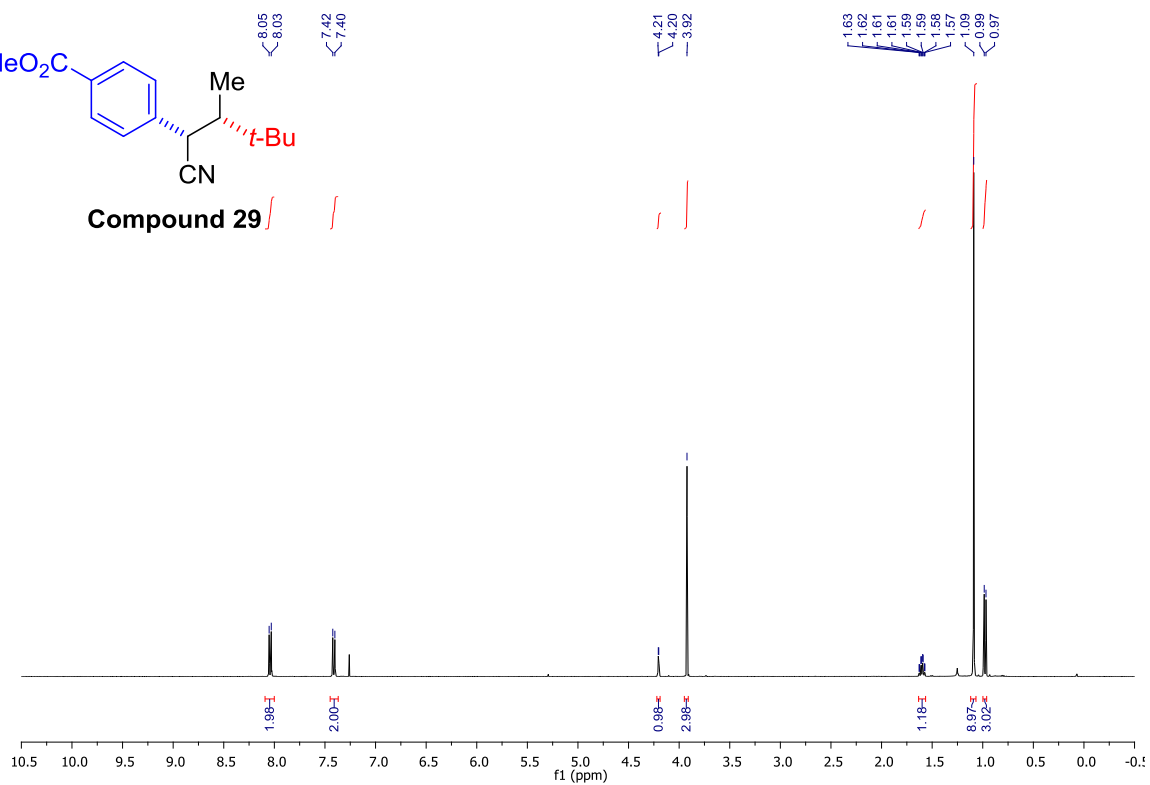

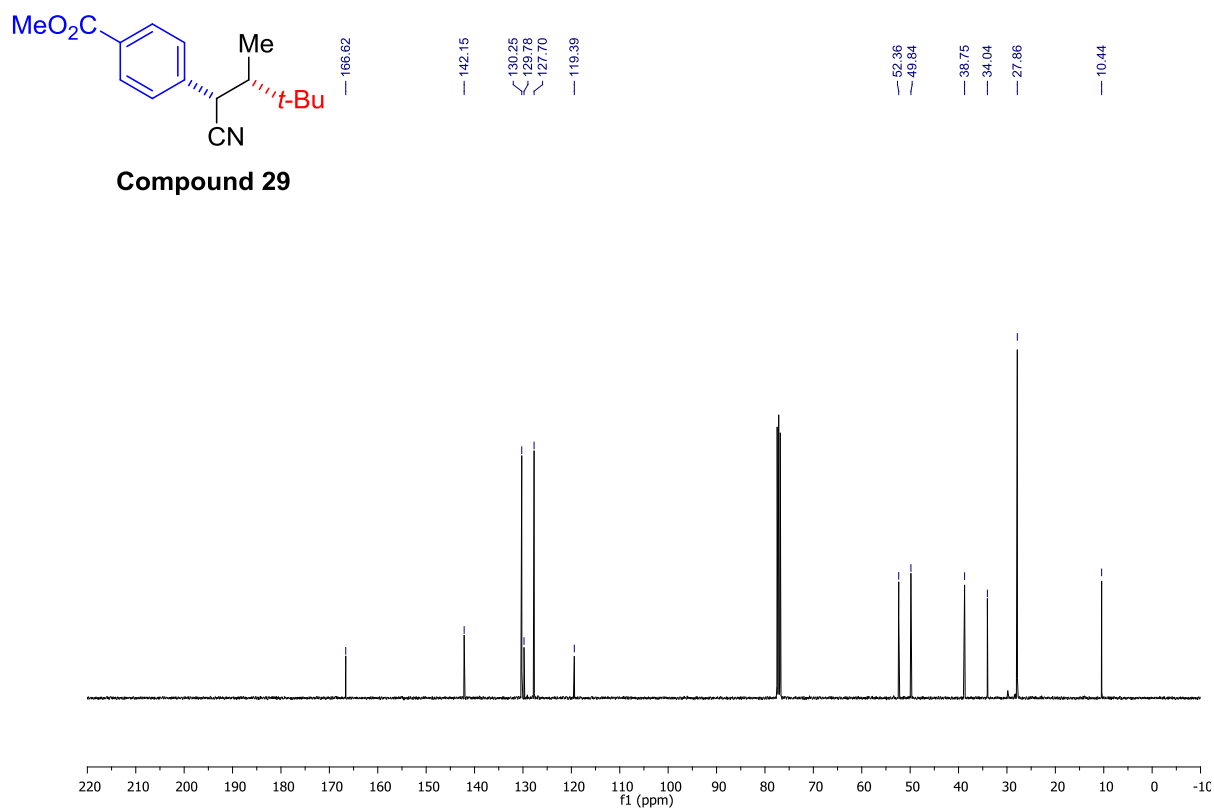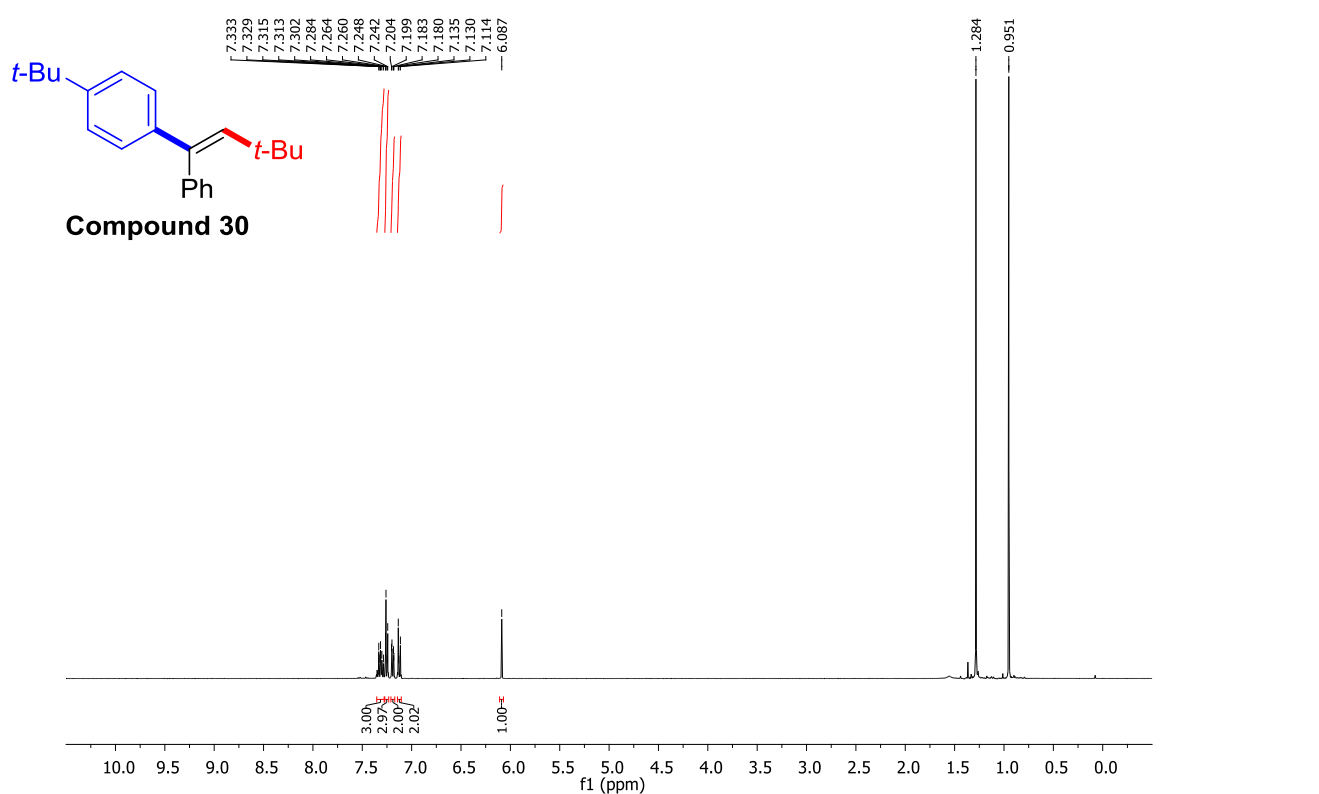

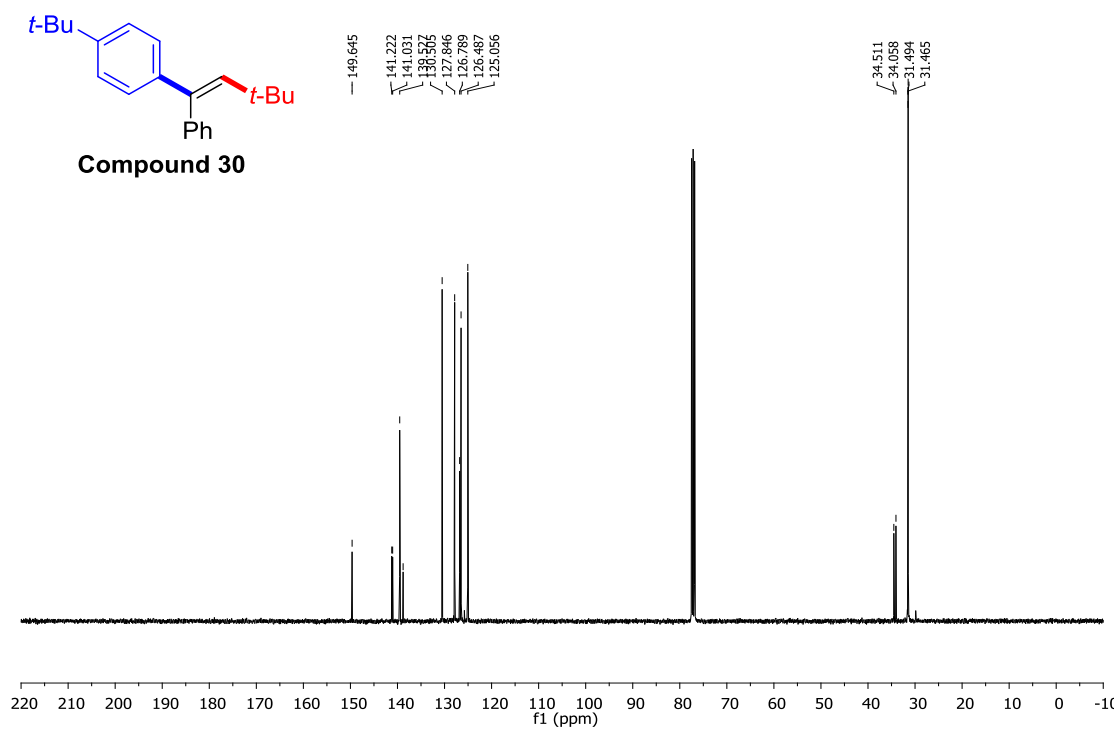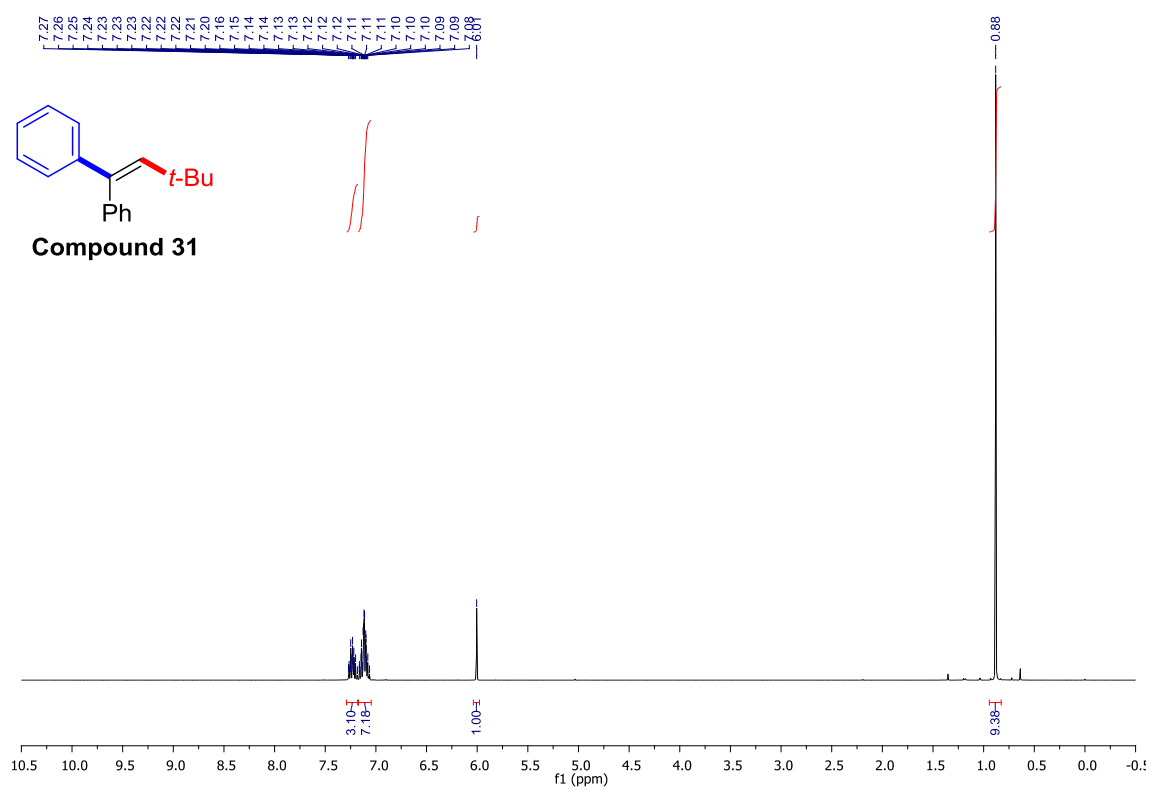

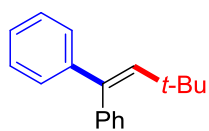

**Compound 31**

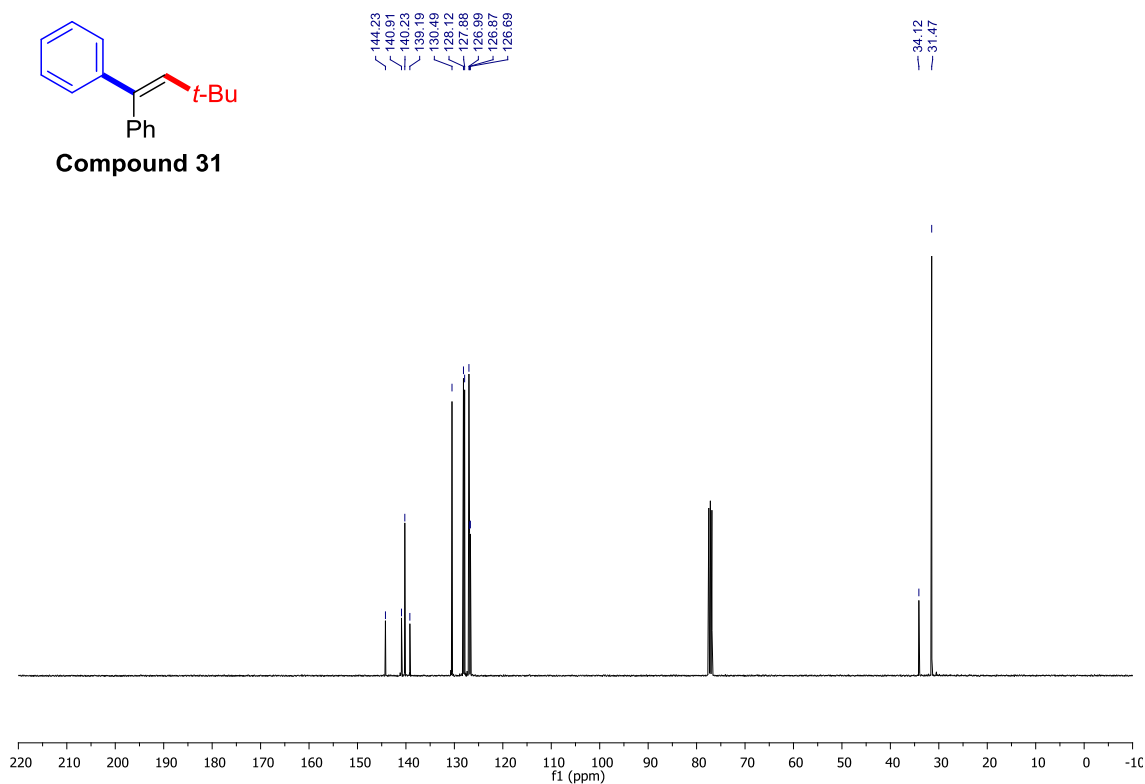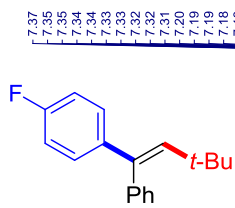

**Compound 32**

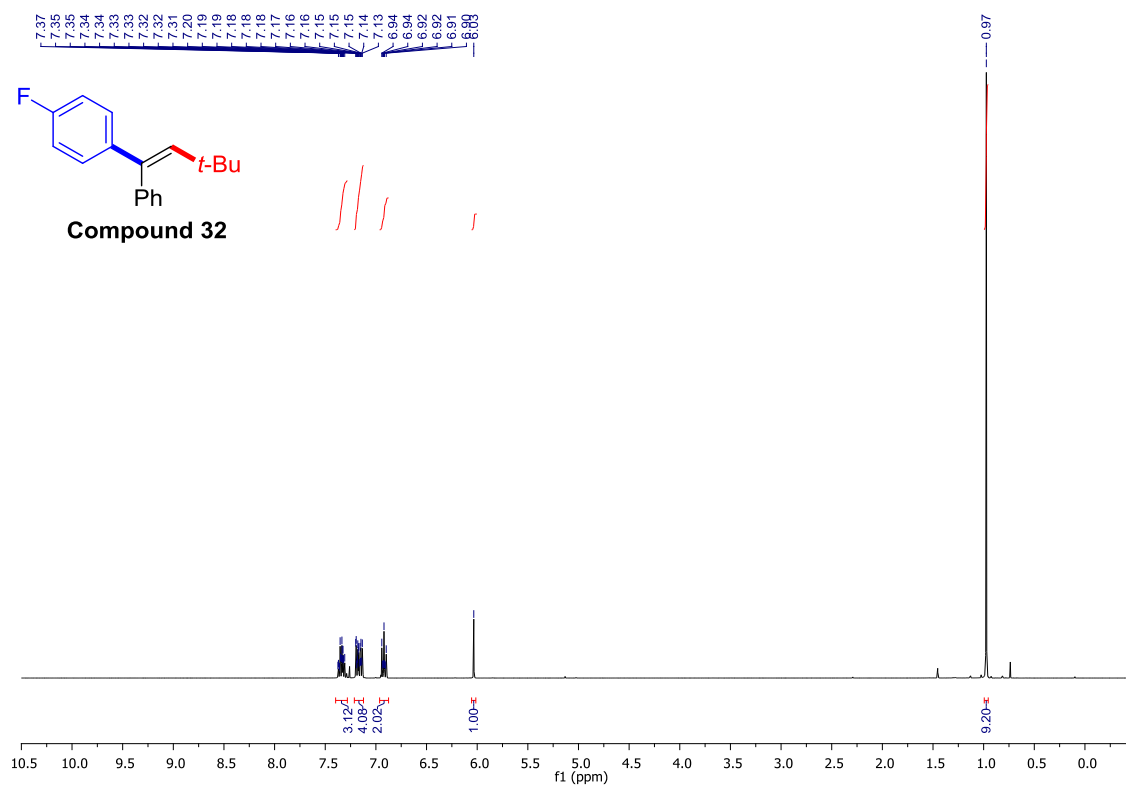

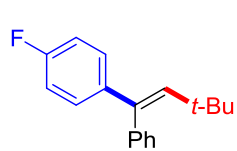

Compound 32

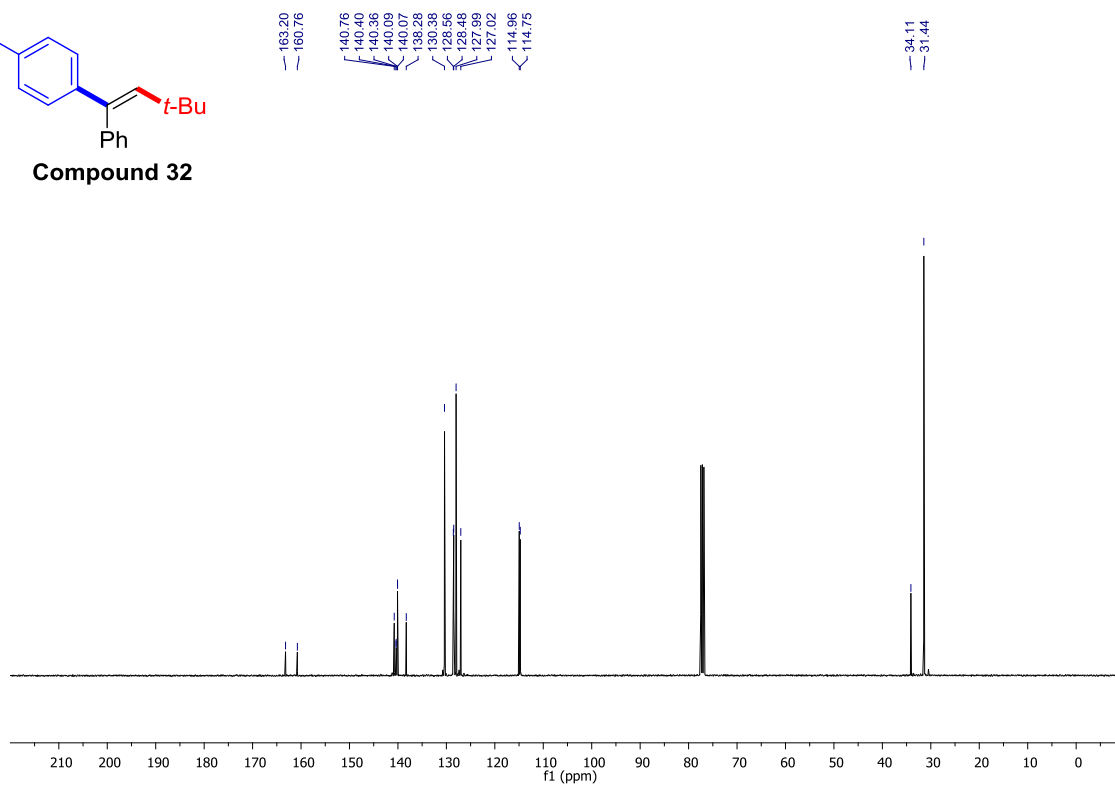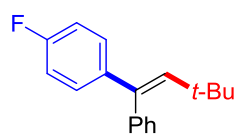

Compound 32

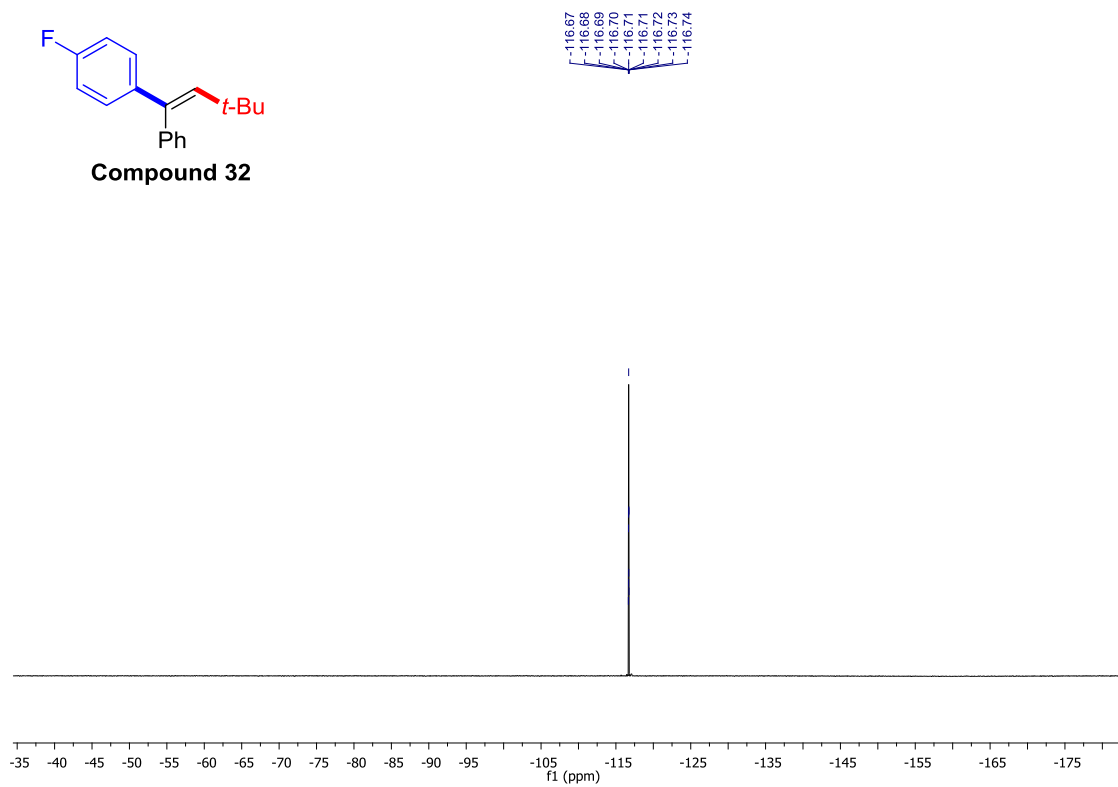

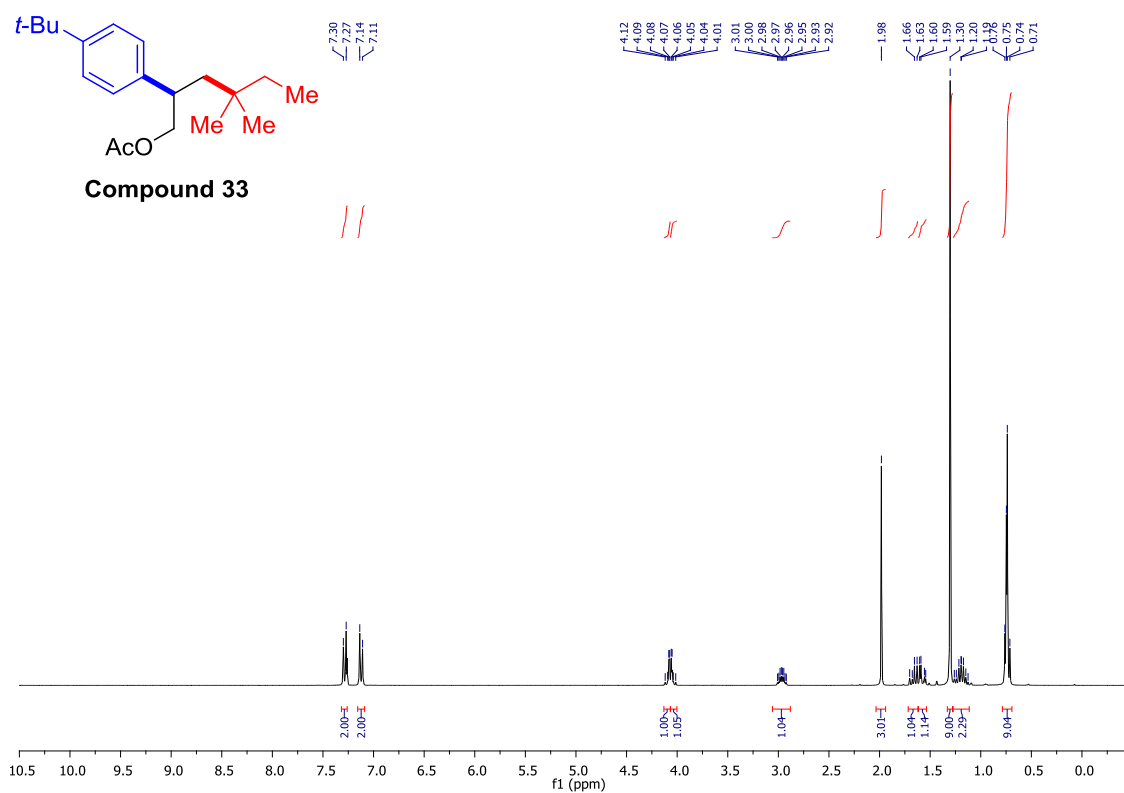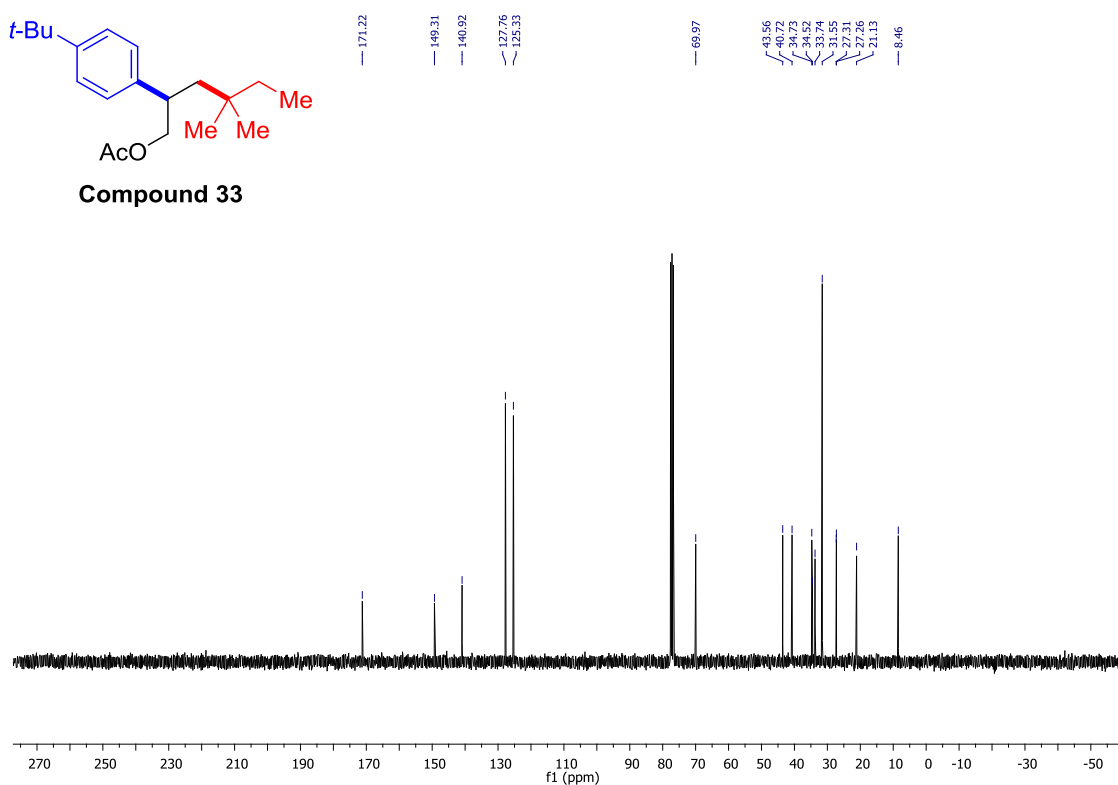



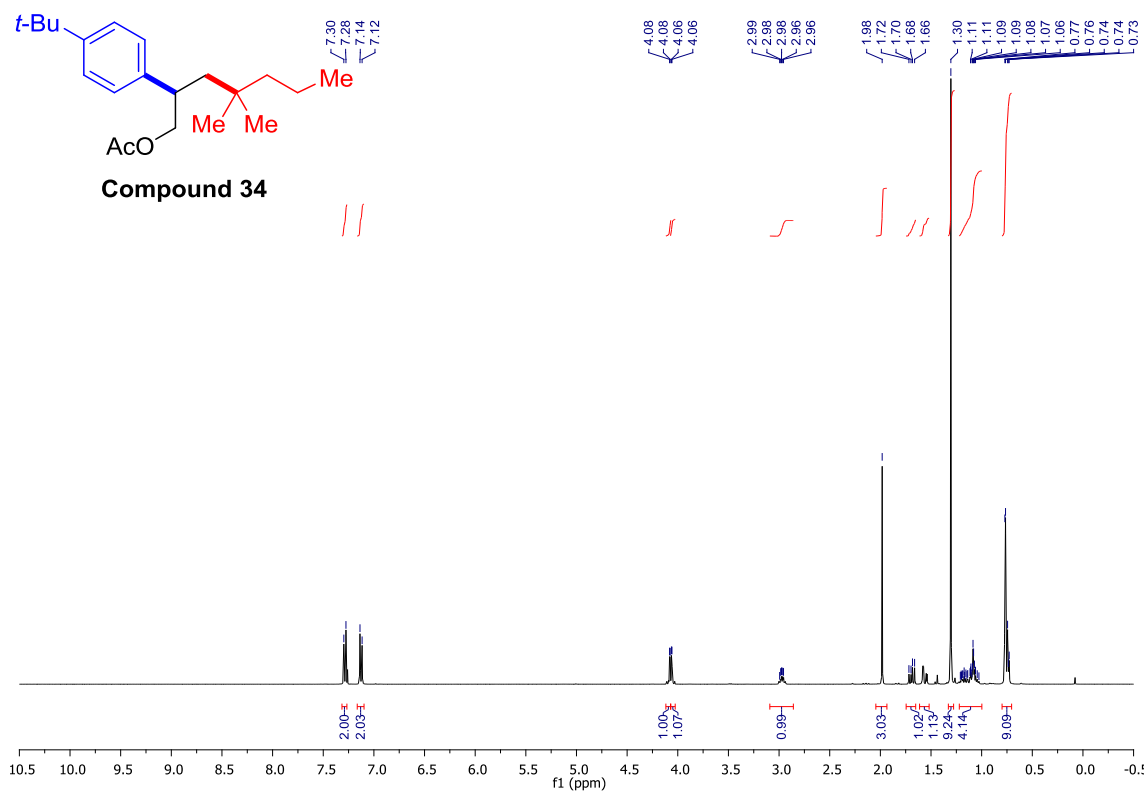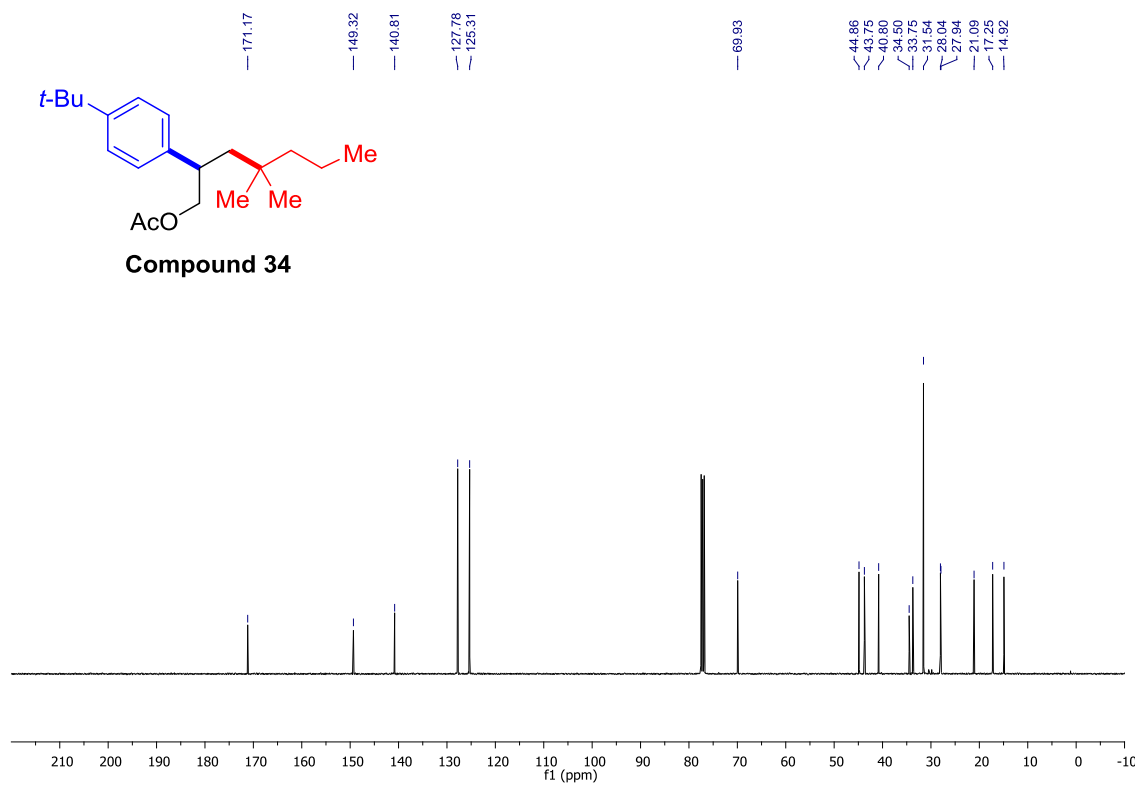

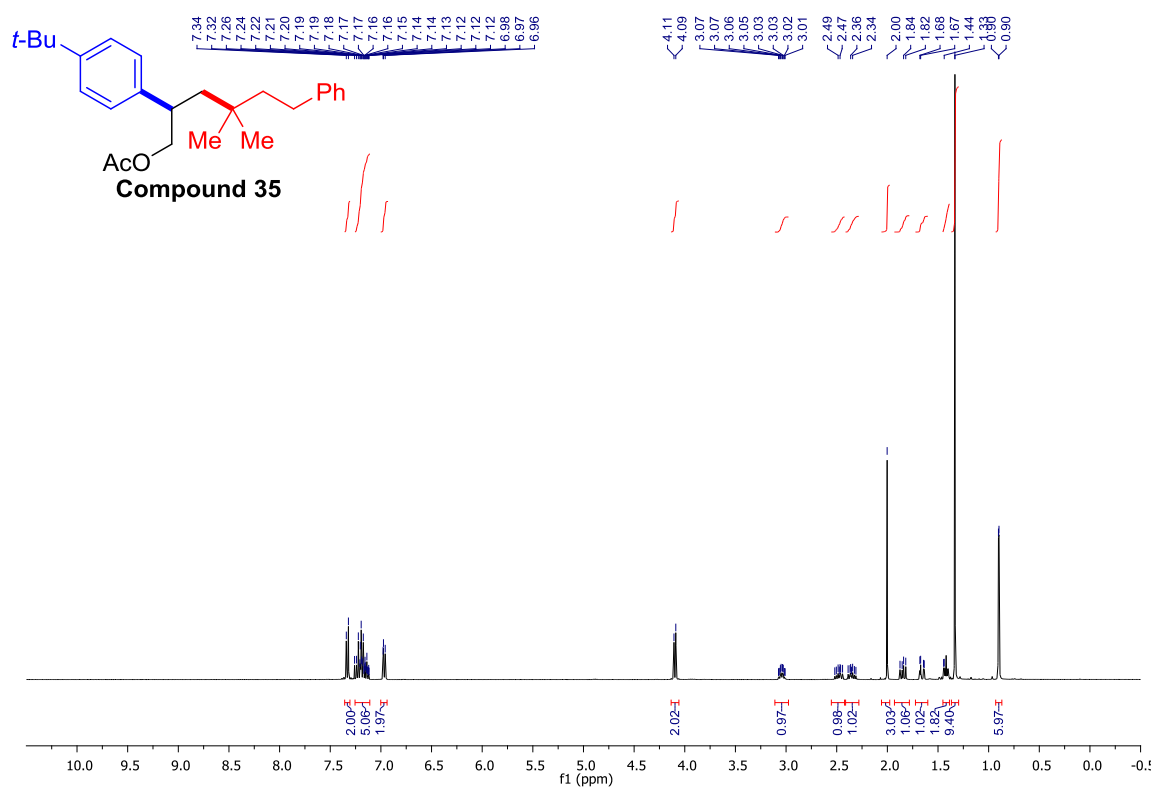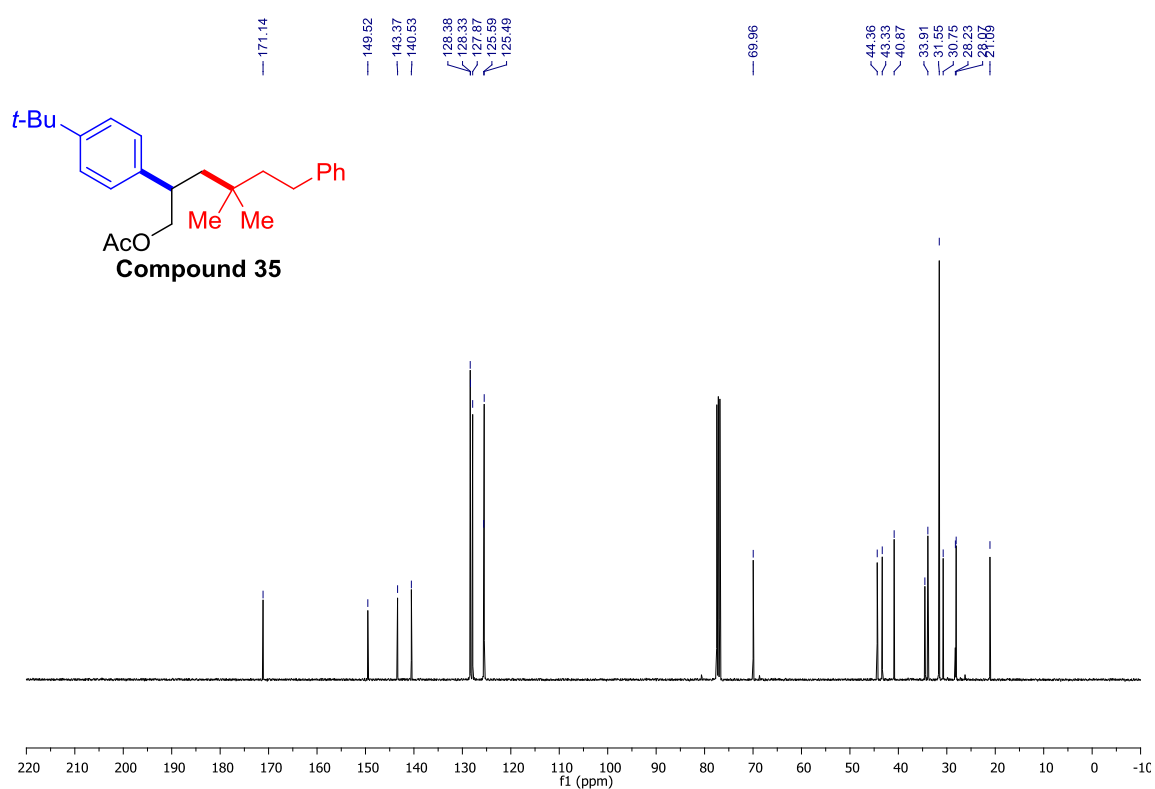

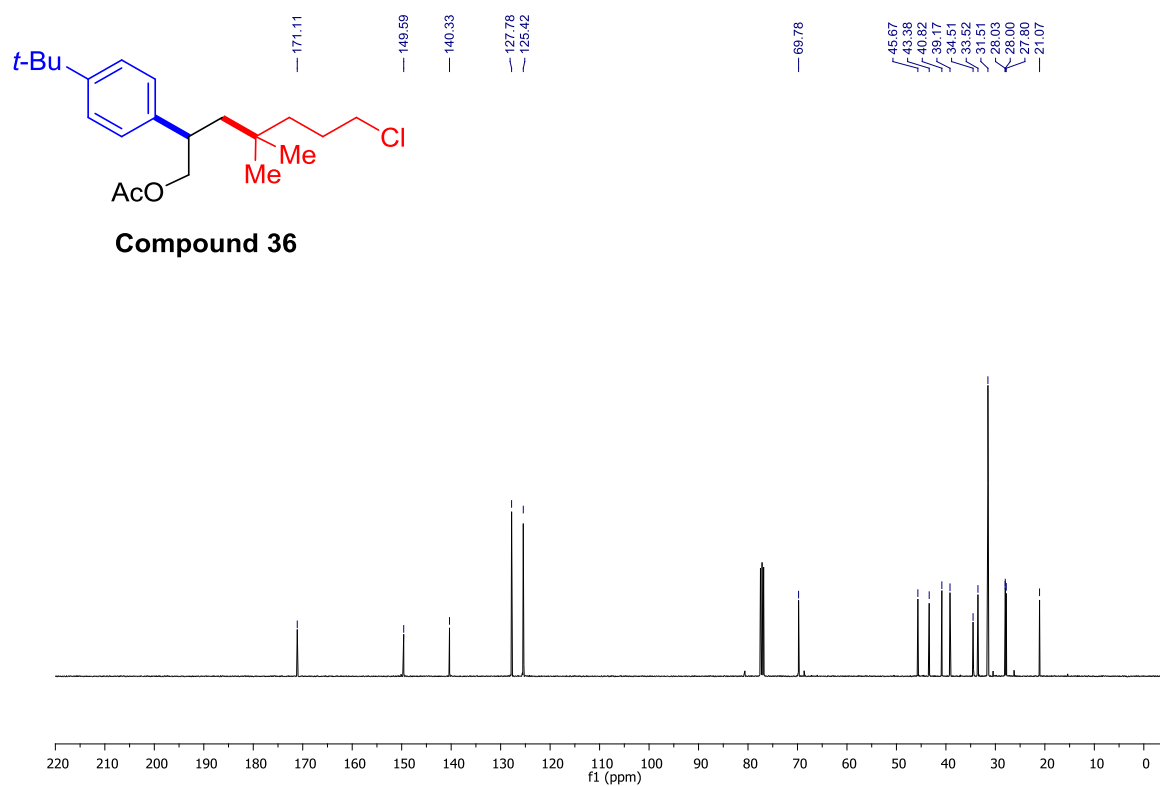

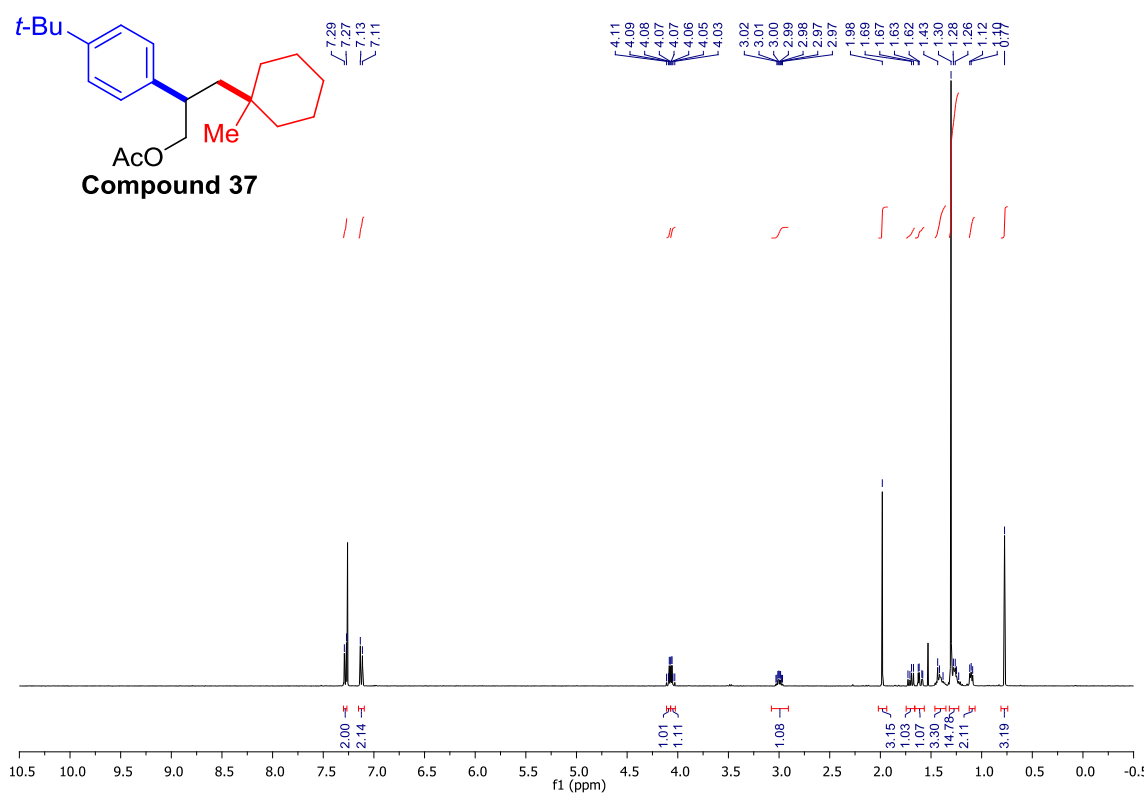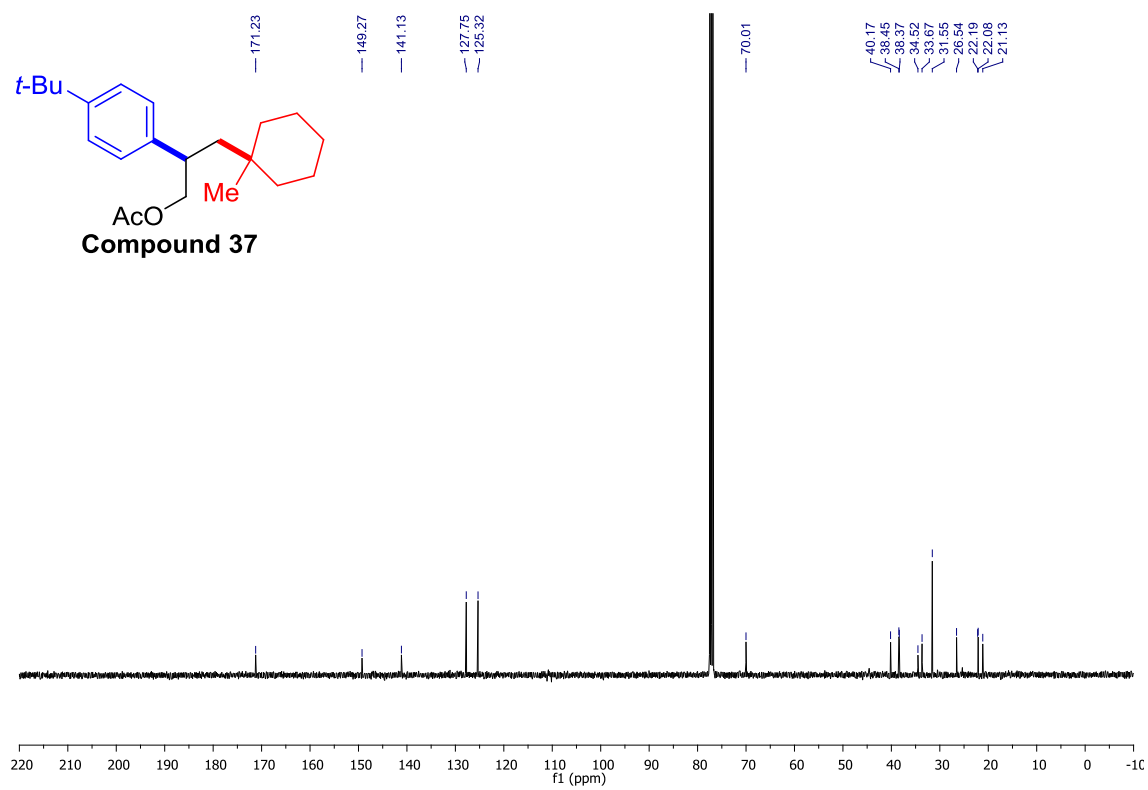

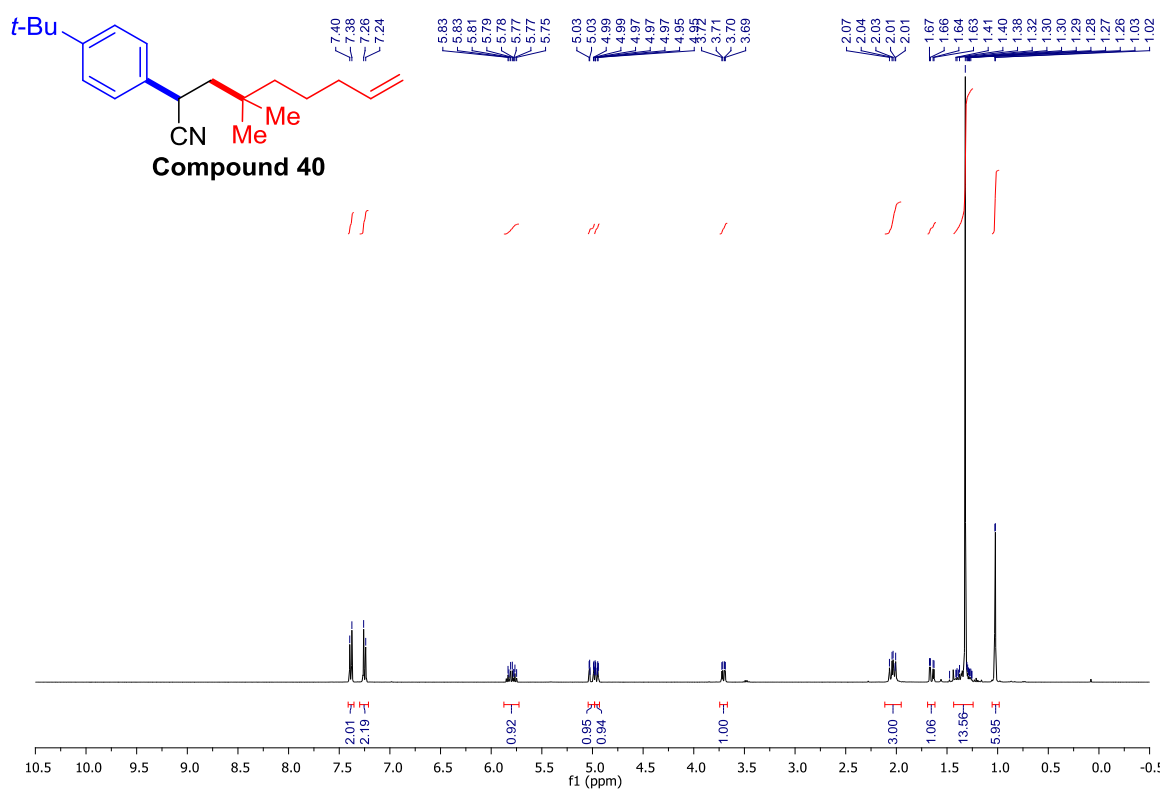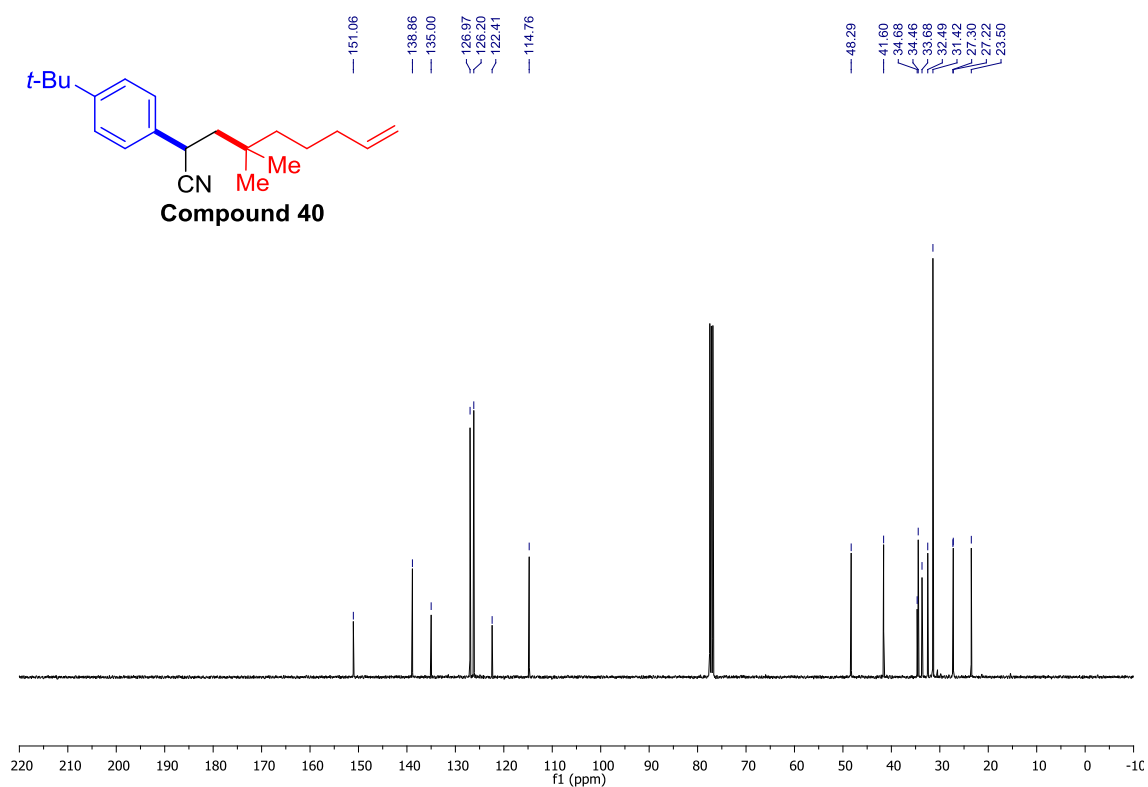

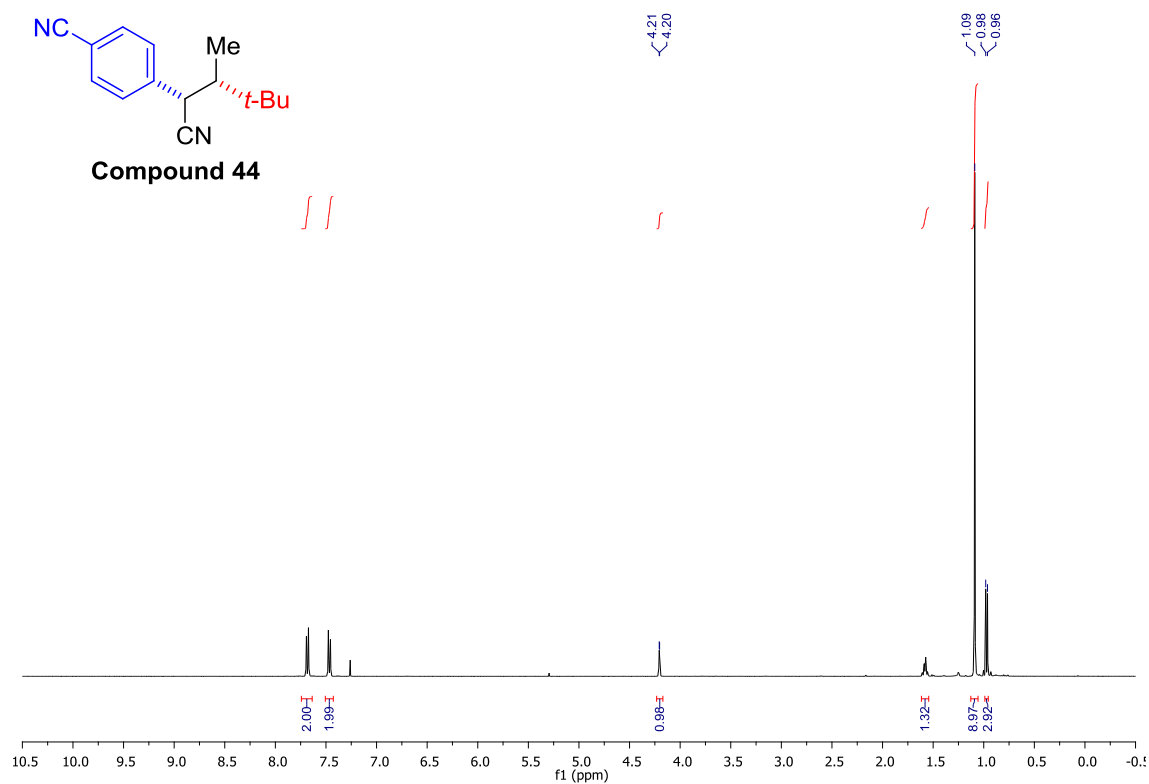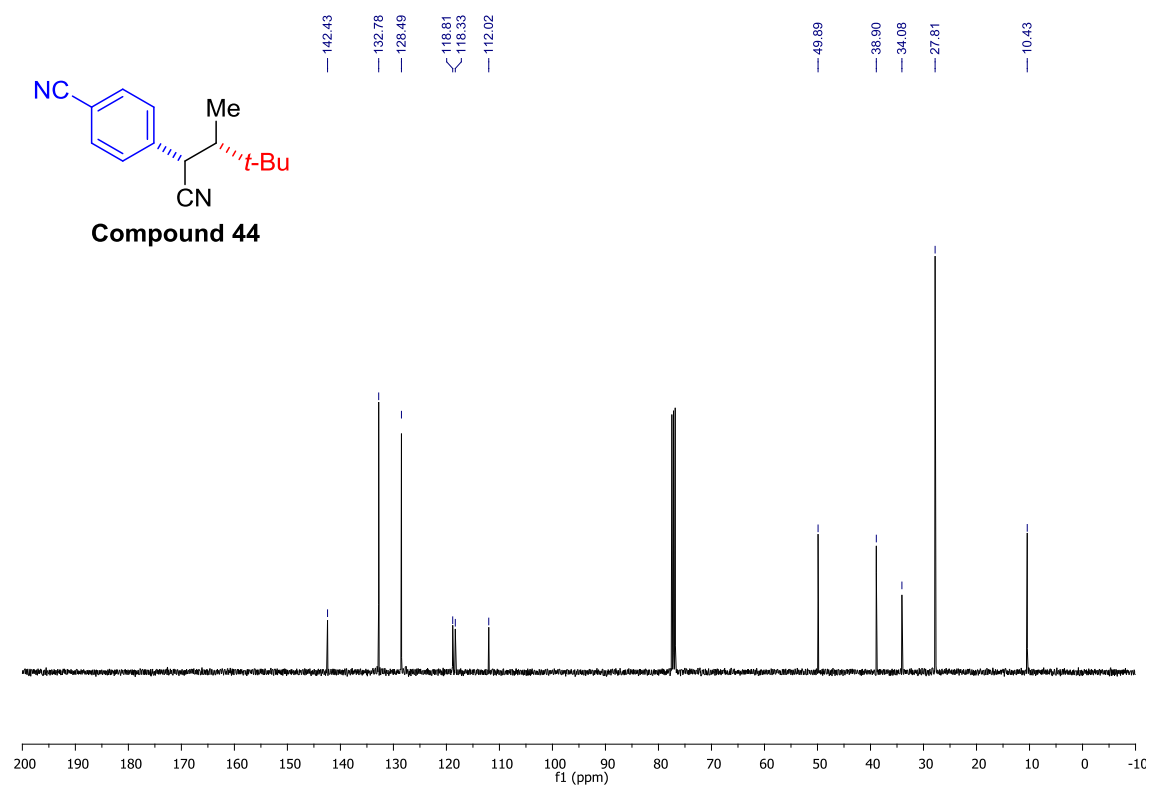

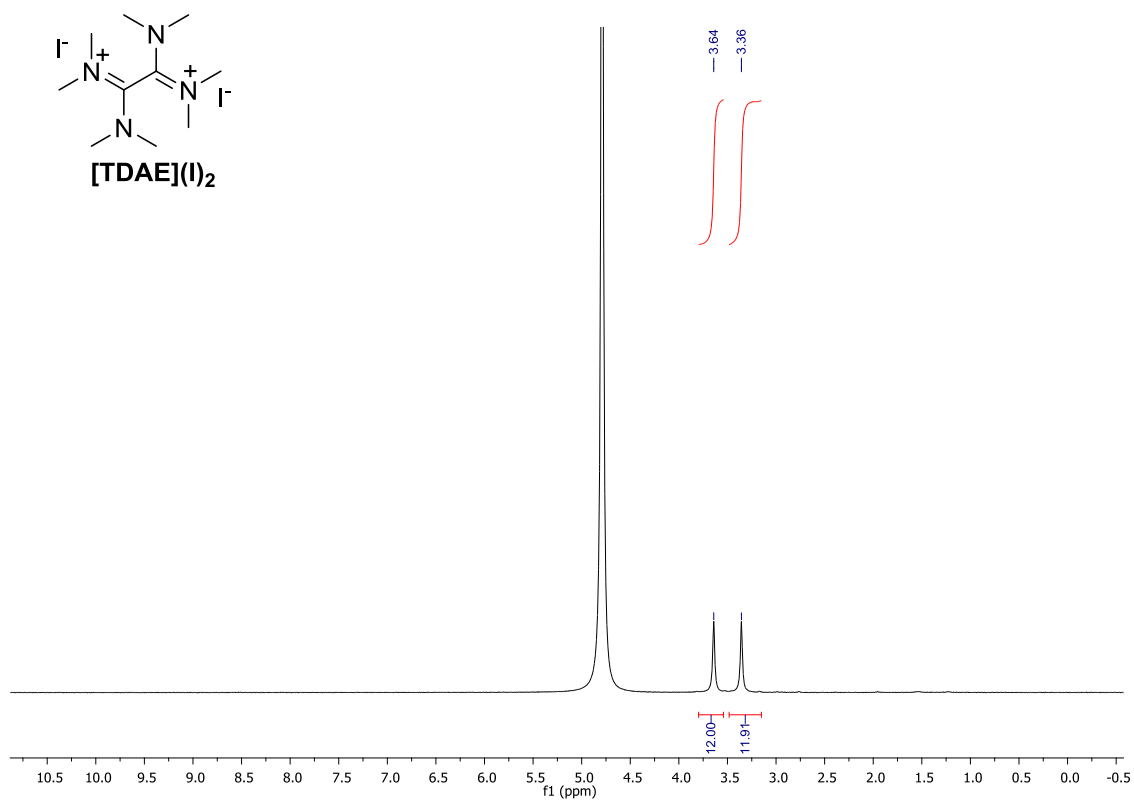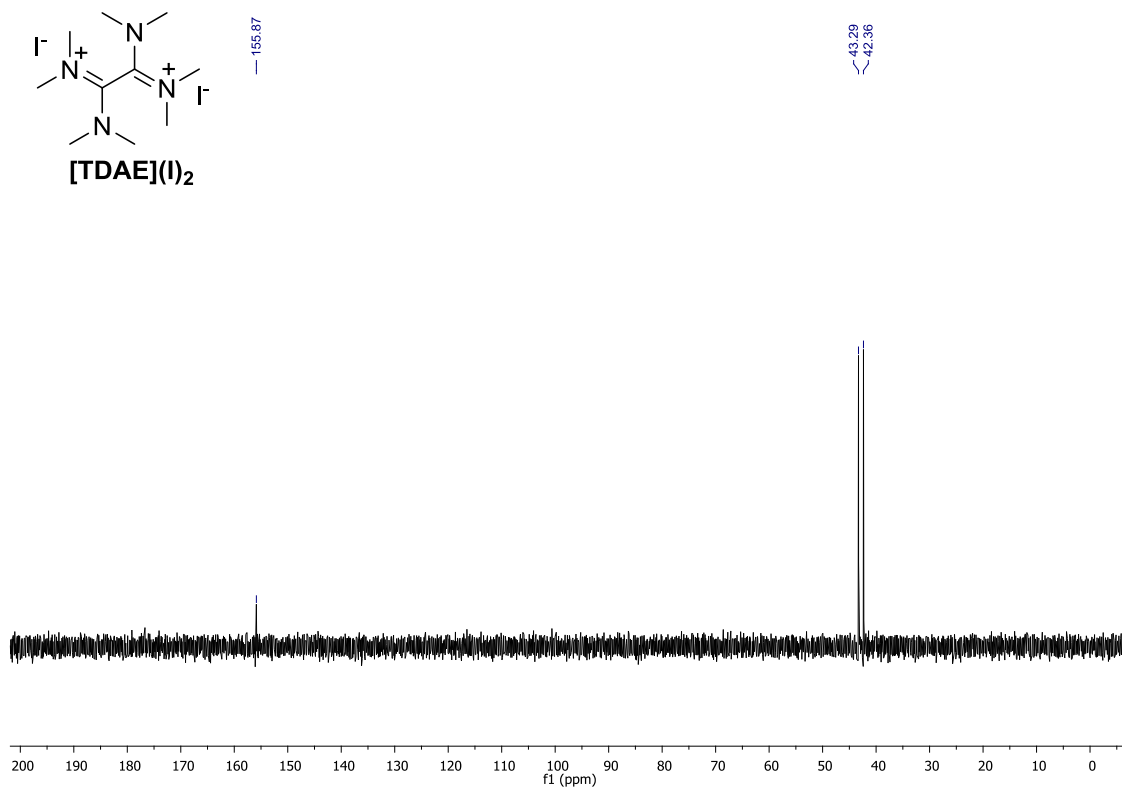

## 10. X-Ray Diffraction Data

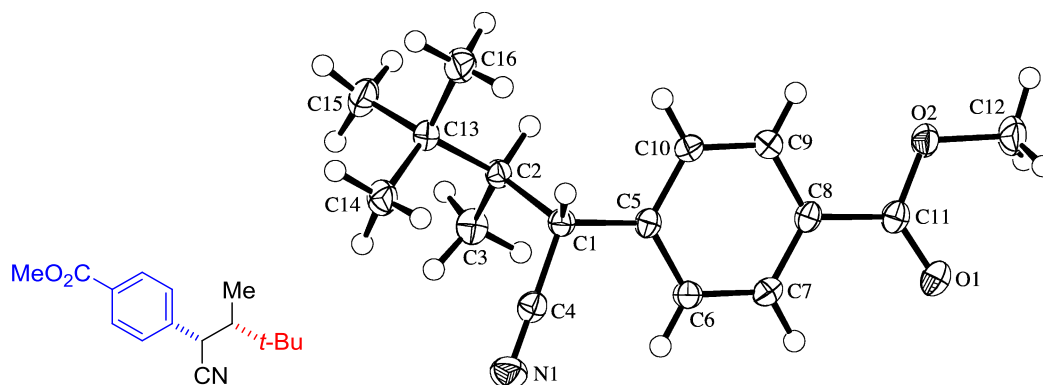

**Figure S1.** ORTEP representation of the molecule **29** (50% probability ellipsoids; H-atoms given arbitrary displacement parameters for clarity).

**Table S1.** Crystallographic Data

|                                             |                                                 |
|---------------------------------------------|-------------------------------------------------|
| Crystallised from                           | CH <sub>2</sub> Cl <sub>2</sub> / hexane        |
| Empirical formula                           | C <sub>16</sub> H <sub>21</sub> NO <sub>2</sub> |
| Formula weight [g mol <sup>-1</sup> ]       | 259.34                                          |
| Crystal colour, habit                       | colourless, prism                               |
| Crystal dimensions [mm]                     | 0.12 × 0.20 × 0.27                              |
| Temperature [K]                             | 160(1)                                          |
| Crystal system                              | monoclinic                                      |
| Space group                                 | <i>P</i> 2 <sub>1</sub> / <i>n</i> (#14)        |
| <i>Z</i>                                    | 4                                               |
| Reflections for cell determination          | 9907                                            |
| 2 $\theta$ range for cell determination [°] | 7–149                                           |
| Unit cell parameters                        |                                                 |
| <i>a</i> [Å]                                | 6.29308(6)                                      |
| <i>b</i> [Å]                                | 12.62973(10)                                    |
| <i>c</i> [Å]                                | 18.01319(14)                                    |
| $\alpha$ [°]                                | 90                                              |
| $\beta$ [°]                                 | 93.0741(8)                                      |
| $\gamma$ [°]                                | 90                                              |
| <i>V</i> [Å <sup>3</sup> ]                  | 1429.63(2)                                      |
| <i>F</i> (000)                              | 560                                             |
| <i>D</i> <sub>x</sub> [g cm <sup>-3</sup> ] | 1.205                                           |



|                                               |                                                                                     |
|-----------------------------------------------|-------------------------------------------------------------------------------------|
| $\mu(\text{Cu } K\alpha)$ [mm <sup>-1</sup> ] | 0.625                                                                               |
| Scan type                                     | $\omega$                                                                            |
| $2\theta_{(\text{max})}$ [°]                  | 148.4                                                                               |
| Transmission factors (min; max)               | 0.814; 1.000                                                                        |
| Total reflections measured                    | 13859                                                                               |
| Symmetry independent reflections              | 2867                                                                                |
| $R_{\text{int}}$                              | 0.012                                                                               |
| Reflections with $I > 2\sigma(I)$             | 2763                                                                                |
| Reflections used in refinement                | 2867                                                                                |
| Parameters refined                            | 178                                                                                 |
| Final $R(F)$ [ $I > 2\sigma(I)$ reflections]  | 0.0339                                                                              |
| $wR(F^2)$ (all data)                          | 0.0884                                                                              |
| Weights:                                      | $w = [\sigma^2(F_o^2) + (0.0433P)^2 + 0.3995P]^{-1}$ where $P = (F_o^2 + 2F_c^2)/3$ |
| Goodness of fit                               | 1.055                                                                               |
| Secondary extinction coefficient              | 0.0035(6)                                                                           |
| Final $\Delta_{\text{max}}/\sigma$            | 0.001                                                                               |
| $\Delta\rho$ (max; min) [e Å <sup>-3</sup> ]  | 0.31; -0.14                                                                         |
| $\sigma(d_{\text{C-C}})$ [Å]                  | 0.0012 – 0.0014                                                                     |

**Table S2.** Bond lengths (Å) with standard uncertainties in parentheses.

|       |         |             |        |         |             |
|-------|---------|-------------|--------|---------|-------------|
| O (1) | –C (11) | 1.2058 (12) | C (5)  | –C (10) | 1.3953 (13) |
| O (2) | –C (11) | 1.3414 (12) | C (6)  | –C (7)  | 1.3891 (14) |
| O (2) | –C (12) | 1.4428 (12) | C (7)  | –C (8)  | 1.3877 (14) |
| N (1) | –C (4)  | 1.1434 (14) | C (8)  | –C (9)  | 1.3961 (14) |
| C (1) | –C (4)  | 1.4733 (13) | C (8)  | –C (11) | 1.4900 (13) |
| C (1) | –C (5)  | 1.5269 (12) | C (9)  | –C (10) | 1.3832 (14) |
| C (1) | –C (2)  | 1.5640 (12) | C (13) | –C (14) | 1.5294 (13) |
| C (2) | –C (3)  | 1.5291 (13) | C (13) | –C (16) | 1.5322 (14) |
| C (2) | –C (13) | 1.5561 (13) | C (13) | –C (15) | 1.5340 (14) |
| C (5) | –C (6)  | 1.3893 (13) |        |         |             |

**Table S3.** Bond angles (°) with standard uncertainties in parentheses.

|                       |             |                        |
|-----------------------|-------------|------------------------|
| C (11) -O (2) -C (12) | 115.17 (8)  | C (7) -C (8) -C (11)   |
| 118.44 (8)            |             |                        |
| C (4) -C (1) -C (5)   | 110.89 (8)  | C (9) -C (8) -C (11)   |
| 121.94 (9)            |             |                        |
| C (4) -C (1) -C (2)   | 110.48 (7)  | C (10) -C (9) -C (8)   |
| 119.87 (9)            |             |                        |
| C (5) -C (1) -C (2)   | 112.25 (7)  | C (9) -C (10) -C (5)   |
| 120.96 (9)            |             |                        |
| C (3) -C (2) -C (13)  | 114.99 (8)  | O (1) -C (11) -O (2)   |
| 123.53 (9)            |             |                        |
| C (3) -C (2) -C (1)   | 109.94 (8)  | O (1) -C (11) -C (8)   |
| 124.12 (9)            |             |                        |
| C (13) -C (2) -C (1)  | 113.45 (7)  | O (2) -C (11) -C (8)   |
| 112.35 (8)            |             |                        |
| N (1) -C (4) -C (1)   | 178.39 (10) | C (14) -C (13) -C (16) |
| 108.96 (9)            |             |                        |
| C (6) -C (5) -C (10)  | 118.75 (9)  | C (14) -C (13) -C (15) |
| 108.78 (8)            |             |                        |
| C (6) -C (5) -C (1)   | 123.44 (8)  | C (16) -C (13) -C (15) |
| 107.33 (9)            |             |                        |
| C (10) -C (5) -C (1)  | 117.79 (8)  | C (14) -C (13) -C (2)  |
| 113.34 (8)            |             |                        |
| C (7) -C (6) -C (5)   | 120.65 (9)  | C (16) -C (13) -C (2)  |
| 108.97 (8)            |             |                        |
| C (8) -C (7) -C (6)   | 120.25 (9)  | C (15) -C (13) -C (2)  |
| 109.28 (8)            |             |                        |
| C (7) -C (8) -C (9)   | 119.52 (9)  |                        |

**Table S4.** Torsion angles (°) with standard uncertainties in parentheses.

|                             |             |                              |
|-----------------------------|-------------|------------------------------|
| C (4) -C (1) -C (2) -C (3)  | -47.0 (1)   | C (8) -C (9) -C (10) -C (5)  |
| -0.3 (2)                    |             |                              |
| C (5) -C (1) -C (2) -C (3)  | 77.36 (9)   | C (6) -C (5) -C (10) -C (9)  |
| -0.2 (1)                    |             |                              |
| C (4) -C (1) -C (2) -C (13) | 83.4 (1)    | C (1) -C (5) -C (10) -C (9)  |
| 178.27 (9)                  |             |                              |
| C (5) -C (1) -C (2) -C (13) | -152.31 (8) | C (12) -O (2) -C (11) -O (1) |
| -7.2 (1)                    |             |                              |
| C (4) -C (1) -C (5) -C (6)  | 6.9 (1)     | C (12) -O (2) -C (11) -C (8) |
| 171.85 (9)                  |             |                              |

|                                          |                              |
|------------------------------------------|------------------------------|
| C (2) -C (1) -C (5) -C (6) -117.18 (9)   | C (7) -C (8) -C (11) -O (1)  |
| -6.4 (2)                                 |                              |
| C (4) -C (1) -C (5) -C (10) -171.49 (8)  | C (9) -C (8) -C (11) -O (1)  |
| 169.9 (1)                                |                              |
| C (2) -C (1) -C (5) -C (10) 64.4 (1)     | C (7) -C (8) -C (11) -O (2)  |
| 174.59 (8)                               |                              |
| C (10) -C (5) -C (6) -C (7) 0.5 (1)      | C (9) -C (8) -C (11) -O (2)  |
| -9.1 (1)                                 |                              |
| C (1) -C (5) -C (6) -C (7) -177.88 (8)   | C (3) -C (2) -C (13) -C (14) |
| 75.3 (1)                                 |                              |
| C (5) -C (6) -C (7) -C (8) -0.3 (1)      | C (1) -C (2) -C (13) -C (14) |
| -52.5 (1)                                |                              |
| C (6) -C (7) -C (8) -C (9) -0.2 (1)      | C (3) -C (2) -C (13) -C (16) |
| -163.21 (9)                              |                              |
| C (6) -C (7) -C (8) -C (11) 176.18 (8)   | C (1) -C (2) -C (13) -C (16) |
| 69.0 (1)                                 |                              |
| C (7) -C (8) -C (9) -C (10) 0.5 (1)      | C (3) -C (2) -C (13) -C (15) |
| -46.2 (1)                                |                              |
| C (11) -C (8) -C (9) -C (10) -175.75 (9) | C (1) -C (2) -C (13) -C (15) |
| -173.96 (8)                              |                              |

## 11. References

- 
- <sup>1</sup> R. L. Jezorek, N. Zhang, P. Leowanawat, M. H. Bunner, N. Gutsche, A. K. R. Pesti, J. T. Olsen, V. Percec *Org. Lett.* **2014**, 16, 6326.
- <sup>2</sup> A. García Martínez, R. Martínez Alvarez, E. Teso Vilar, A. García Fraile, J. Osío Barcina, M. Hanack, L. R. Subramanian *Tetrahedron Lett.* **1987**, 28, 6441.
- <sup>3</sup> E. C. Ashby, C. O. Welder *J. Org. Chem.* **1998**, 63, 7707.
- <sup>4</sup> F. F. Fleming, B. C. Shook, T. Jiang, O. W. Steward *Tetrahedron* **2003**, 59, 737.
- <sup>5</sup> M. Lauwers, B. Regnier, M. Van Eenoo, J. N. Denis, A. Krief *Tetrahedron Lett.* **1979**, 20, 1801.
- <sup>6</sup> A. S. Dudnik, G. C. Fu *J. Am. Chem. Soc.* **2012**, 134, 10693.
- <sup>7</sup> V. Církva, B. Améduri, B. Boutevin, J. Kvíčala, O. Paleta *J. Fluor. Chem.* **1995**, 74, 97.
- <sup>8</sup> S. Biswas, D. J. Weix *J. Am. Chem. Soc.* **2013**, 135, 16192.
- <sup>9</sup> NMR crude analysis showed 20% of recovered starting olefin (**S2**) and 10% yield of olefin hydroarylation product.
- <sup>10</sup> Z. Li, A. García-Domínguez, C. Nevado *Angew. Chem. Int. Ed.* **2016**, 55, 6938.
- <sup>11</sup> J. A. Varela, D. Peña, B. Goldfuss, K. Polborn, P. Knochel *Org. Lett.*, **2001**, 3, 2395.
- <sup>12</sup> a) M. Newcomb, M. A. Filipkowski, C. C. Johnson *Tetrahedron Lett.* **1995**, 36, 3643.  
b) H. Fischer, L. Radom *Angew. Chem. Int. Ed.* **2001**, 40, 1340.
- <sup>13</sup> K. M. M. Huihui, J. A. Caputo, Z. Melchor, A. M. Olivares, A. M. Spiewak, K. A. Johnson, T. A. DiBenedetto, S. Kim, L. K. G. Ackerman, D. J. Weix, *J. Am. Chem. Soc.* **2016**, 138, 5016.
- <sup>14</sup> Y.-H. Joo, H. Gao, Y. Zhang, J. M. Shreeve *Inorg. Chem.* **2010**, 49, 3282.
